# Supplementary material for: Re2O7-catalyzed three-component synthesis of protected secondary and tertiary homoallylic amines
Source: Royal Society of Chemistry journal article supplement (doi:10.1039/c2cc15472b), 2012-01-01

## Supporting Information - II: Spectra

### Re<sub>2</sub>O<sub>7</sub>-Catalyzed Three-Component Synthesis of Protected Secondary and Tertiary Homoallylic Amines

Suman Pramanik and Prasanta Ghorai\*

Department of Chemistry, Indian Institute of Science Education and Research Bhopal, Bhopal-462023, India.

E-mail: [pghorai@iiserbhopal.ac.in](mailto:pghorai@iiserbhopal.ac.in)

#### Contents:

|                                                                                             | Page: |
|---------------------------------------------------------------------------------------------|-------|
| Benzyl-(1-phenylbut-3-en-1-yl)carbamate ( <b>3a</b> ), <sup>1</sup> H                       | 4     |
| Benzyl-(1-phenylbut-3-en-1-yl)carbamate ( <b>3a</b> ), <sup>13</sup> C                      | 5     |
| Benzyl-(1-(p-tolyl)but-3-en-1-yl)carbamate ( <b>3b</b> ), <sup>1</sup> H                    | 6     |
| Benzyl-(1-(p-tolyl)but-3-en-1-yl)carbamate ( <b>3b</b> ), <sup>13</sup> C                   | 7     |
| Benzyl-(1-(4-methoxyphenyl)but-3-en-1-yl)carbamate ( <b>3c</b> ), <sup>1</sup> H            | 8     |
| Benzyl-(1-(4-methoxyphenyl)but-3-en-1-yl)carbamate ( <b>3c</b> ), <sup>13</sup> C           | 9     |
| Benzyl-(1-(4-chlorophenyl)but-3-en-1-yl)carbamate ( <b>3d</b> ), <sup>1</sup> H             | 10    |
| Benzyl-(1-(4-chlorophenyl)but-3-en-1-yl)carbamate ( <b>3d</b> ), <sup>13</sup> C            | 11    |
| Benzyl-(1-(4-nitrophenyl)but-3-en-1-yl)carbamate ( <b>3e</b> ), <sup>1</sup> H              | 12    |
| Benzyl-(1-(4-nitrophenyl)but-3-en-1-yl)carbamate ( <b>3e</b> ), <sup>13</sup> C             | 13    |
| Benzyl-(1-(4-cyanophenyl)but-3-en-1-yl)carbamate ( <b>3f</b> ), <sup>1</sup> H              | 14    |
| Benzyl-(1-(4-cyanophenyl)but-3-en-1-yl)carbamate ( <b>3f</b> ), <sup>13</sup> C             | 15    |
| Benzyl-(1-(4-(trifluoromethyl)phenyl)but-3-en-1-yl)carbamate ( <b>3g</b> ), <sup>1</sup> H  | 16    |
| Benzyl-(1-(4-(trifluoromethyl)phenyl)but-3-en-1-yl)carbamate ( <b>3g</b> ), <sup>13</sup> C | 17    |
| Benzyl-(1-(thiophen-3-yl)but-3-en-1-yl)carbamate ( <b>3h</b> ), <sup>1</sup> H              | 18    |
| Benzyl-(1-(thiophen-3-yl)but-3-en-1-yl)carbamate ( <b>3h</b> ), <sup>13</sup> C             | 19    |
| Benzyl-(1-(naphthalen-1-yl)but-3-en-1-yl)carbamate ( <b>3i</b> ), <sup>1</sup> H            | 20    |
| Benzyl-(1-(naphthalen-1-yl)but-3-en-1-yl)carbamate ( <b>3i</b> ), <sup>13</sup> C           | 21    |
| (E)-Benzyl (1-phenylhexa-1,5-dien-3-yl)carbamate ( <b>3j</b> ), <sup>1</sup> H              | 22    |
| (E)-Benzyl (1-phenylhexa-1,5-dien-3-yl)carbamate ( <b>3j</b> ), <sup>13</sup> C             | 23    |
| Benzyl (1-phenylhex-5-en-1-yn-3-yl)carbamate ( <b>3k</b> ), <sup>1</sup> H                  | 24    |
| Benzyl (1-phenylhex-5-en-1-yn-3-yl)carbamate ( <b>3k</b> ), <sup>13</sup> C                 | 25    |

|                                                                                           |    |
|-------------------------------------------------------------------------------------------|----|
| Benzyl (1-cyclohexylbut-3-en-1-yl)carbamate ( <b>3l</b> ), <sup>1</sup> H                 | 26 |
| Benzyl (1-cyclohexylbut-3-en-1-yl)carbamate ( <b>3l</b> ), <sup>13</sup> C                | 27 |
| Benzyl (6-methylhept-1-en-4-yl)carbamate ( <b>3m</b> ), <sup>1</sup> H                    | 28 |
| Benzyl (6-methylhept-1-en-4-yl)carbamate ( <b>3m</b> ), <sup>13</sup> C                   | 29 |
| Benzyl (1-phenylpent-4-en-2-yl)carbamate ( <b>3n</b> ), <sup>1</sup> H                    | 30 |
| Benzyl (1-phenylpent-4-en-2-yl)carbamate ( <b>3n</b> ), <sup>13</sup> C                   | 31 |
| Benzyl (1-phenylhex-5-en-3-yl)carbamate ( <b>3o</b> ), <sup>1</sup> H                     | 32 |
| Benzyl (1-phenylhex-5-en-3-yl)carbamate ( <b>3o</b> ), <sup>13</sup> C                    | 33 |
| Benzyl (1-phenylhex-5-en-3-yl)carbamate ( <b>3o</b> ), DEPT 135                           | 34 |
| Ethyl (1-phenylbut-3-en-1-yl)carbamate ( <b>3p</b> ), <sup>1</sup> H                      | 35 |
| Ethyl (1-phenylbut-3-en-1-yl)carbamate ( <b>3p</b> ), <sup>13</sup> C                     | 36 |
| Benzyl (1-allylcyclohexyl)carbamate ( <b>6a</b> ), <sup>1</sup> H                         | 37 |
| Benzyl (1-allylcyclohexyl)carbamate ( <b>6a</b> ), <sup>13</sup> C                        | 38 |
| Ethyl (1-allylcyclohexyl)carbamate ( <b>6b</b> ), <sup>1</sup> H                          | 39 |
| Ethyl (1-allylcyclohexyl)carbamate ( <b>6b</b> ), <sup>13</sup> C                         | 40 |
| Benzyl (1-allyl-2-methylcyclohexyl)carbamate ( <b>6c</b> ), <sup>1</sup> H                | 41 |
| Benzyl (1-allyl-2-methylcyclohexyl)carbamate ( <b>6c</b> ), <sup>13</sup> C               | 42 |
| Benzyl ((1r,4r)-1-allyl-4-methylcyclohexyl)carbamate ( <b>6d</b> ), <sup>1</sup> H        | 43 |
| Benzyl ((1r,4r)-1-allyl-4-methylcyclohexyl)carbamate ( <b>6d</b> ), <sup>13</sup> C       | 44 |
| Benzyl ((1r,4r)-1-allyl-4-methylcyclohexyl)carbamate ( <b>6d</b> ), DEPT 135              | 45 |
| Benzyl ((1r,4r)-1-allyl-4-hydroxycyclohexyl)carbamate ( <b>6e</b> ), <sup>1</sup> H       | 46 |
| Benzyl ((1r,4r)-1-allyl-4-hydroxycyclohexyl)carbamate ( <b>6e</b> ), <sup>13</sup> C      | 47 |
| Benzyl ((1r,4r)-1-allyl-4-hydroxycyclohexyl)carbamate ( <b>6e</b> ), DEPT 135             | 48 |
| Benzyl ((1r,4r)-1-allyl-4-(tert-butyl)cyclohexyl)carbamate ( <b>6f</b> ), <sup>1</sup> H  | 49 |
| Benzyl ((1r,4r)-1-allyl-4-(tert-butyl)cyclohexyl)carbamate ( <b>6f</b> ), <sup>13</sup> C | 50 |
| Ethyl ((1r,4r)-1-allyl-4-(tert-butyl)cyclohexyl)carbamate ( <b>6g</b> ), <sup>1</sup> H   | 51 |
| Ethyl ((1r,4r)-1-allyl-4-(tert-butyl)cyclohexyl)carbamate ( <b>6g</b> ), <sup>13</sup> C  | 52 |
| Benzyl (1-allylcycloheptyl)carbamate ( <b>6h</b> ), <sup>1</sup> H                        | 53 |
| Benzyl (1-allylcycloheptyl)carbamate ( <b>6h</b> ), <sup>13</sup> C                       | 54 |
| Benzyl (1-allylcycloheptyl)carbamate ( <b>6h</b> ), DEPT 135                              | 55 |
| Benzyl ((1r,3r,5r,7r)-2-allyladamantan-2-yl)carbamate ( <b>6i</b> ), <sup>1</sup> H       | 56 |
| Benzyl ((1r,3r,5r,7r)-2-allyladamantan-2-yl)carbamate ( <b>6i</b> ), <sup>13</sup> C      | 57 |
| Benzyl (3-methyl-1-phenylhex-5-en-3-yl)carbamate ( <b>6j</b> ), <sup>1</sup> H            | 58 |

|                                                                                 |    |
|---------------------------------------------------------------------------------|----|
| Benzyl (3-methyl-1-phenylhex-5-en-3-yl)carbamate ( <b>6j</b> ), <sup>13</sup> C | 59 |
| Benzyl (3-ethyl-1-phenylhex-5-en-3-yl)carbamate ( <b>6k</b> ), <sup>1</sup> H   | 60 |
| Benzyl (3-ethyl-1-phenylhex-5-en-3-yl)carbamate ( <b>6k</b> ), <sup>13</sup> C  | 61 |
| Benzyl (4-methylnon-1-en-4-yl)carbamate ( <b>6l</b> ), <sup>1</sup> H           | 62 |
| Benzyl (4-methylnon-1-en-4-yl)carbamate ( <b>6l</b> ), <sup>13</sup> C          | 63 |
| Benzyl (4-methylpentadec-1-en-4-yl)carbamate ( <b>6m</b> ), <sup>1</sup> H      | 64 |
| Benzyl (4-methylpentadec-1-en-4-yl)carbamate ( <b>6m</b> ), <sup>13</sup> C     | 65 |
| Benzyl (4-ethylhept-1-en-4-yl)carbamate ( <b>6n</b> ), <sup>1</sup> H           | 66 |
| Benzyl (4-ethylhept-1-en-4-yl)carbamate ( <b>6n</b> ), <sup>13</sup> C          | 67 |
| Benzyl (4-ethylhept-1-en-4-yl)carbamate ( <b>6n</b> ), DEPT 135                 | 68 |

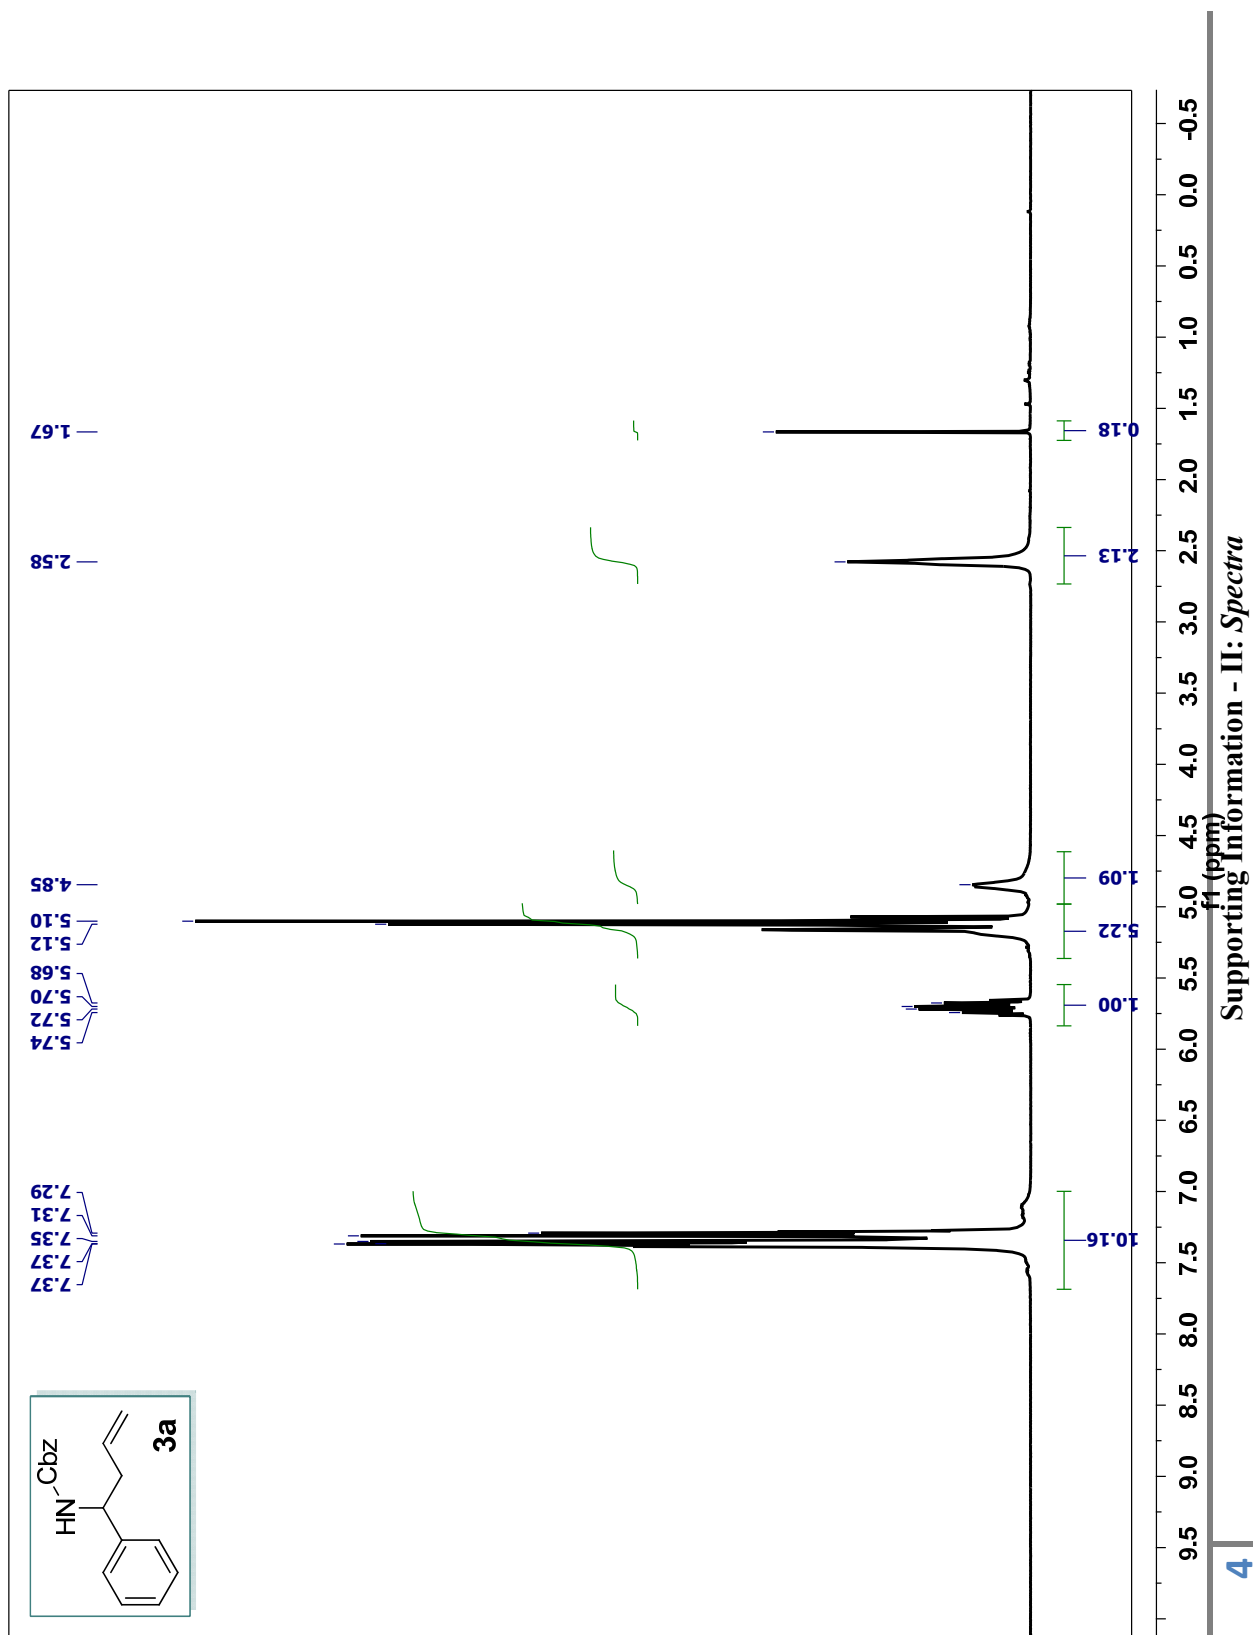

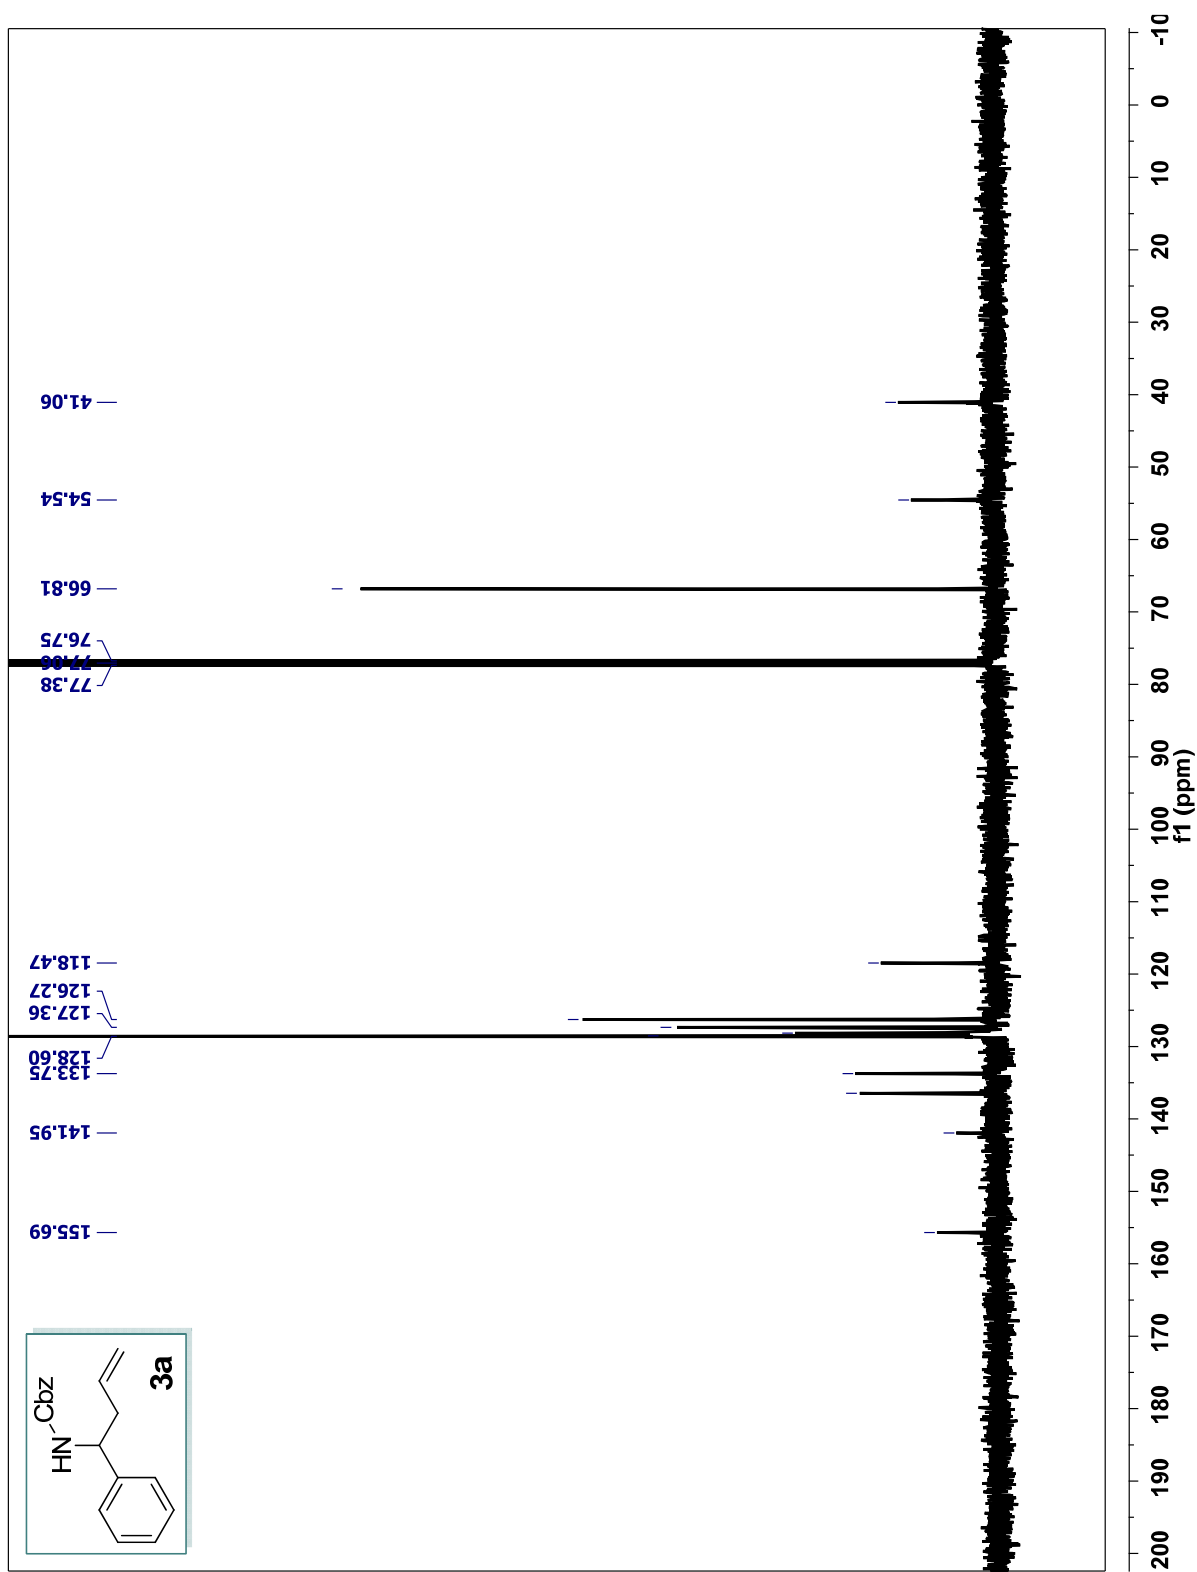

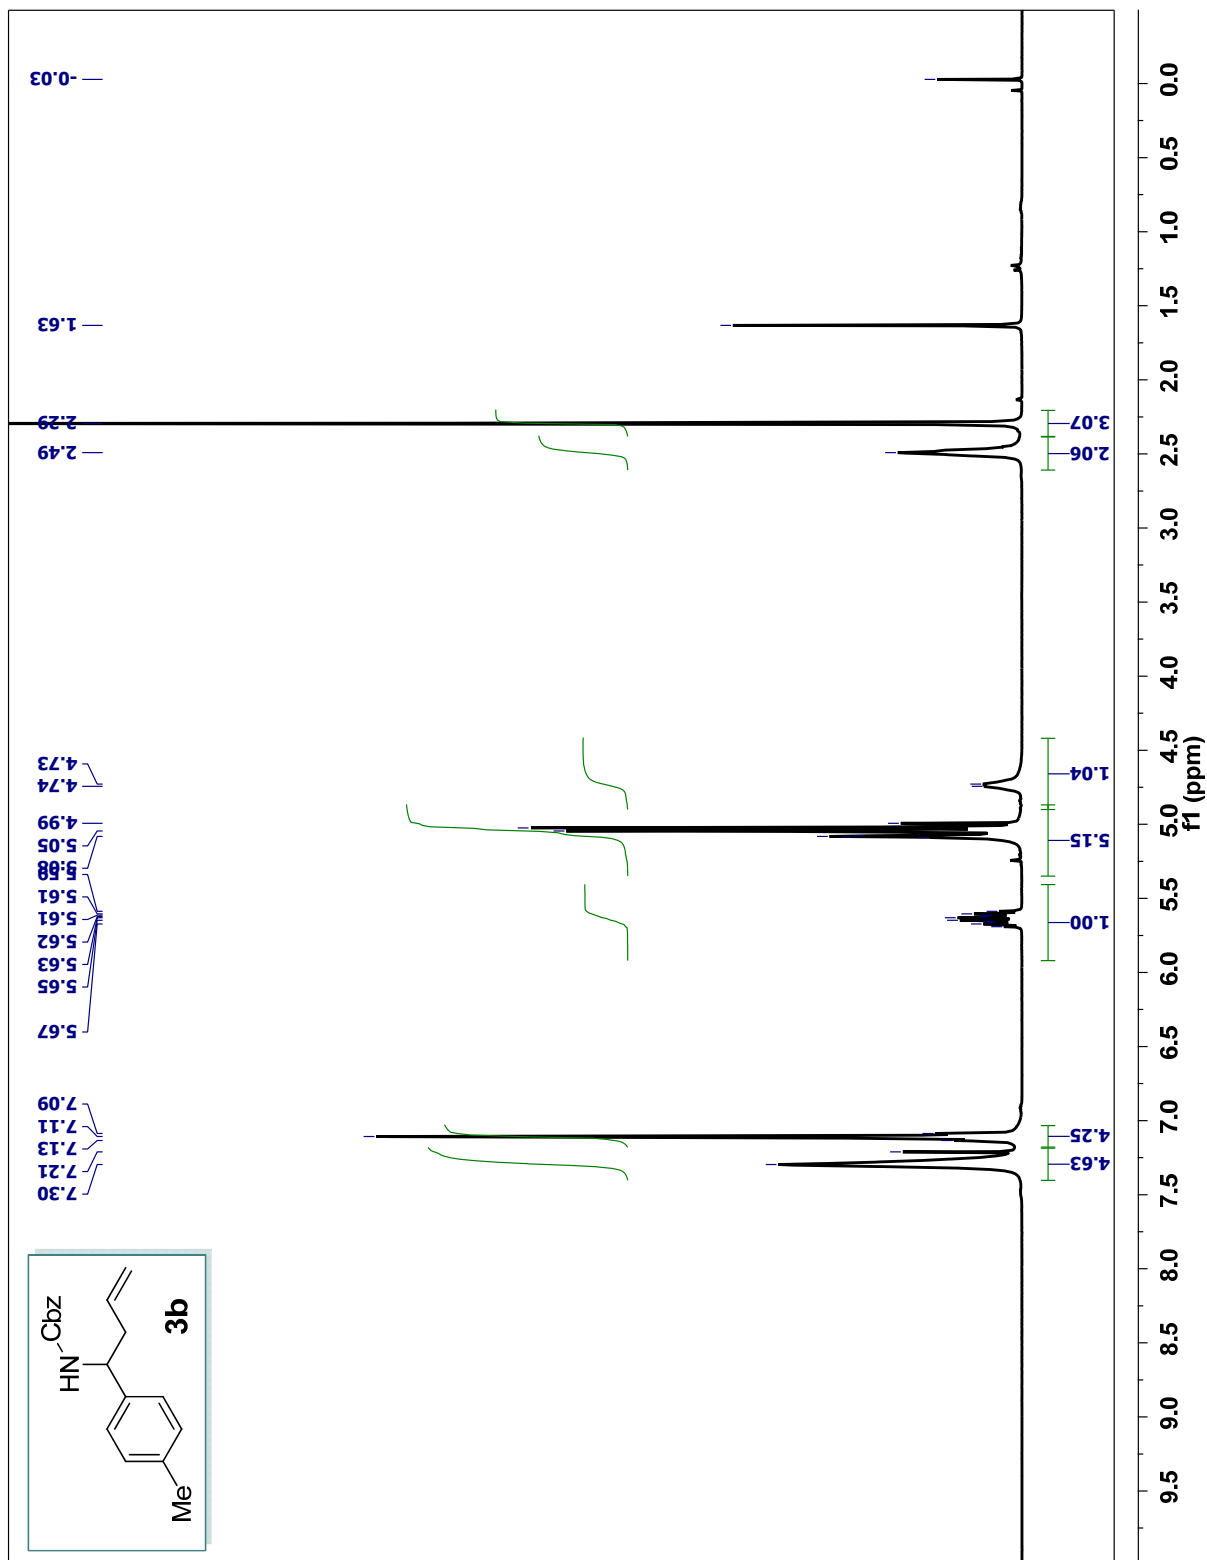

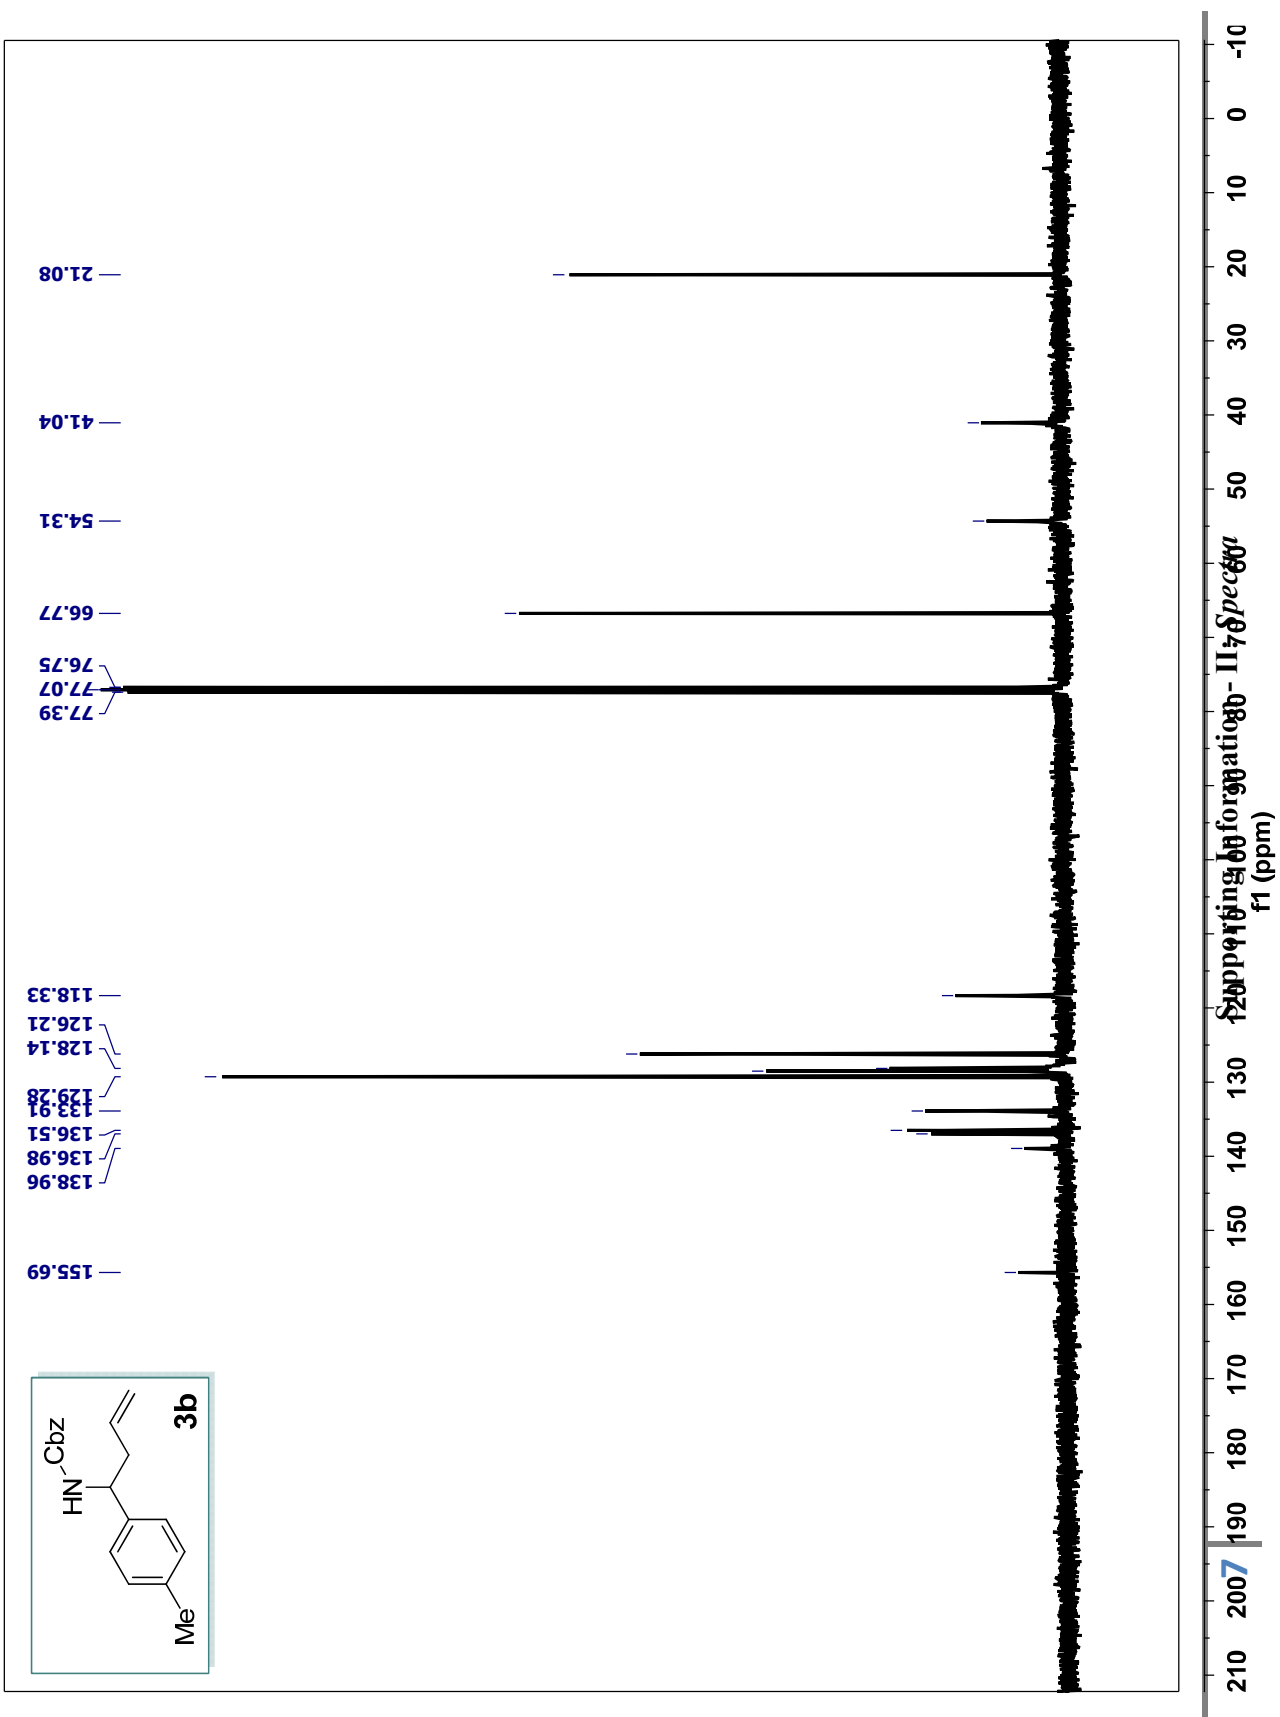

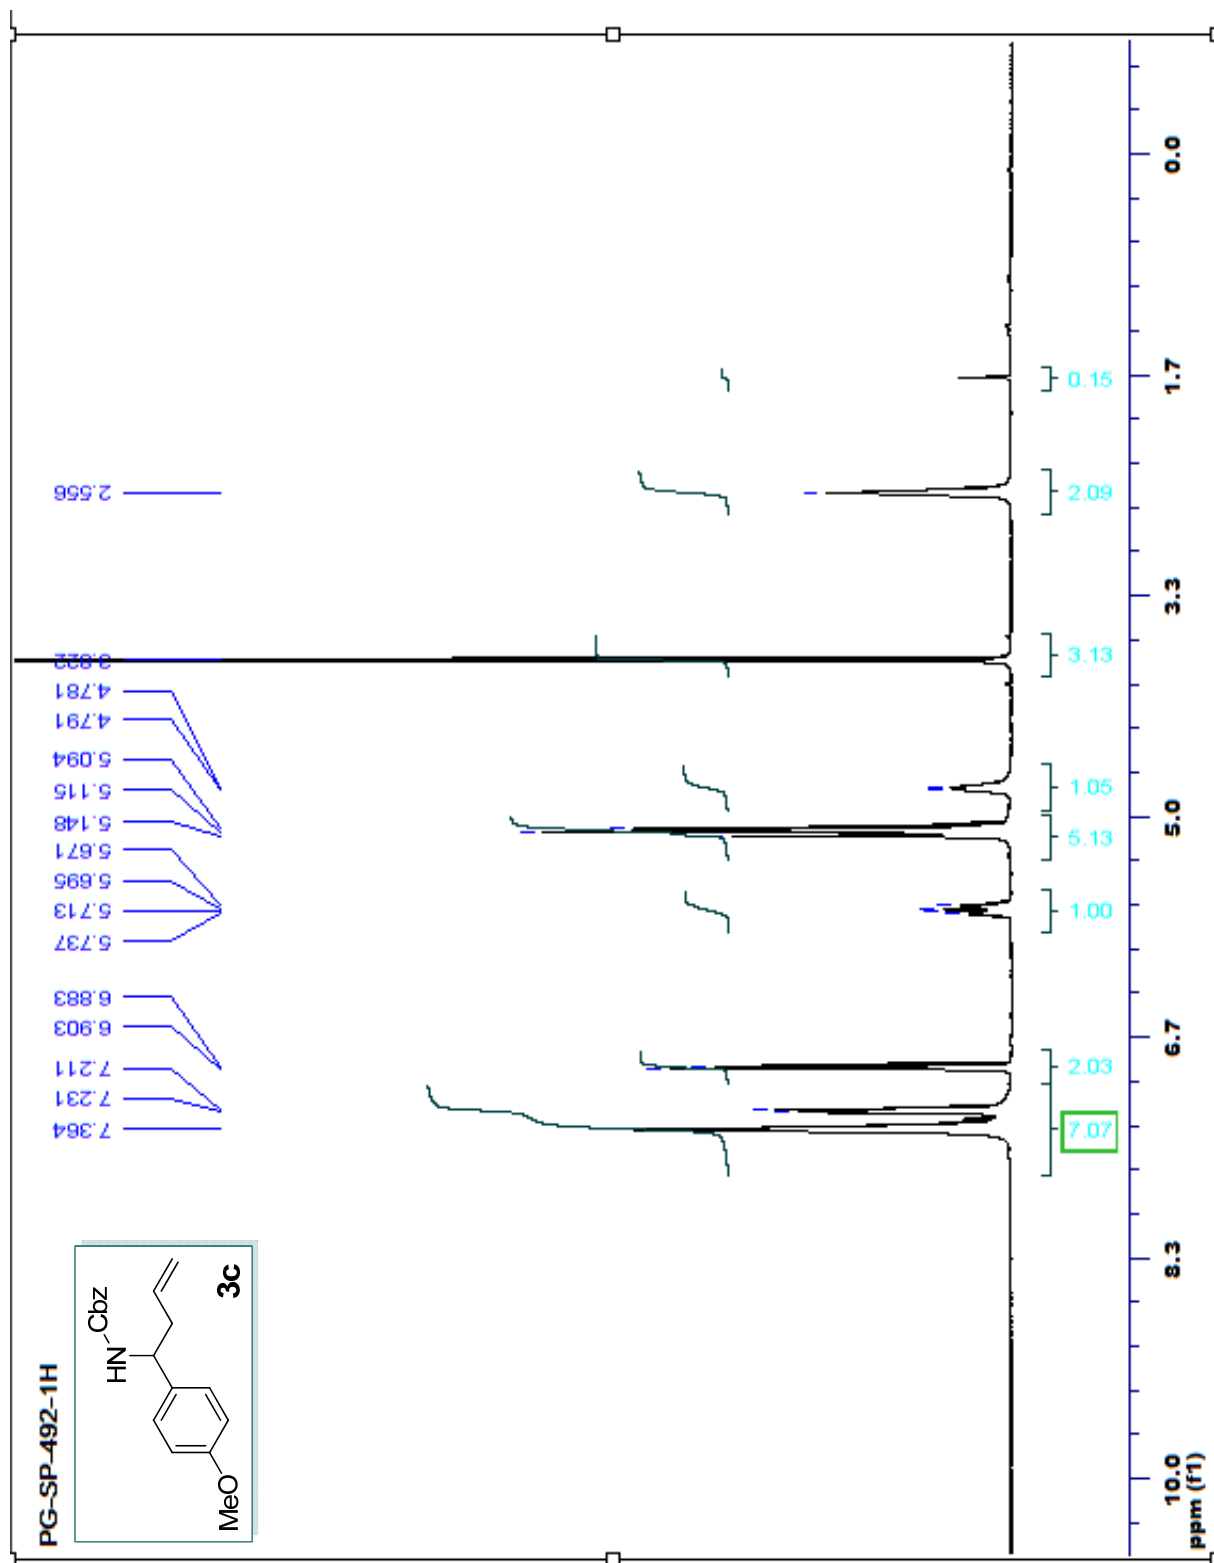



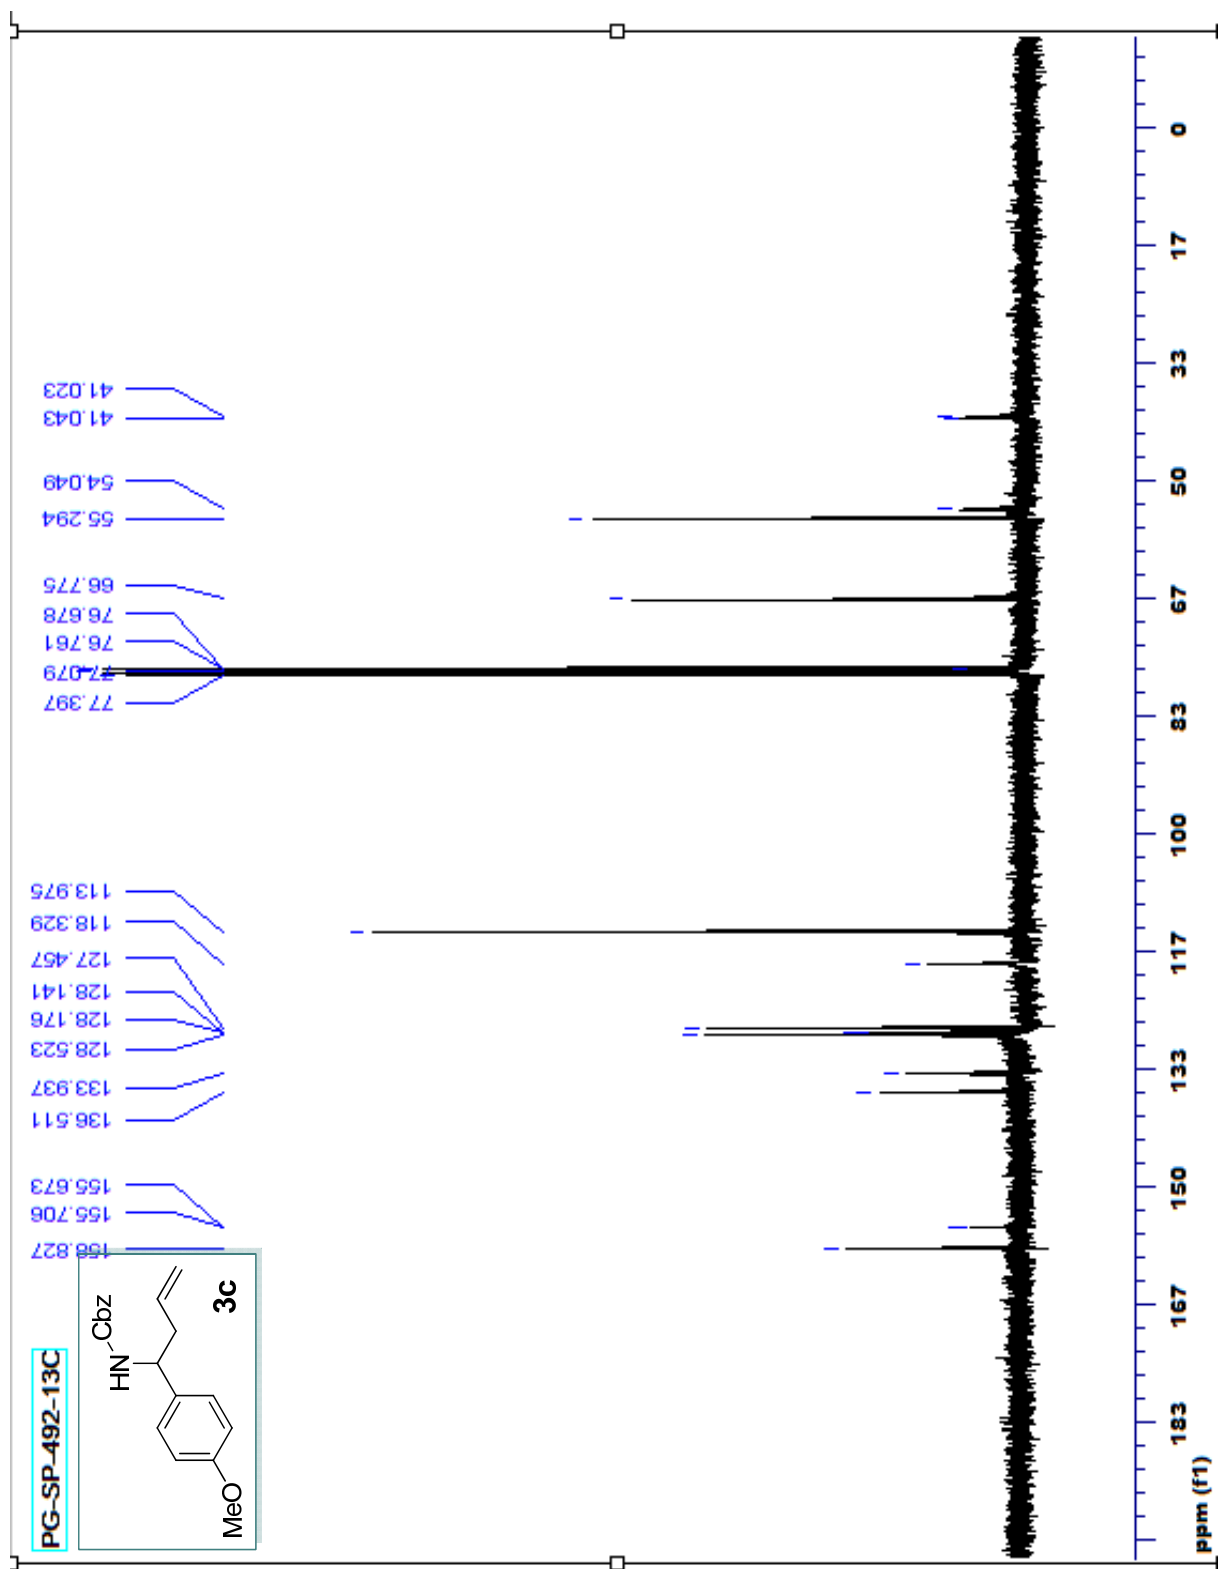

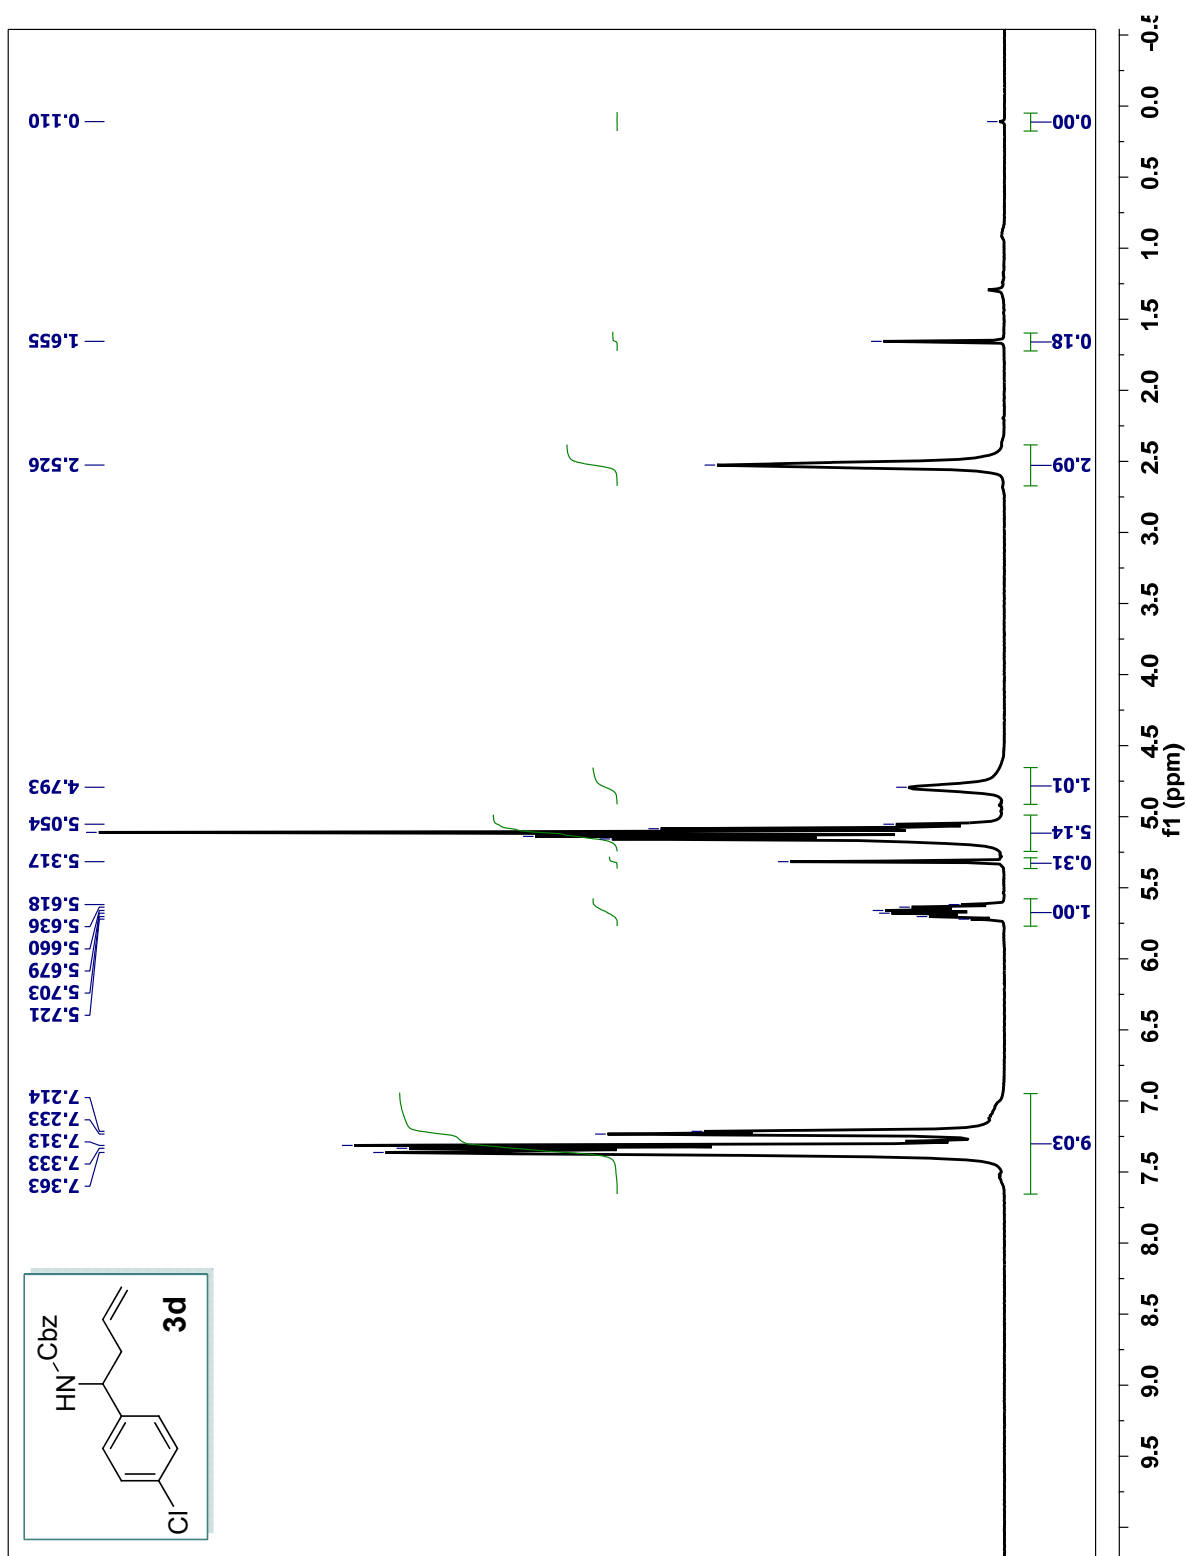

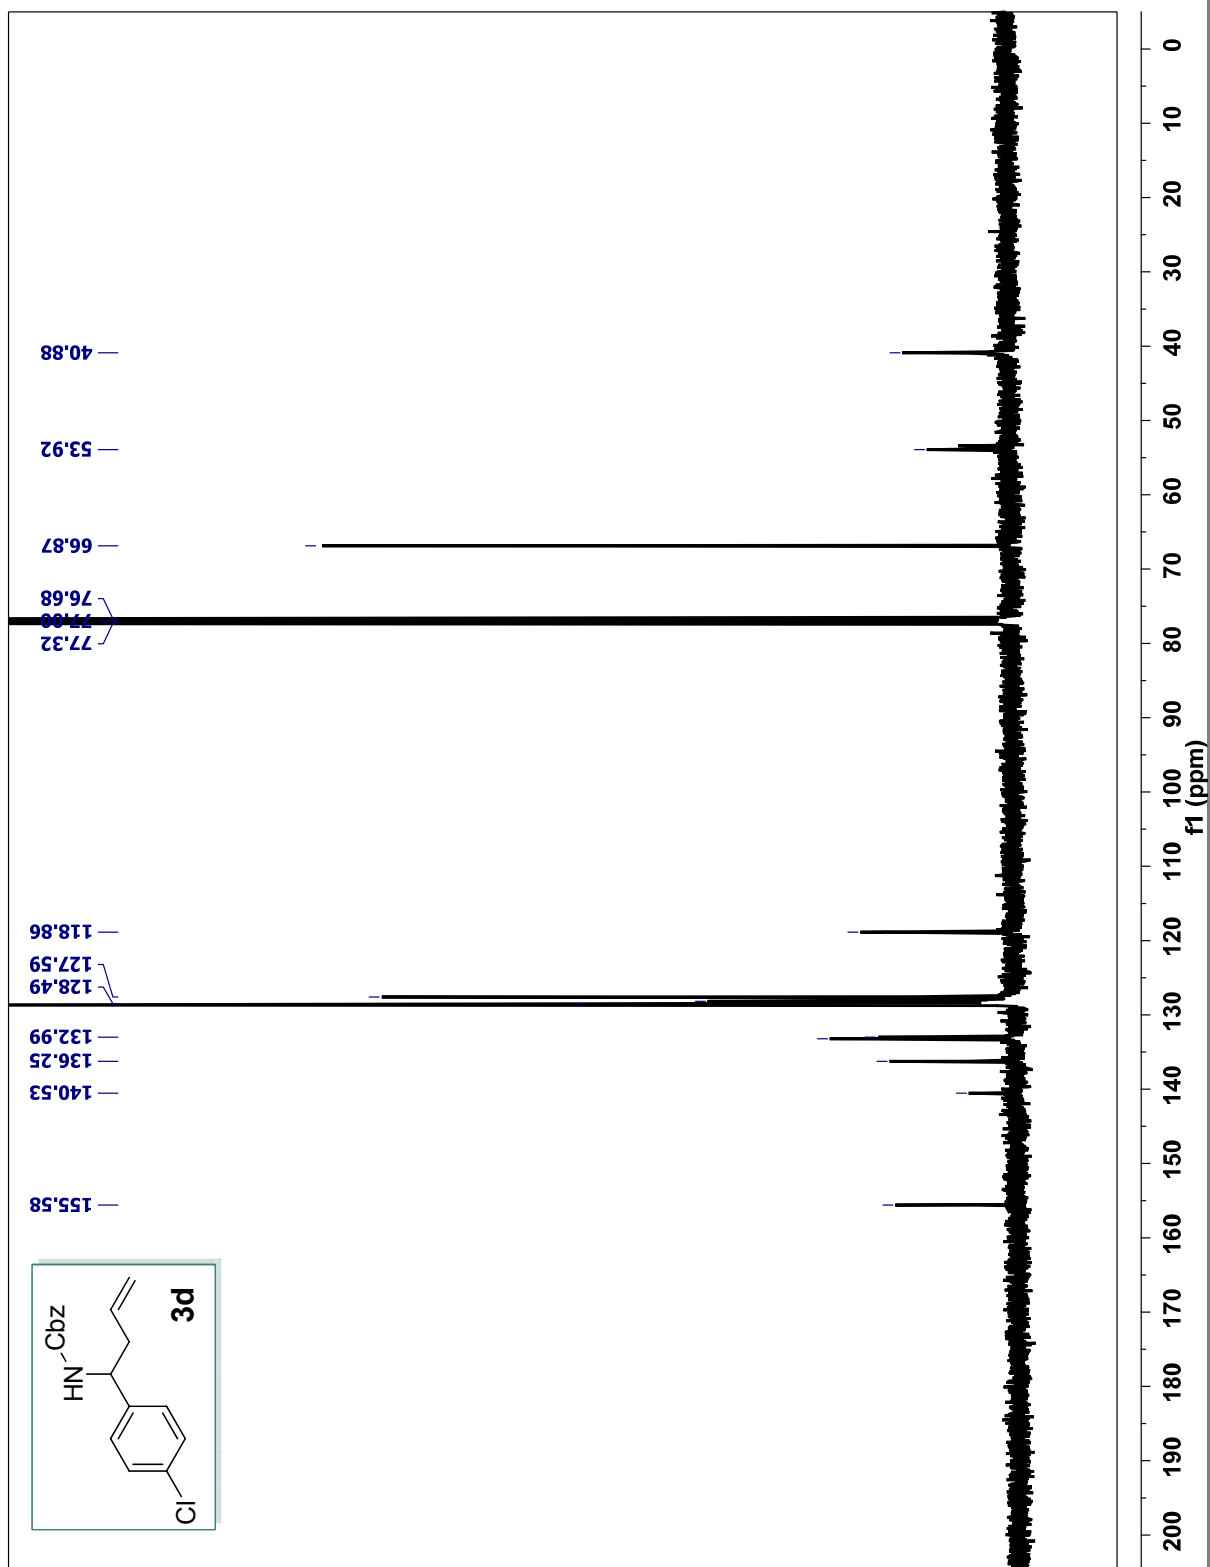

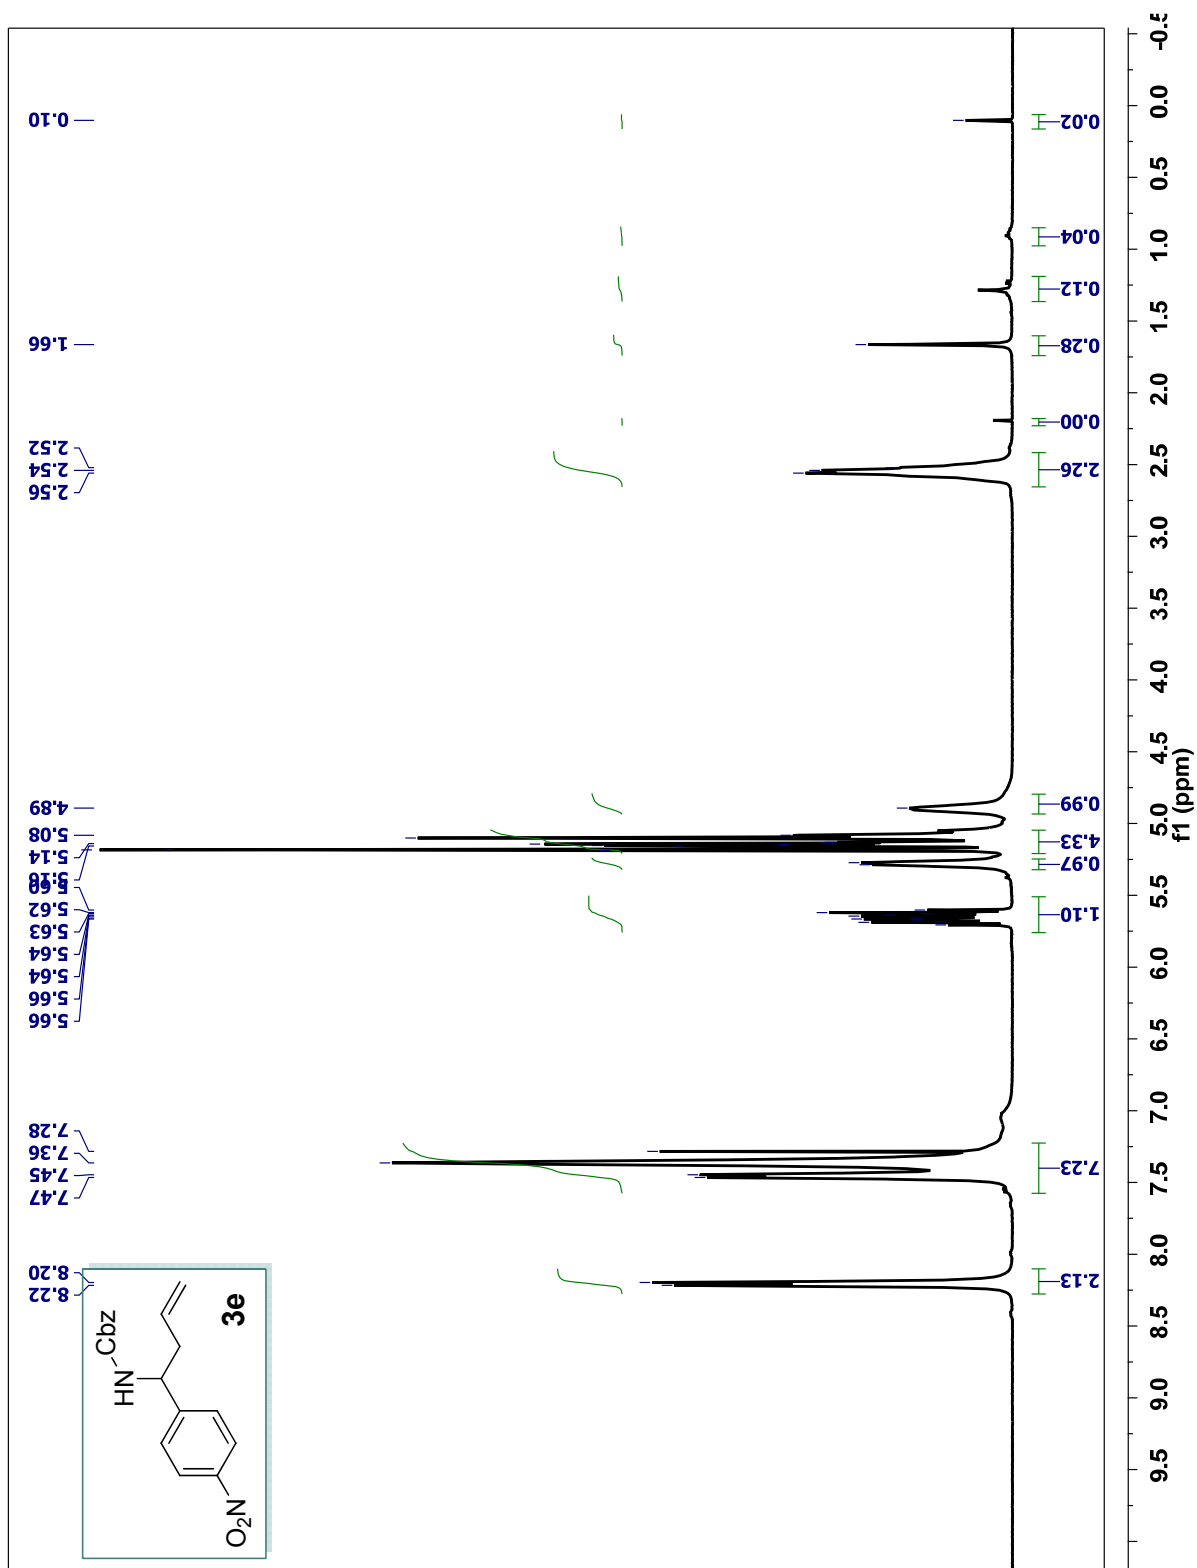

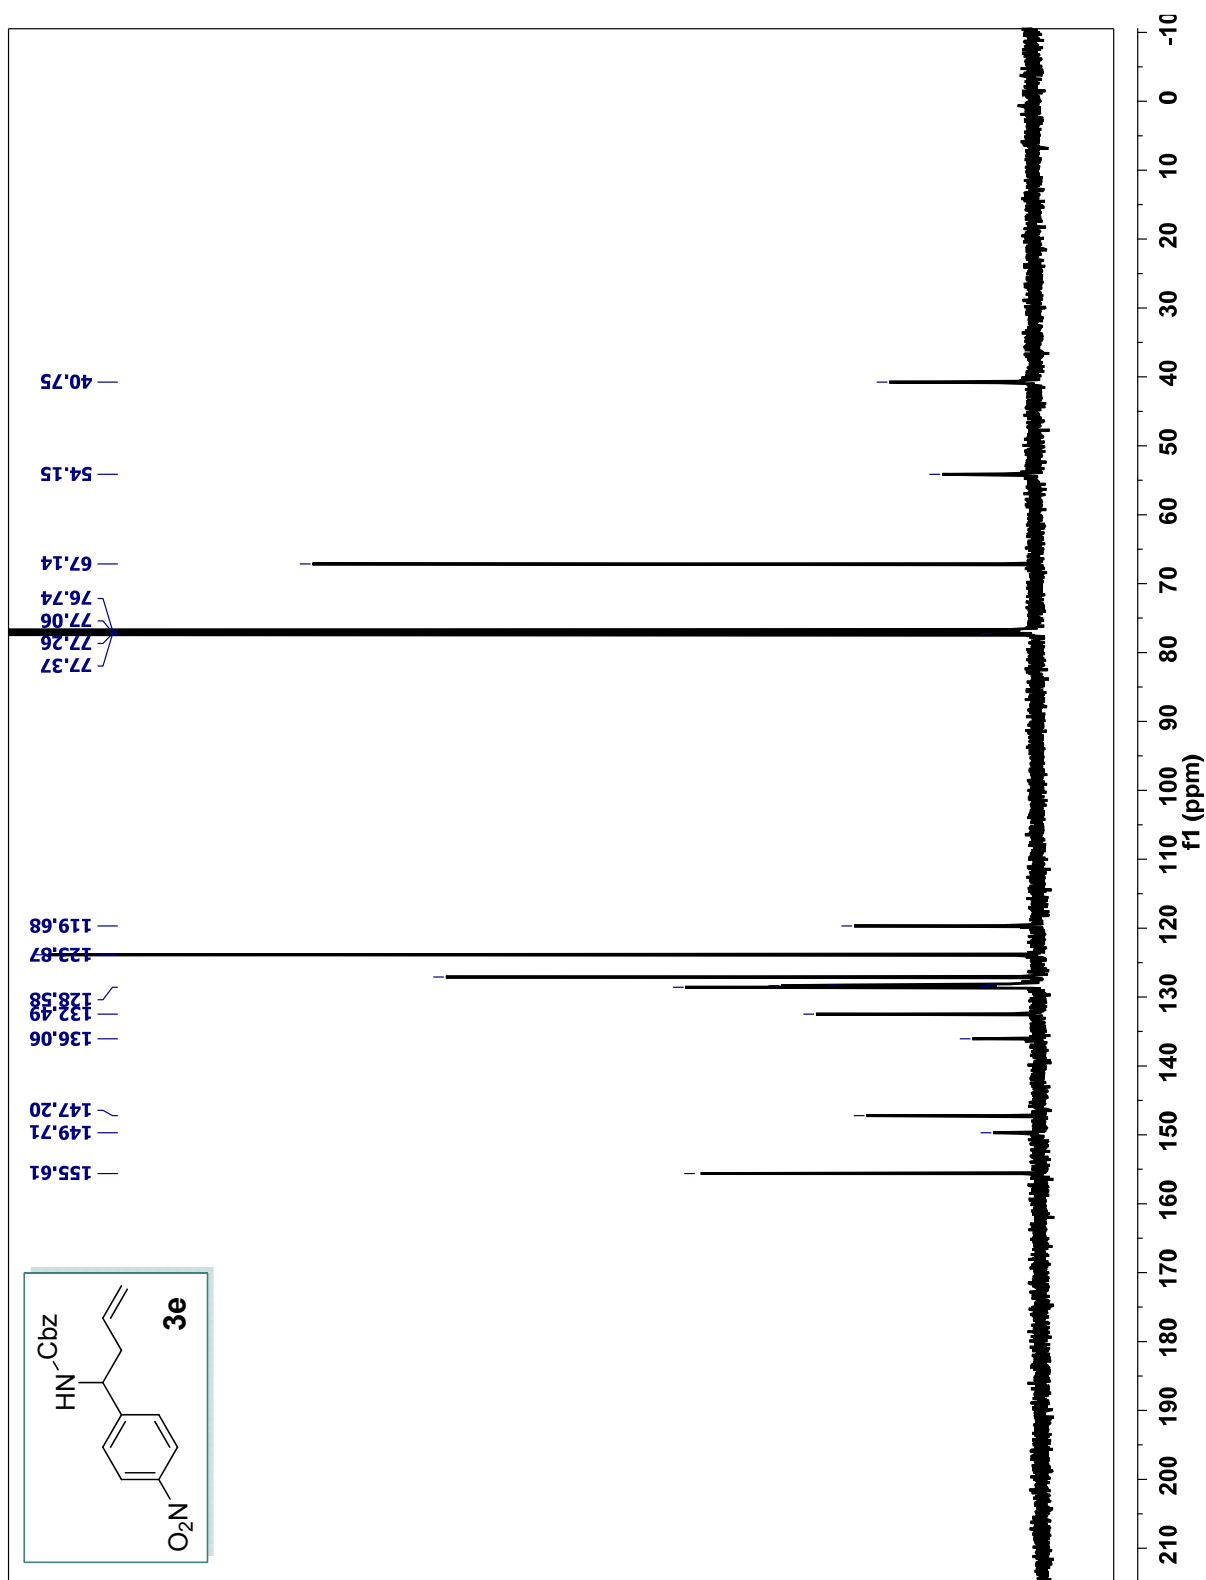

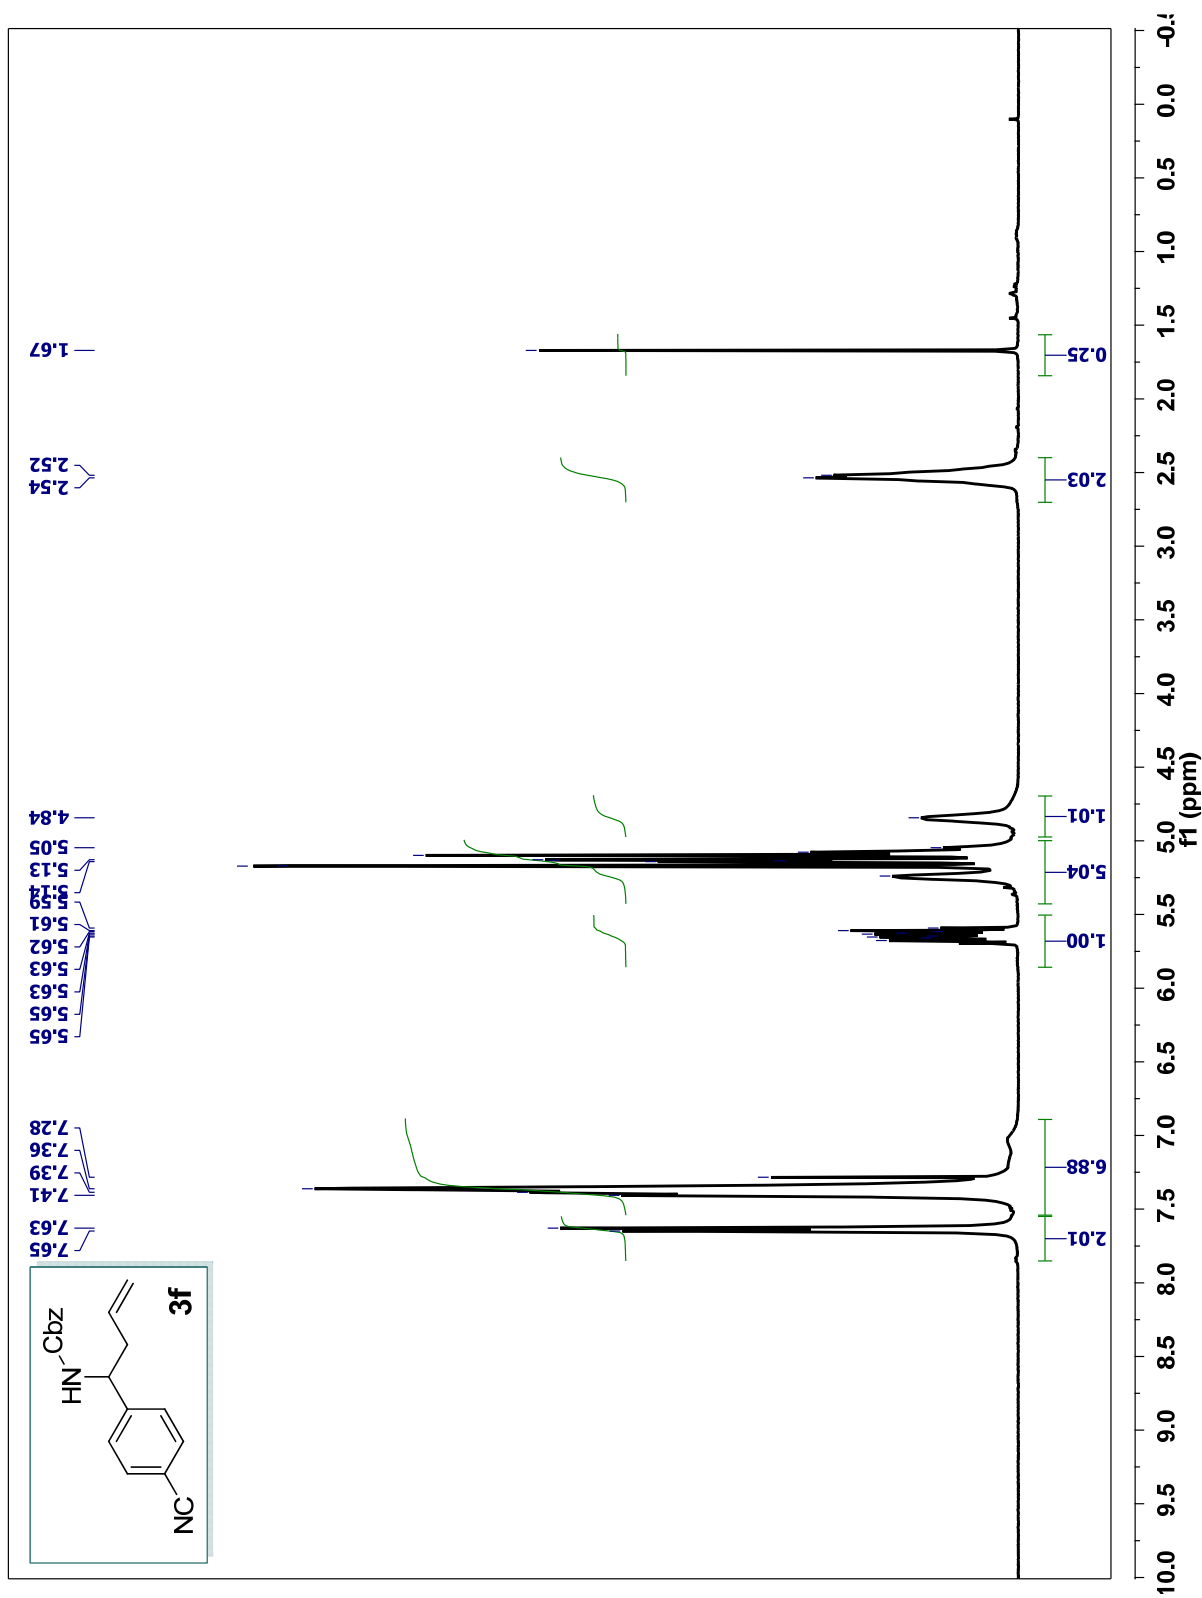

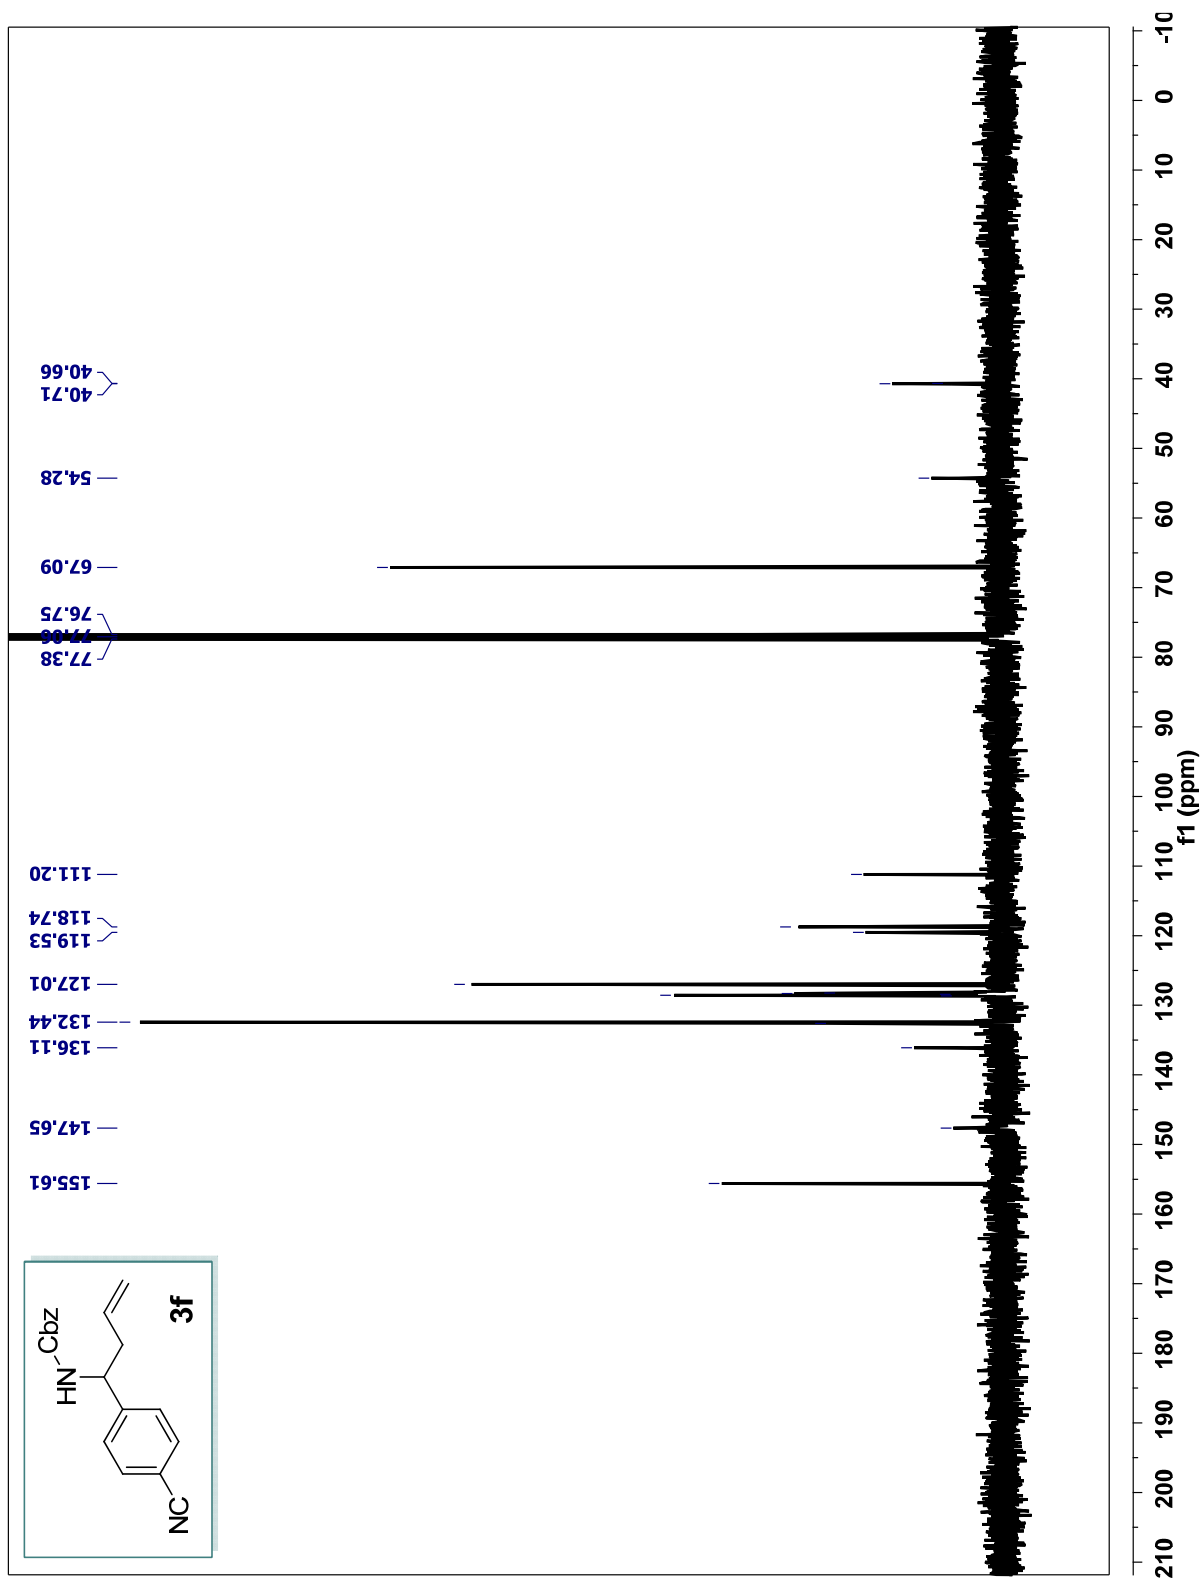

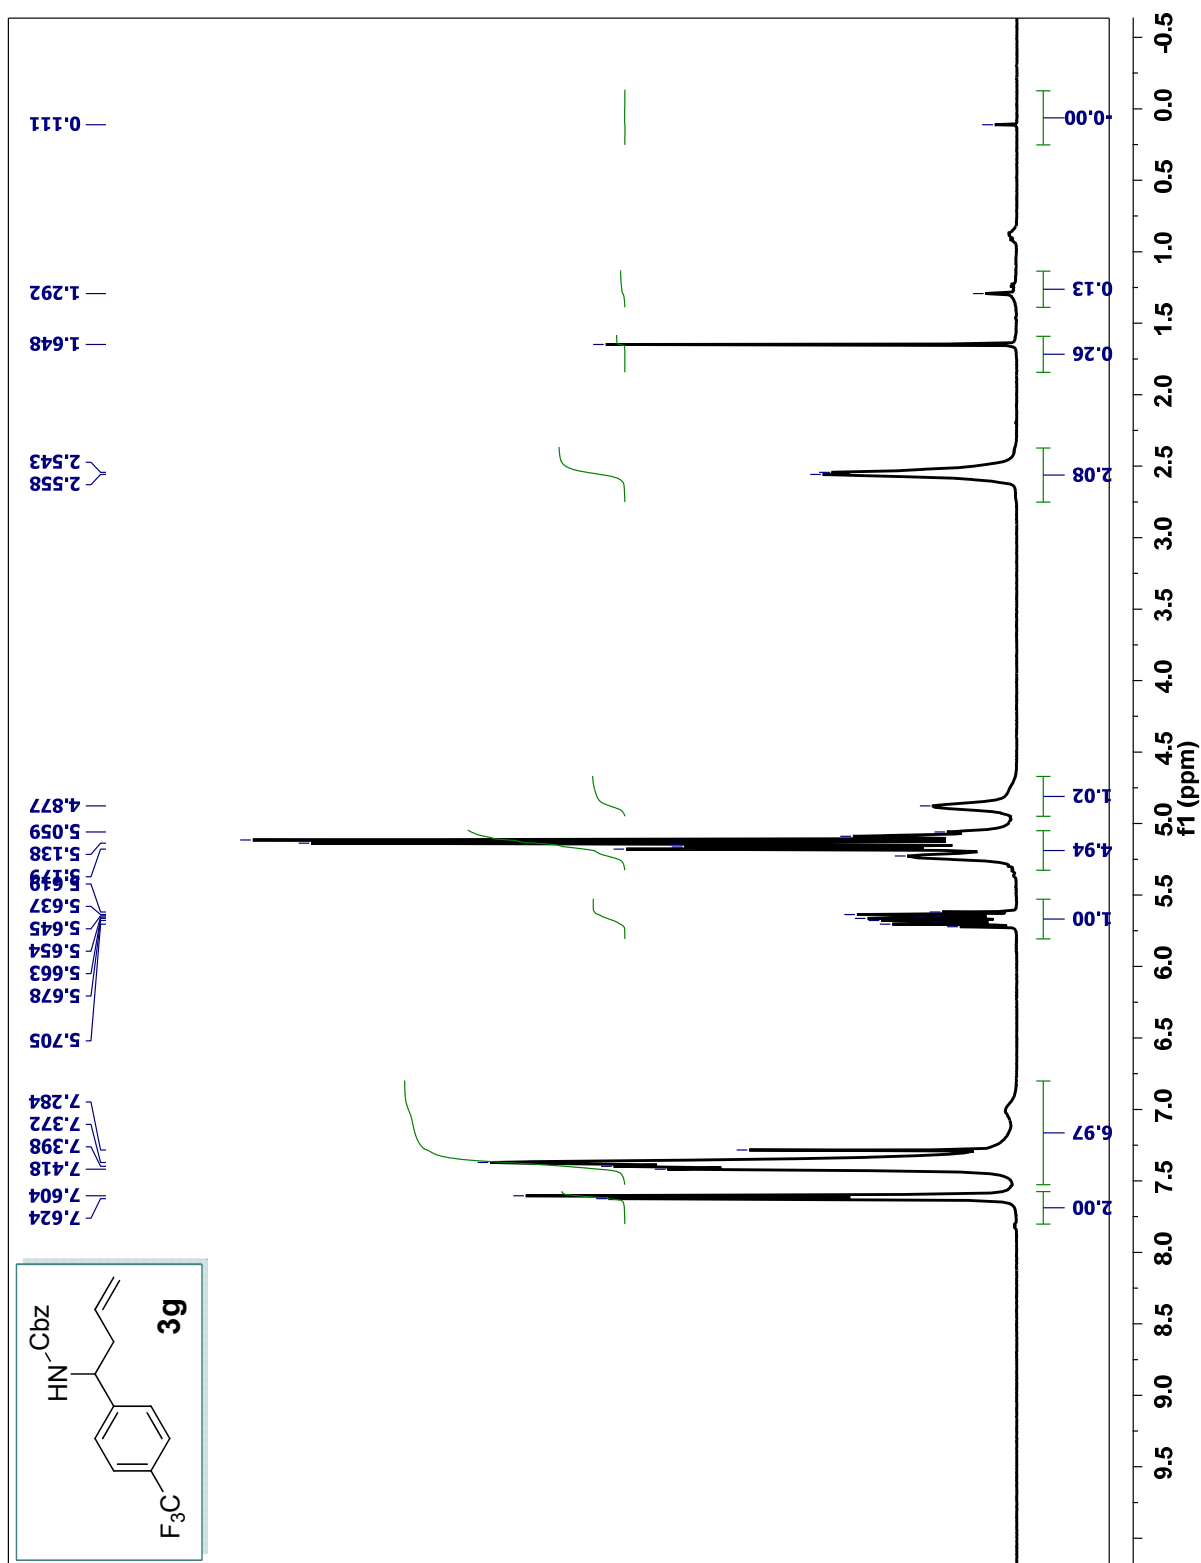



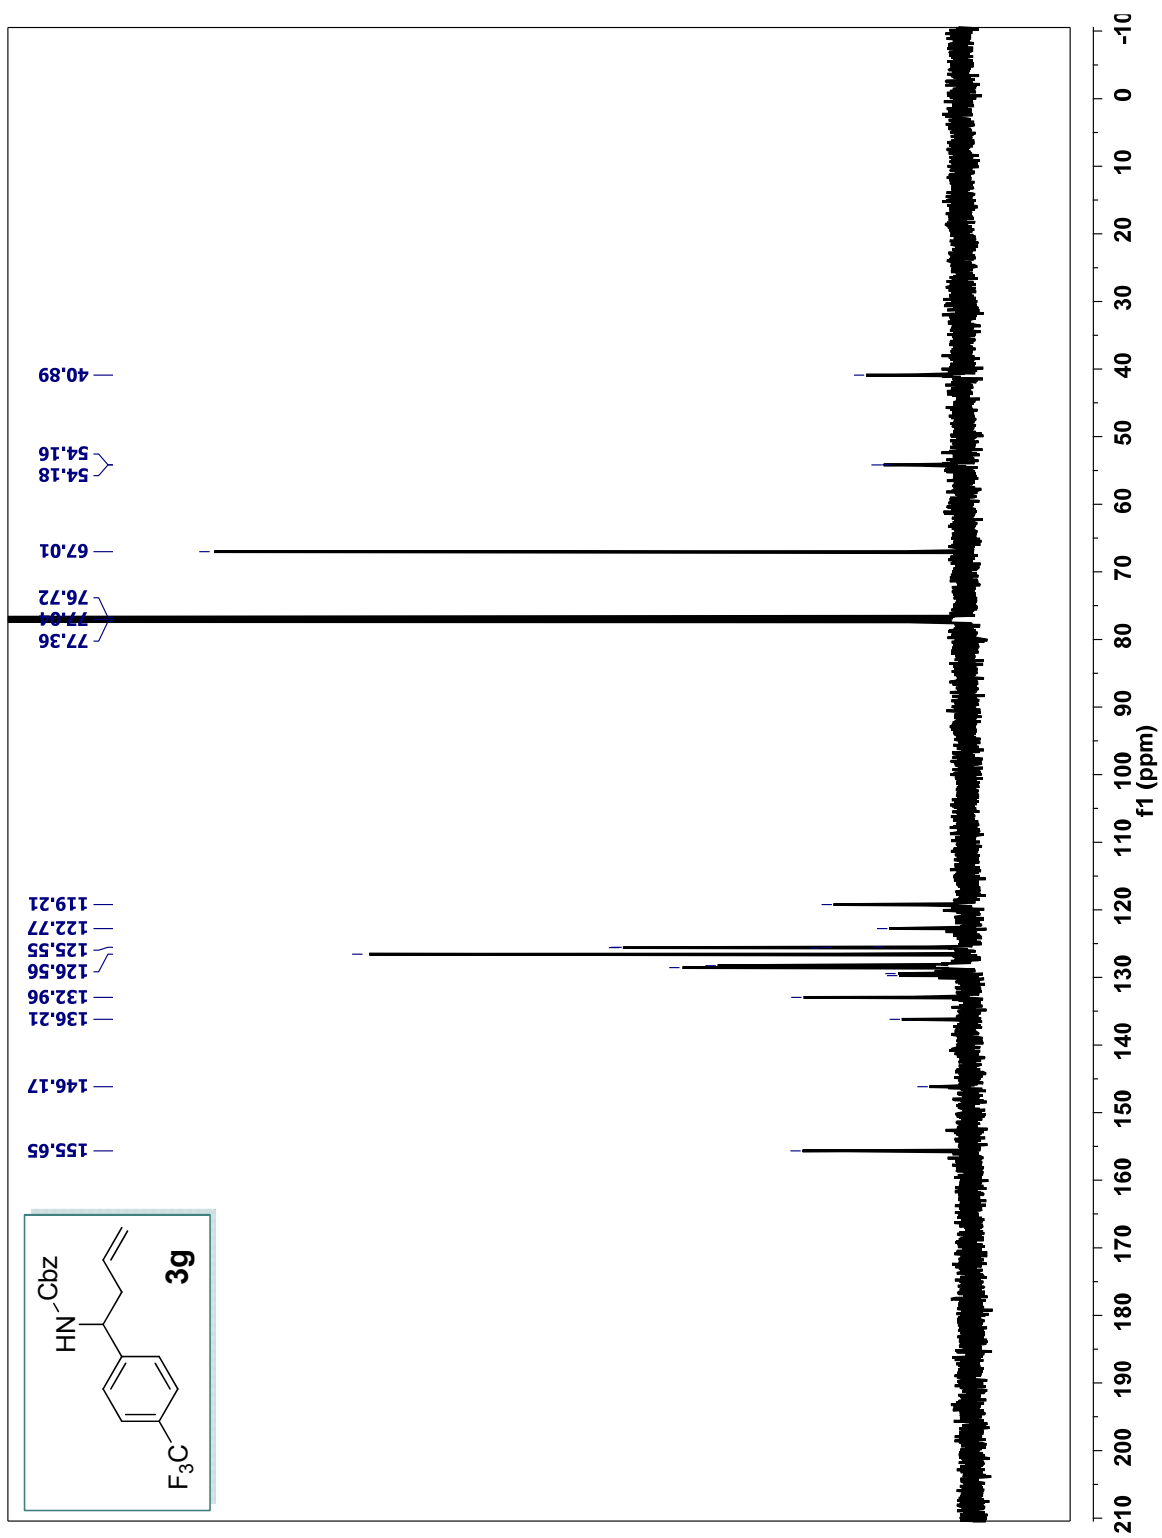

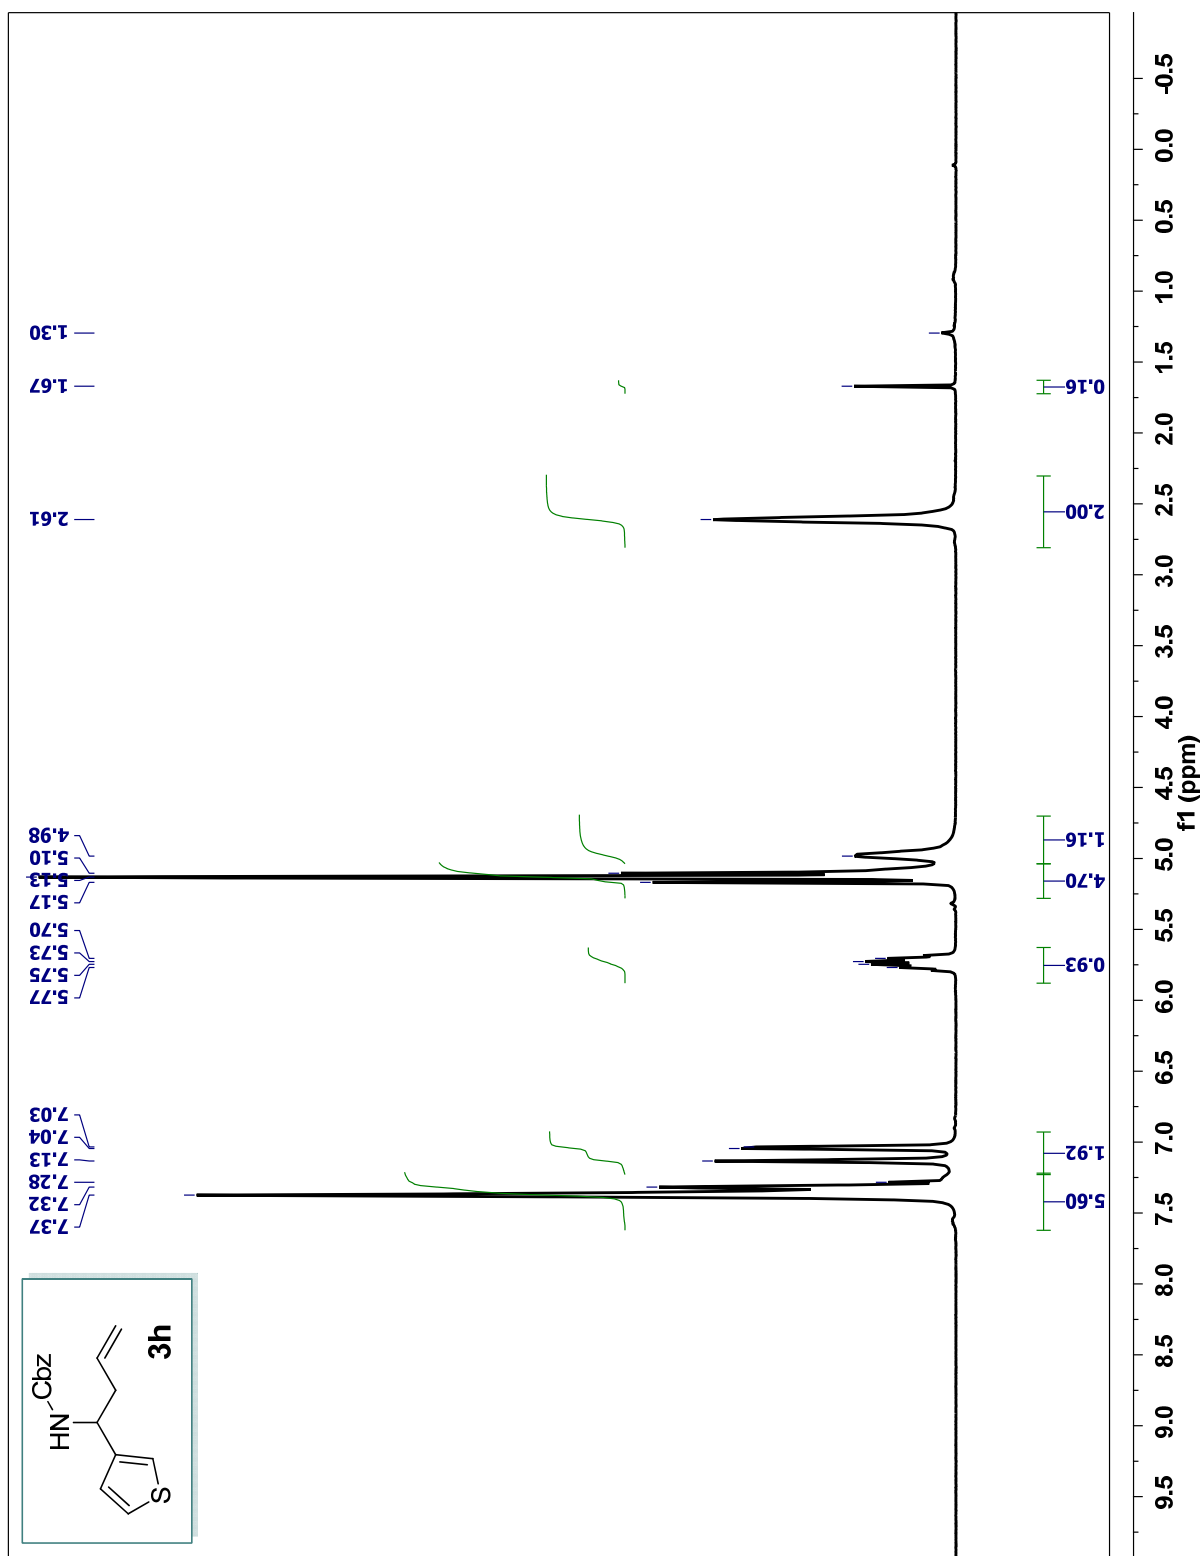

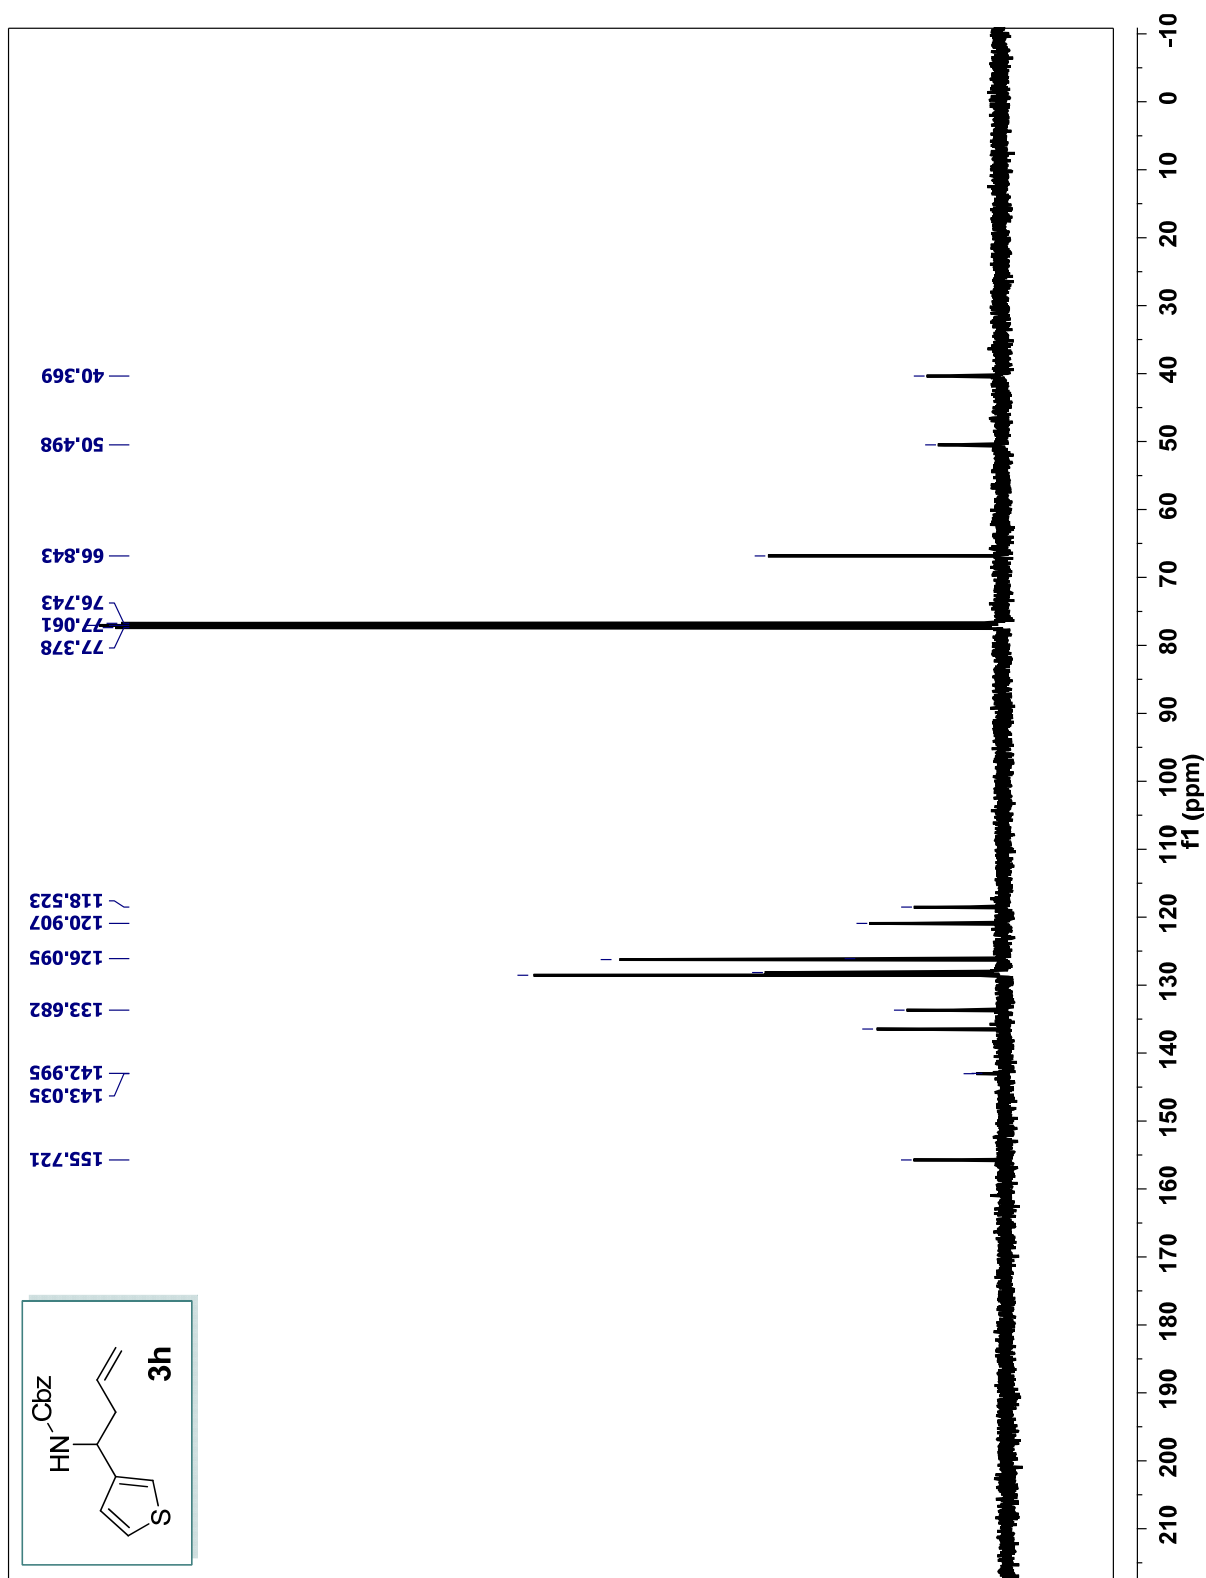

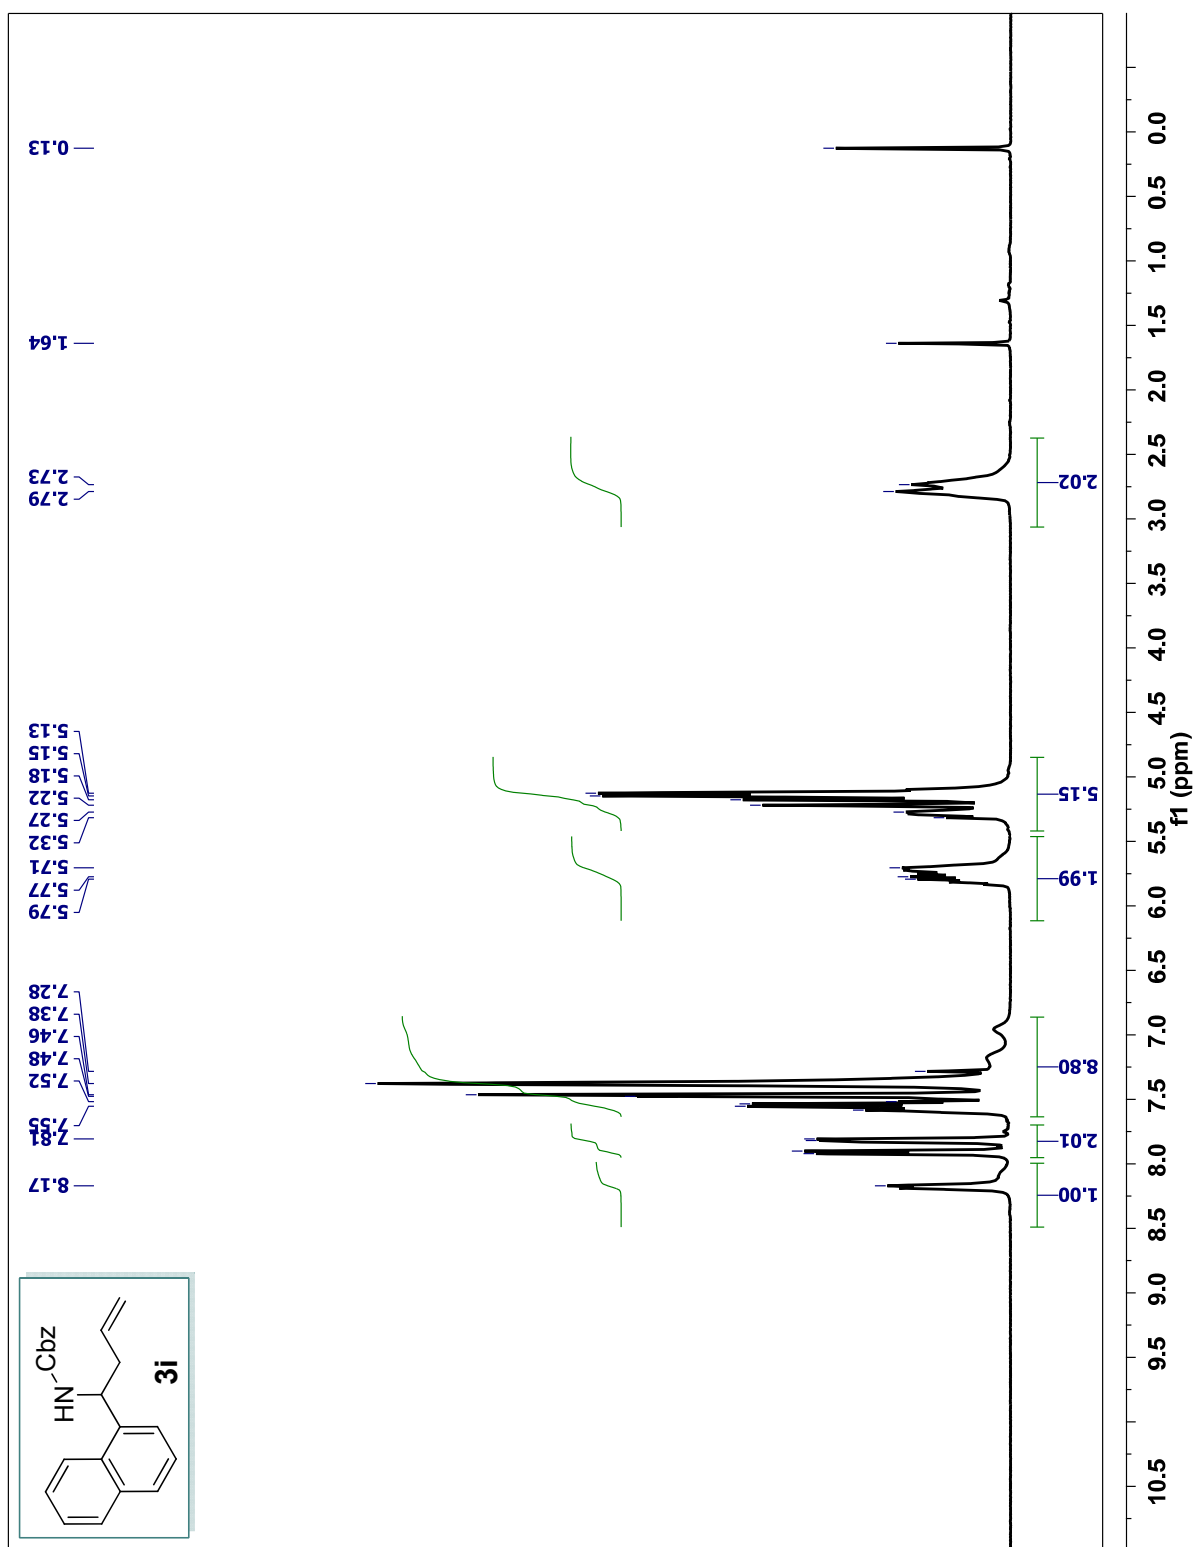

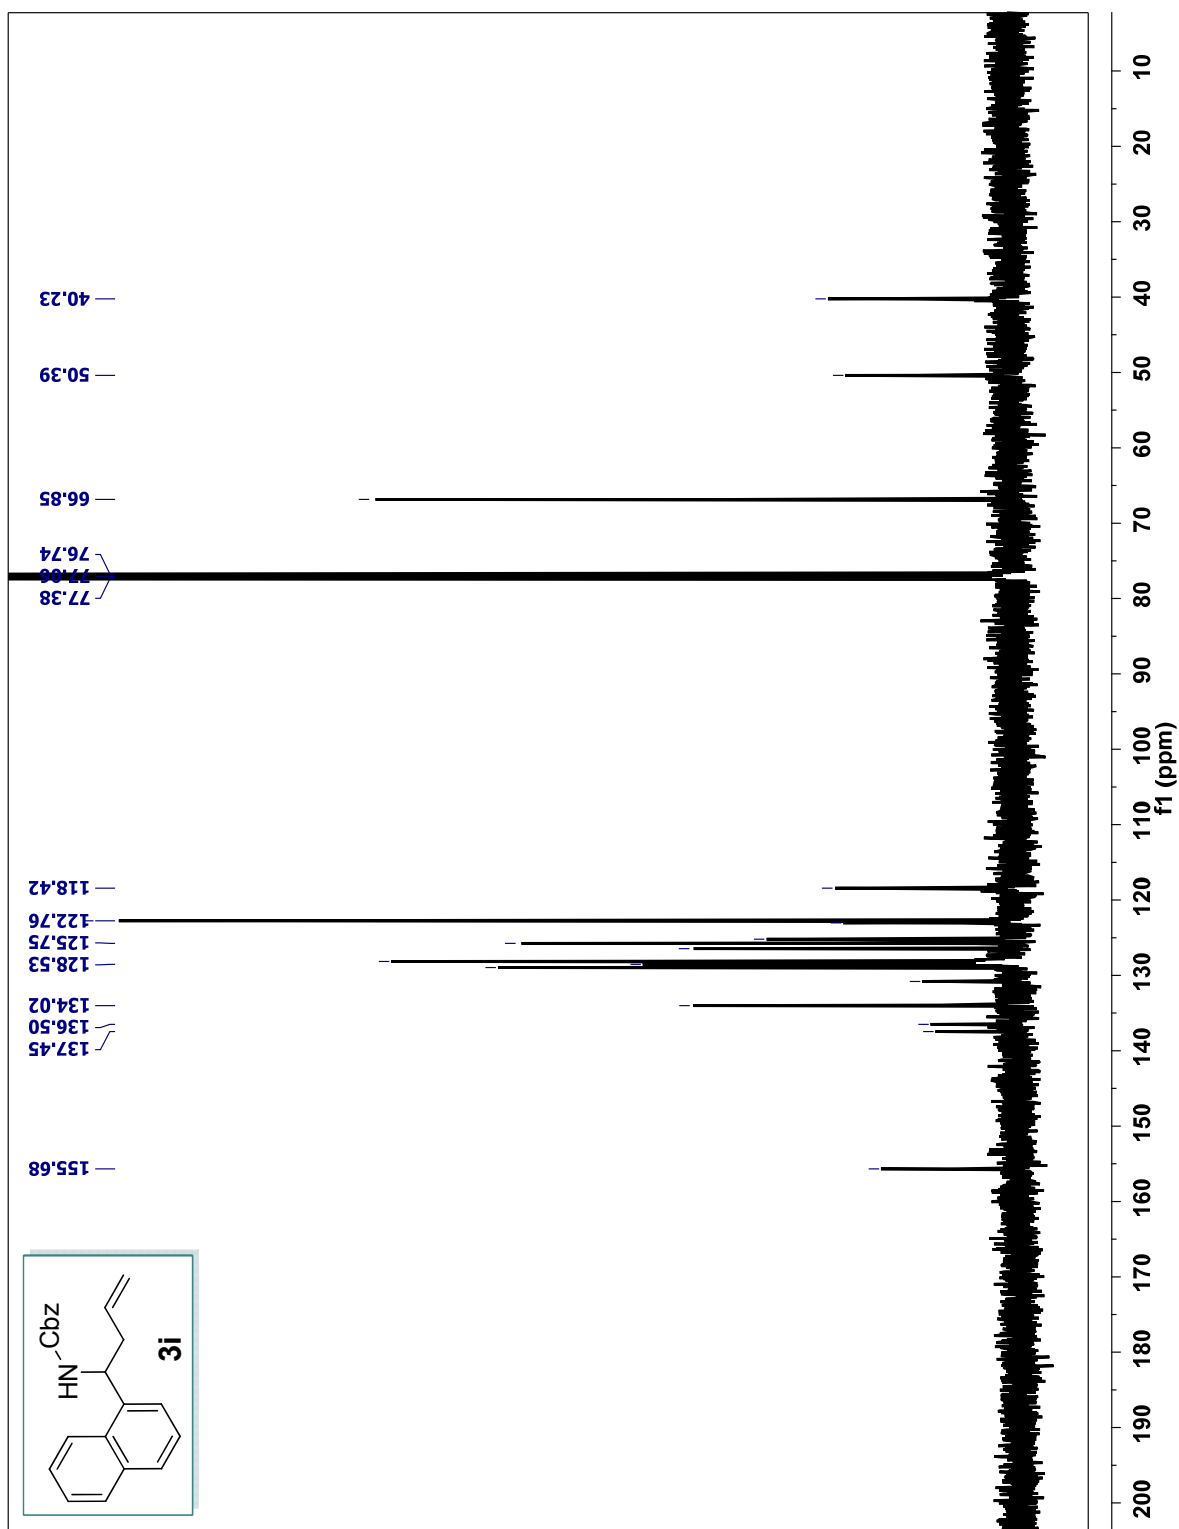

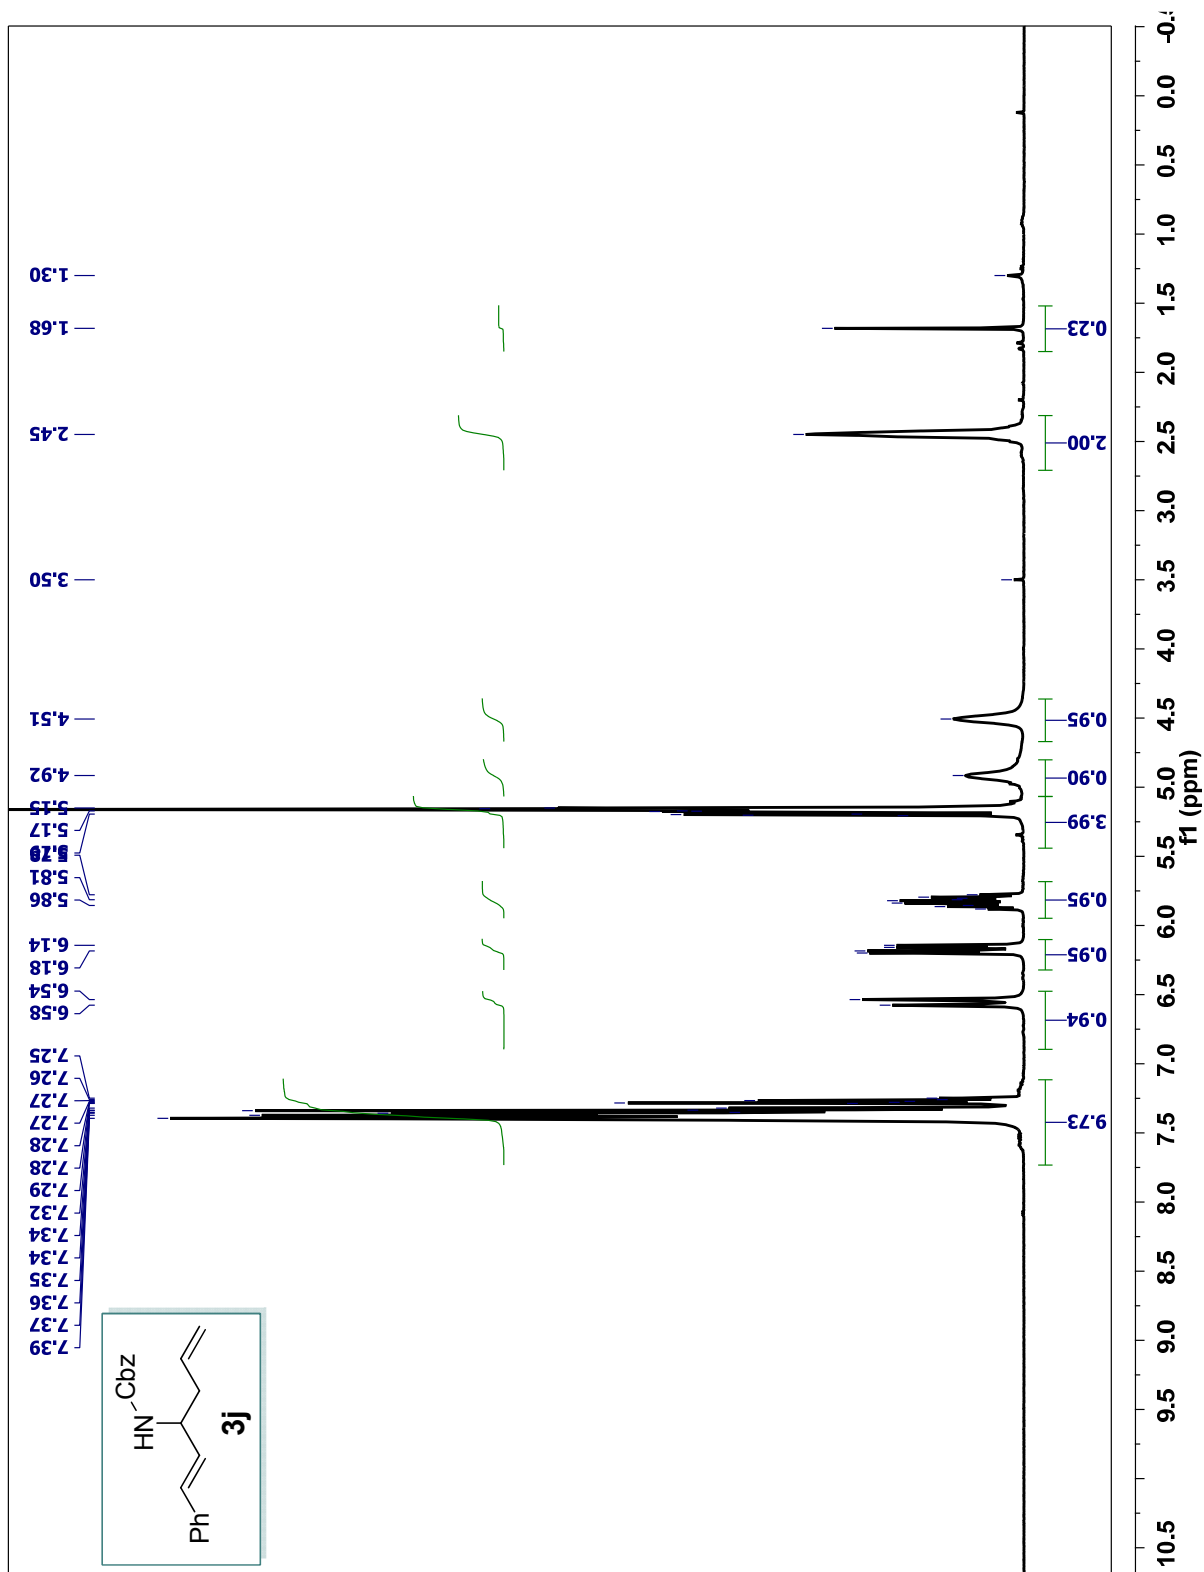

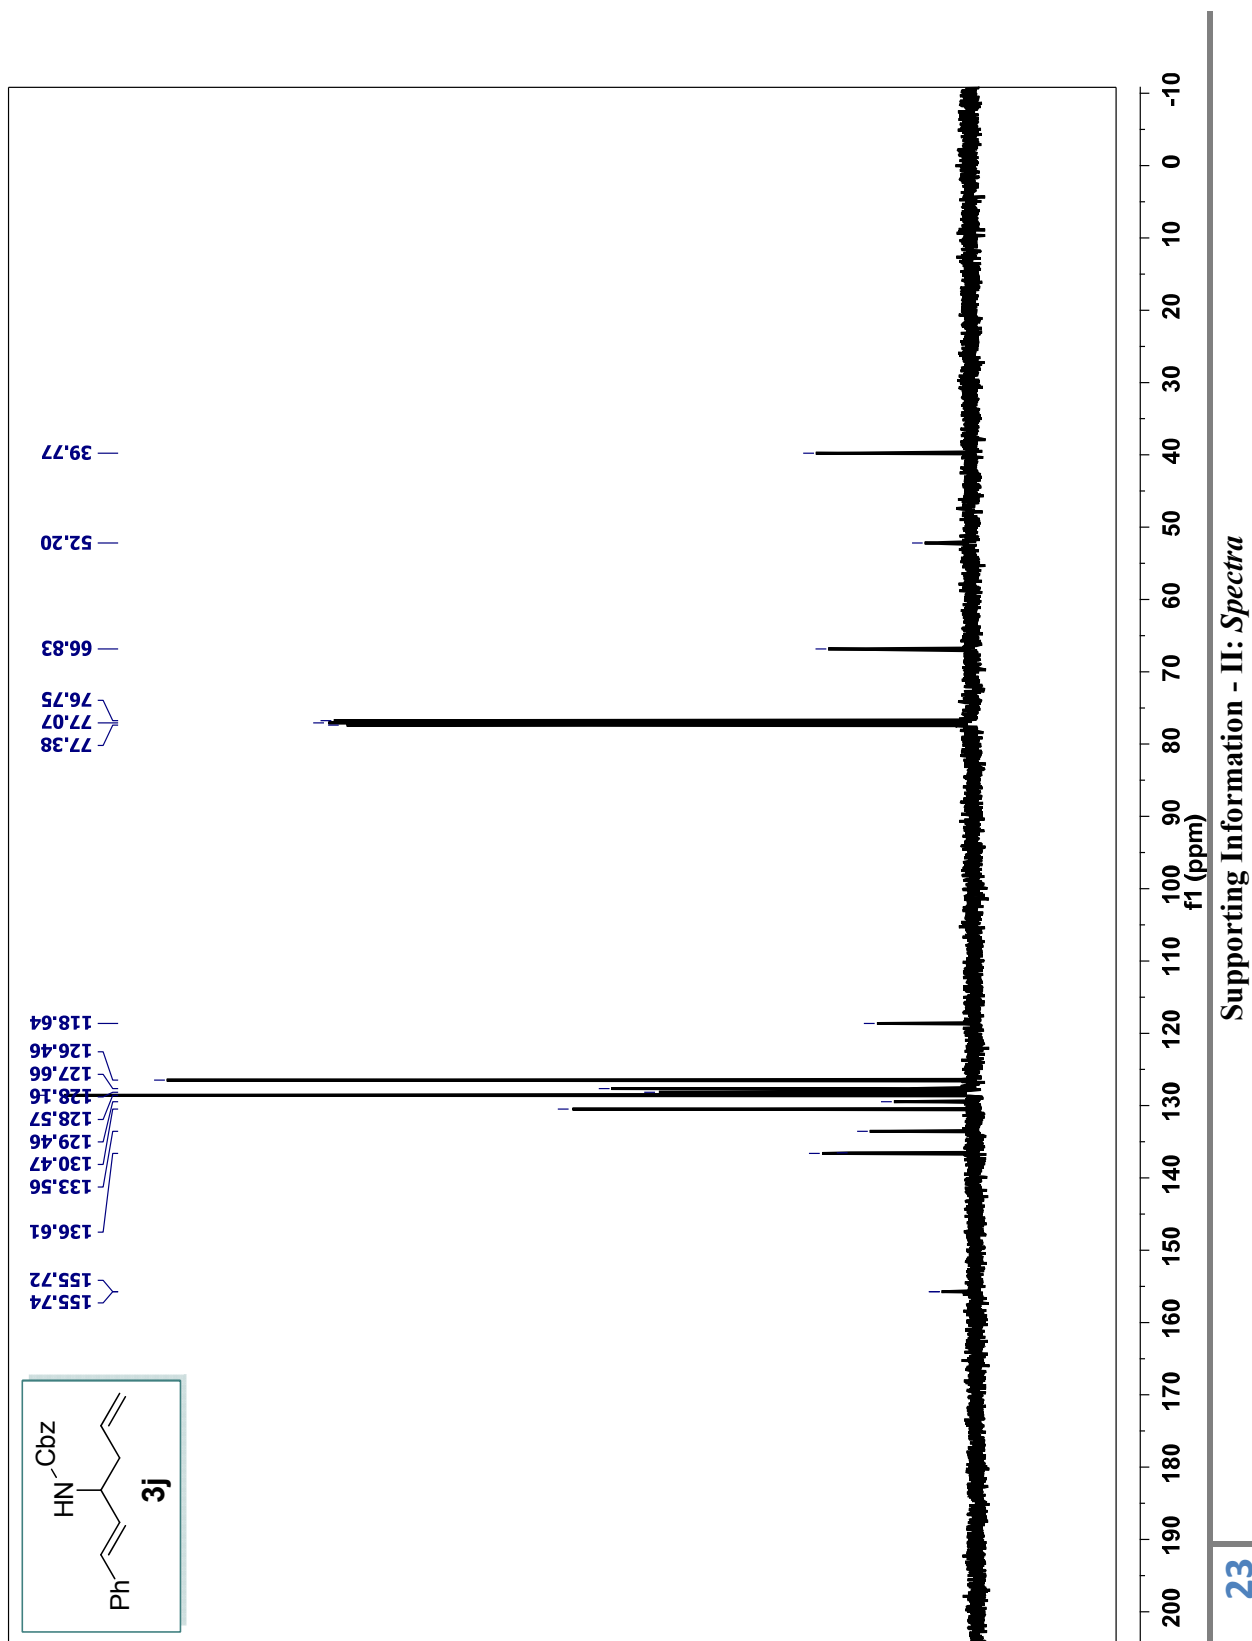

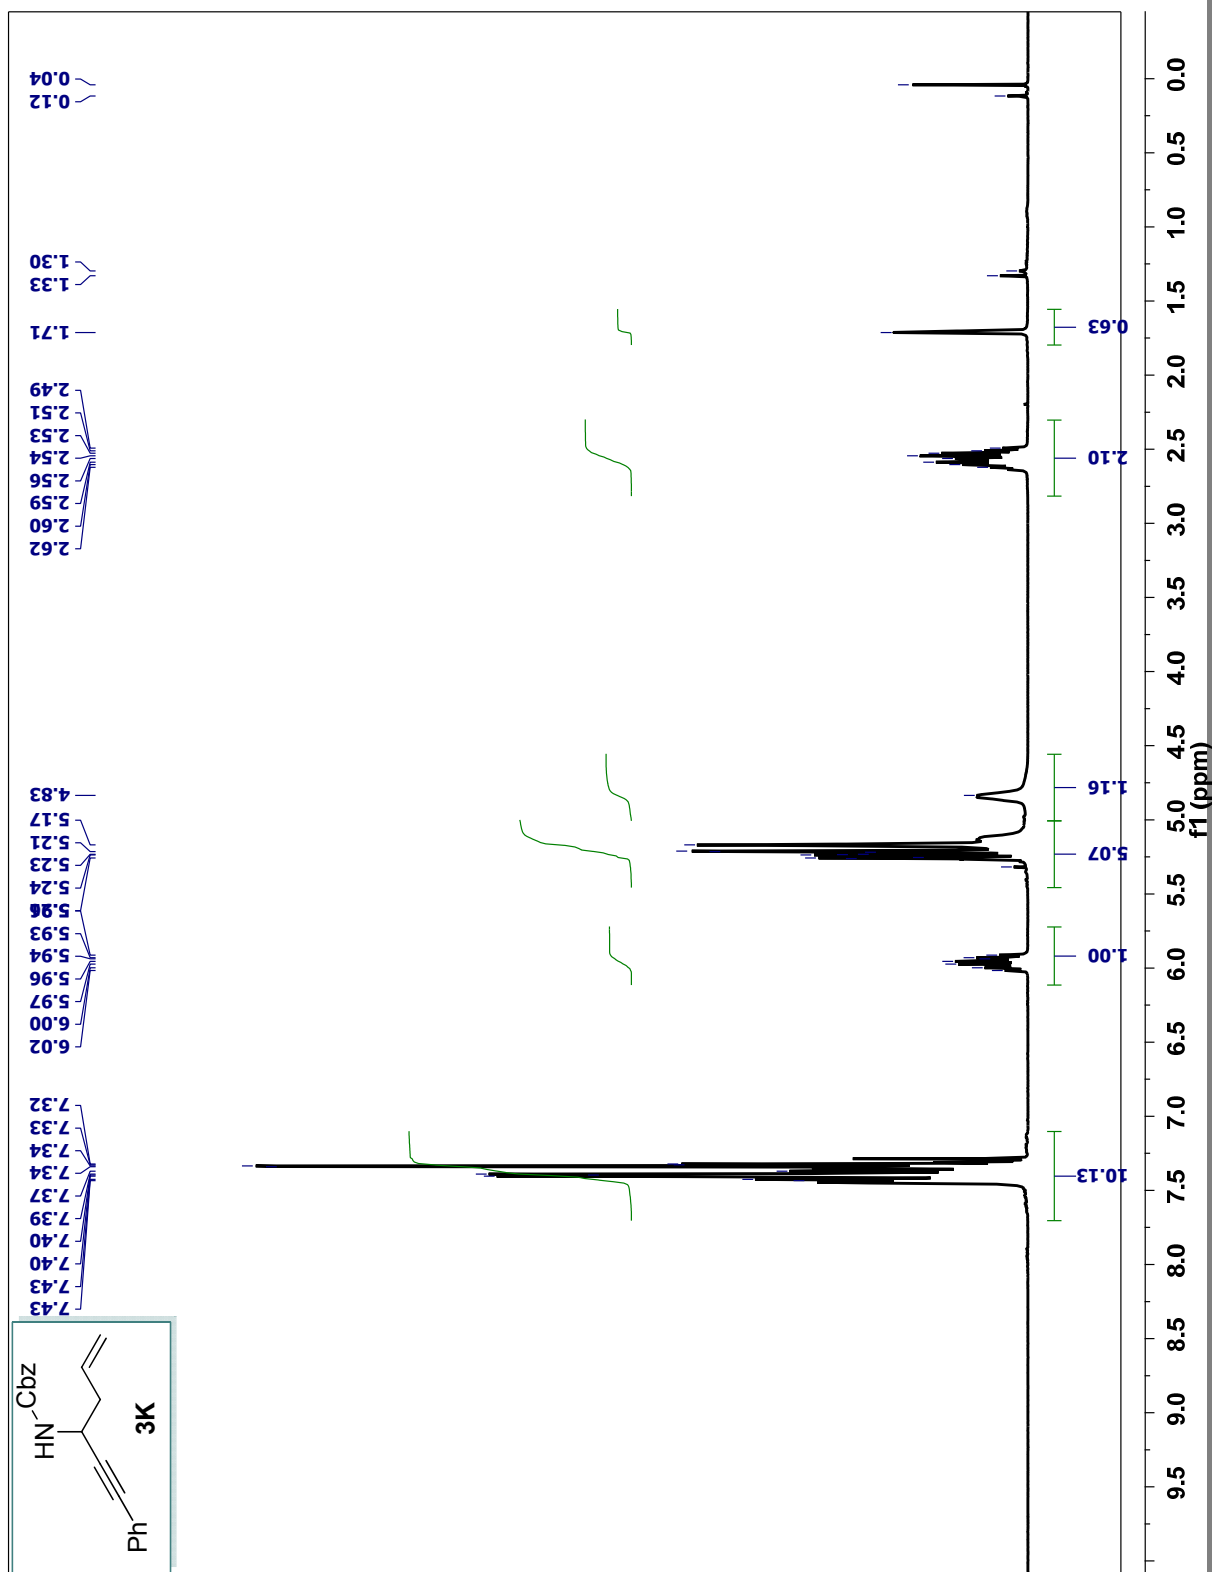



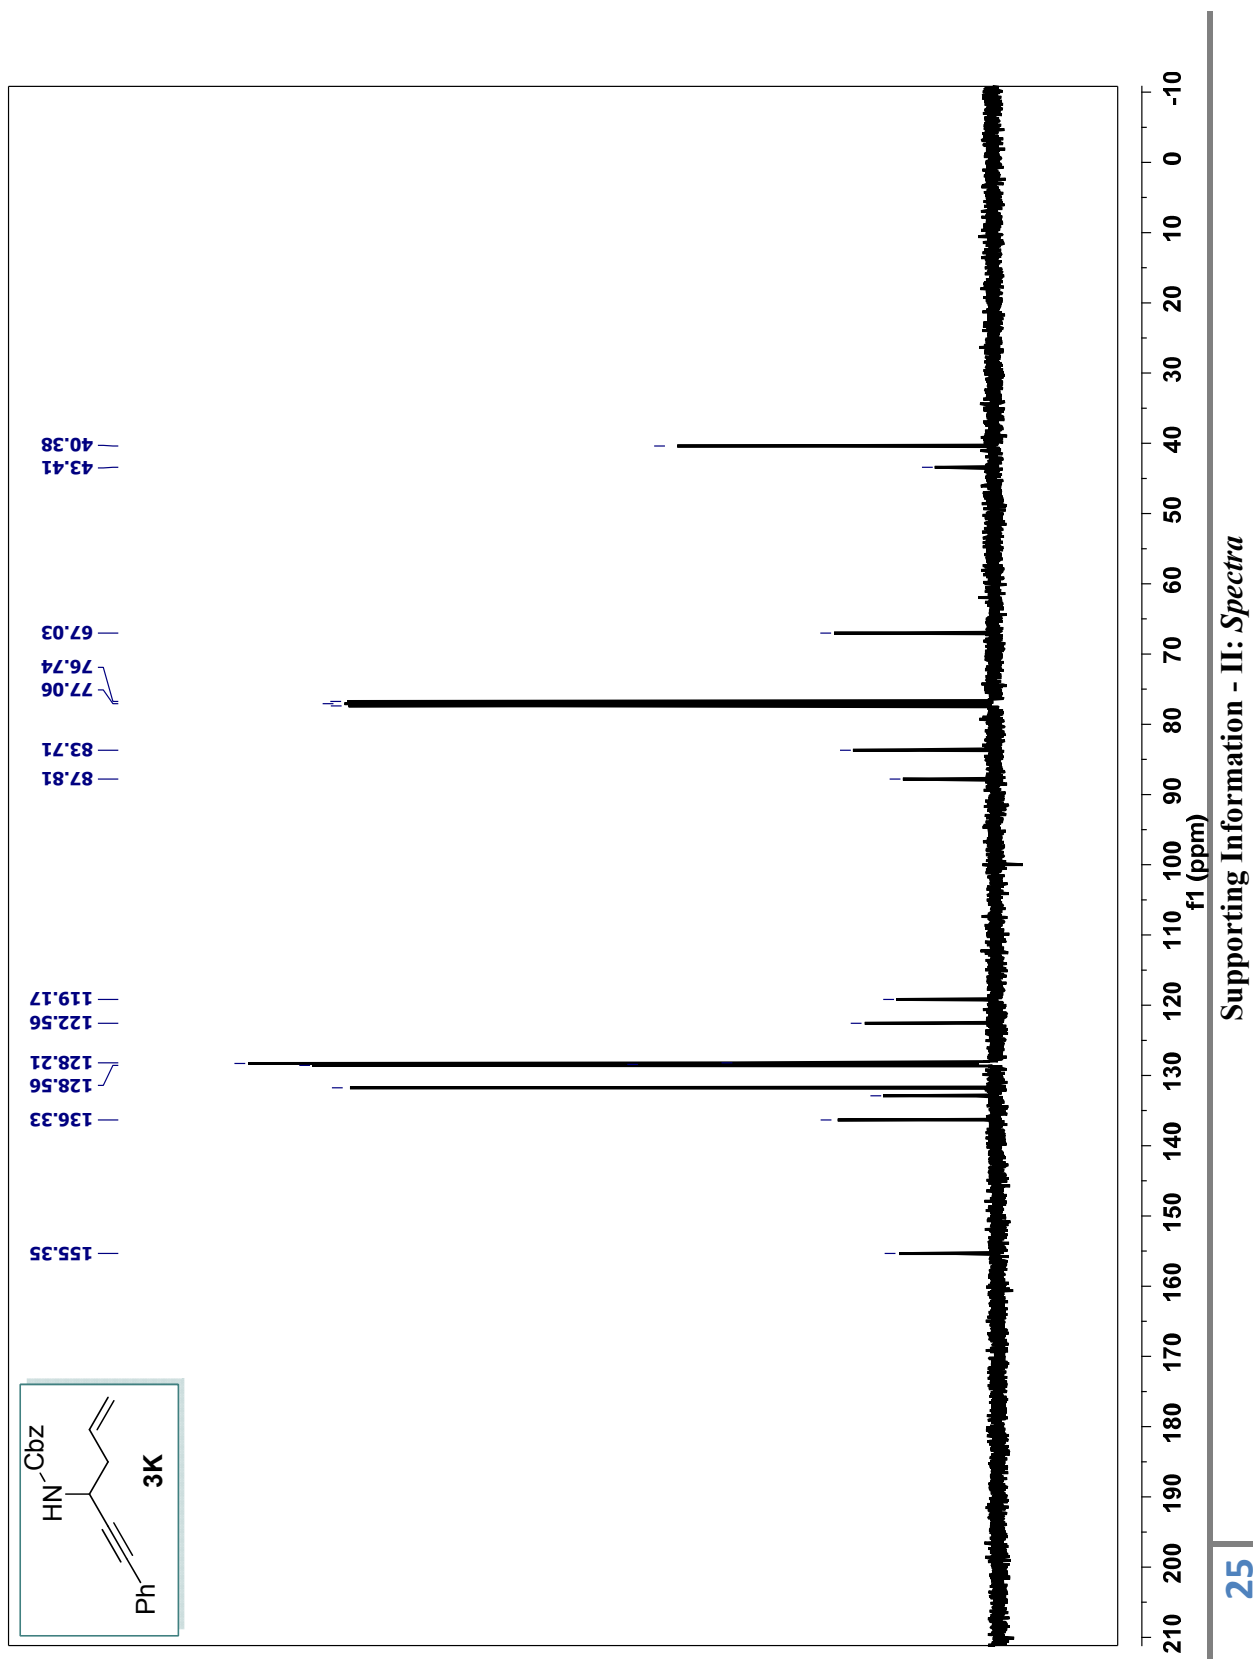

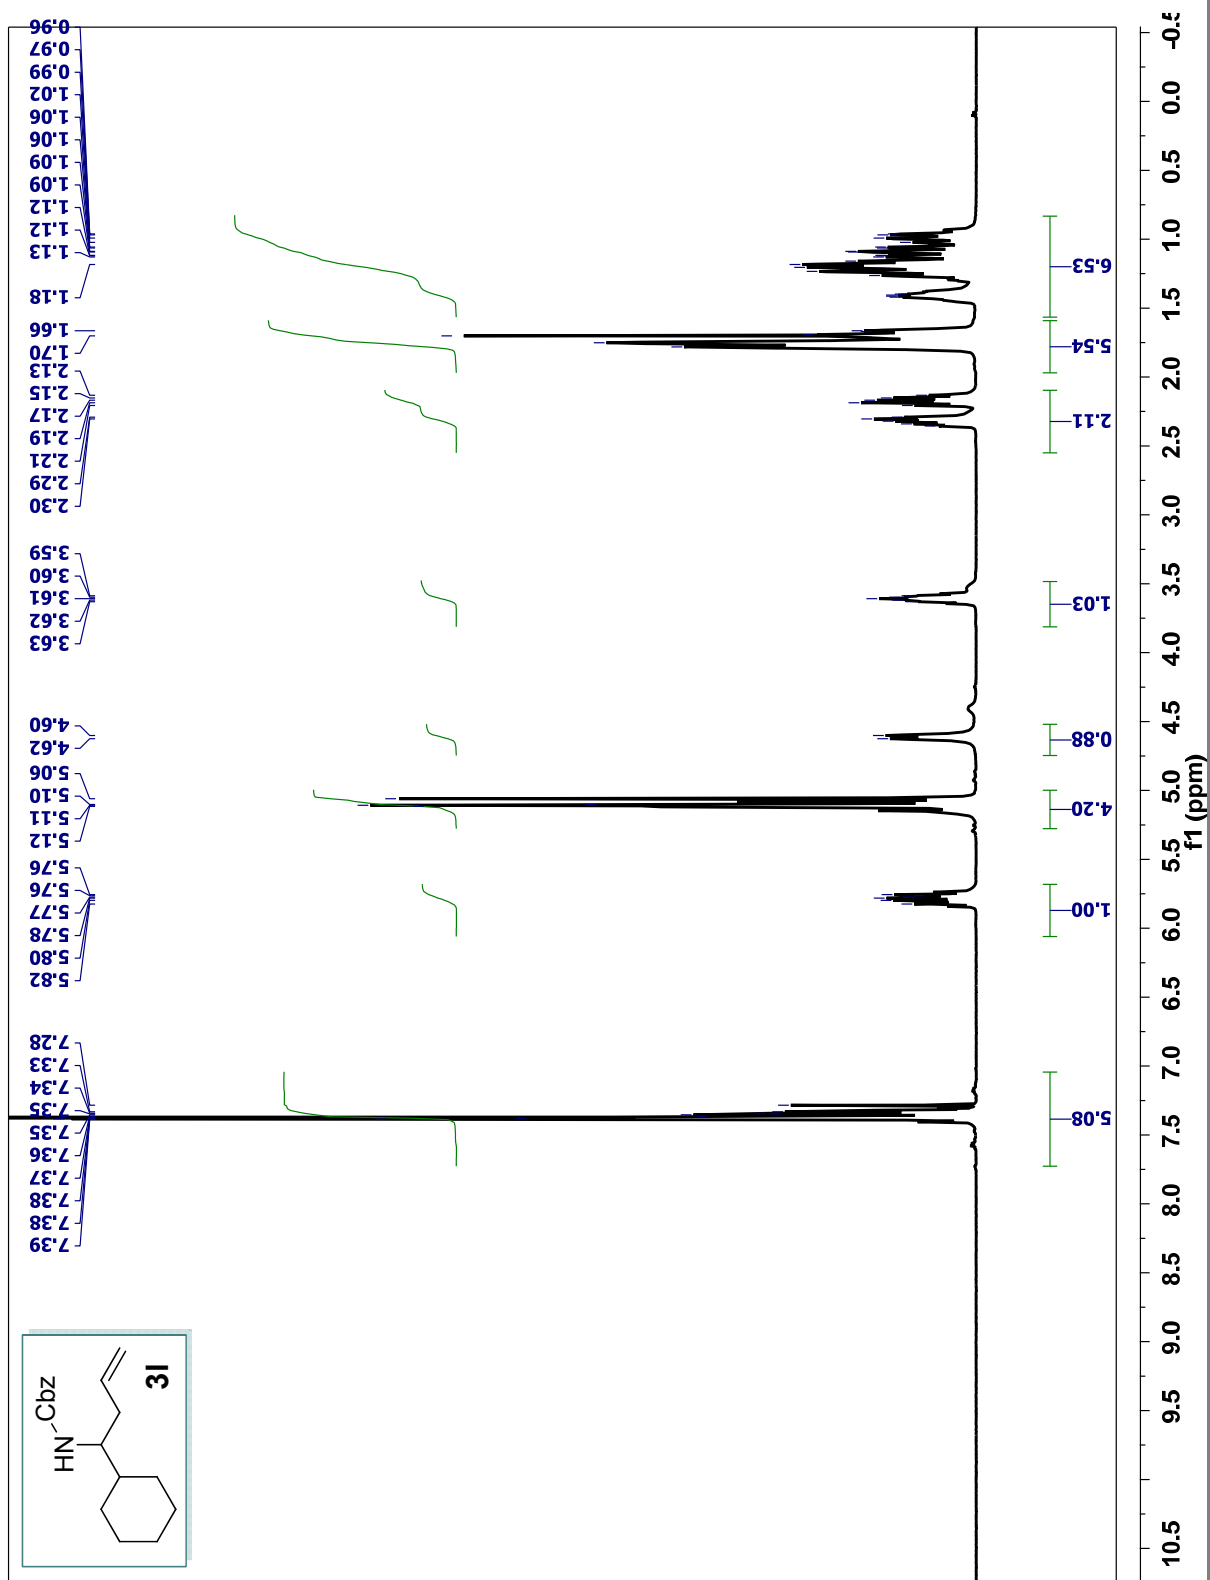

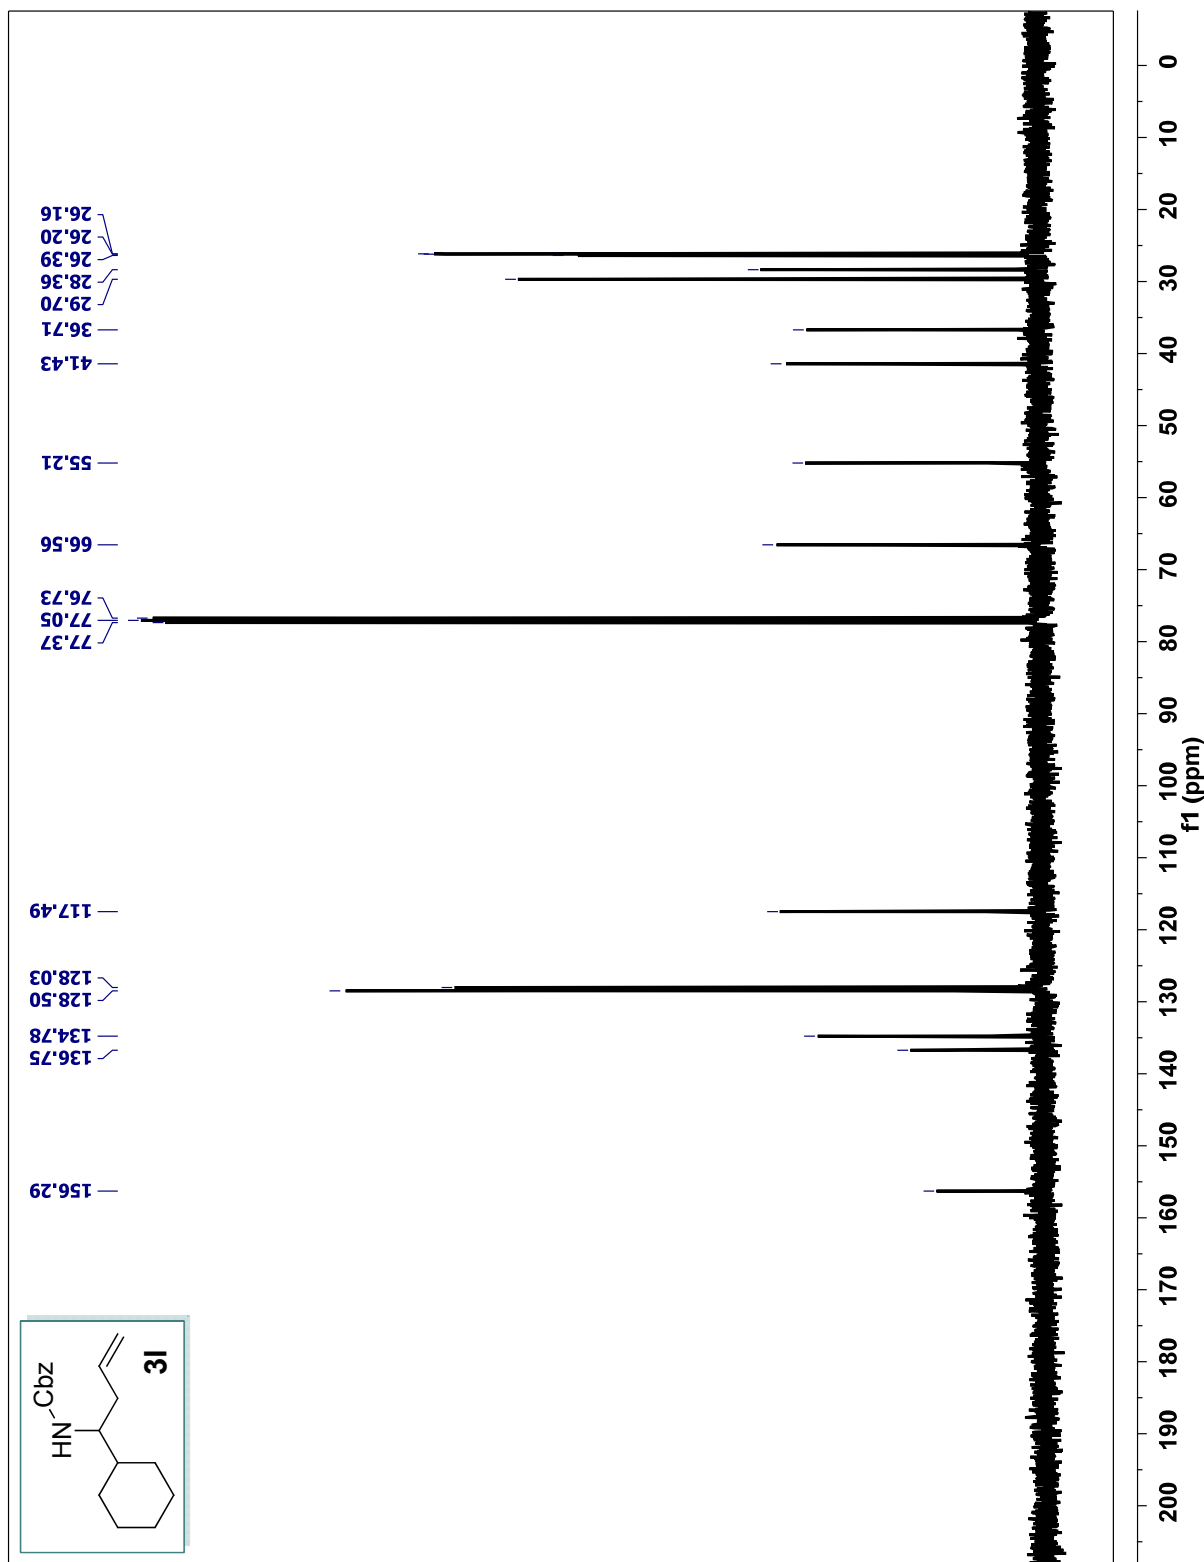

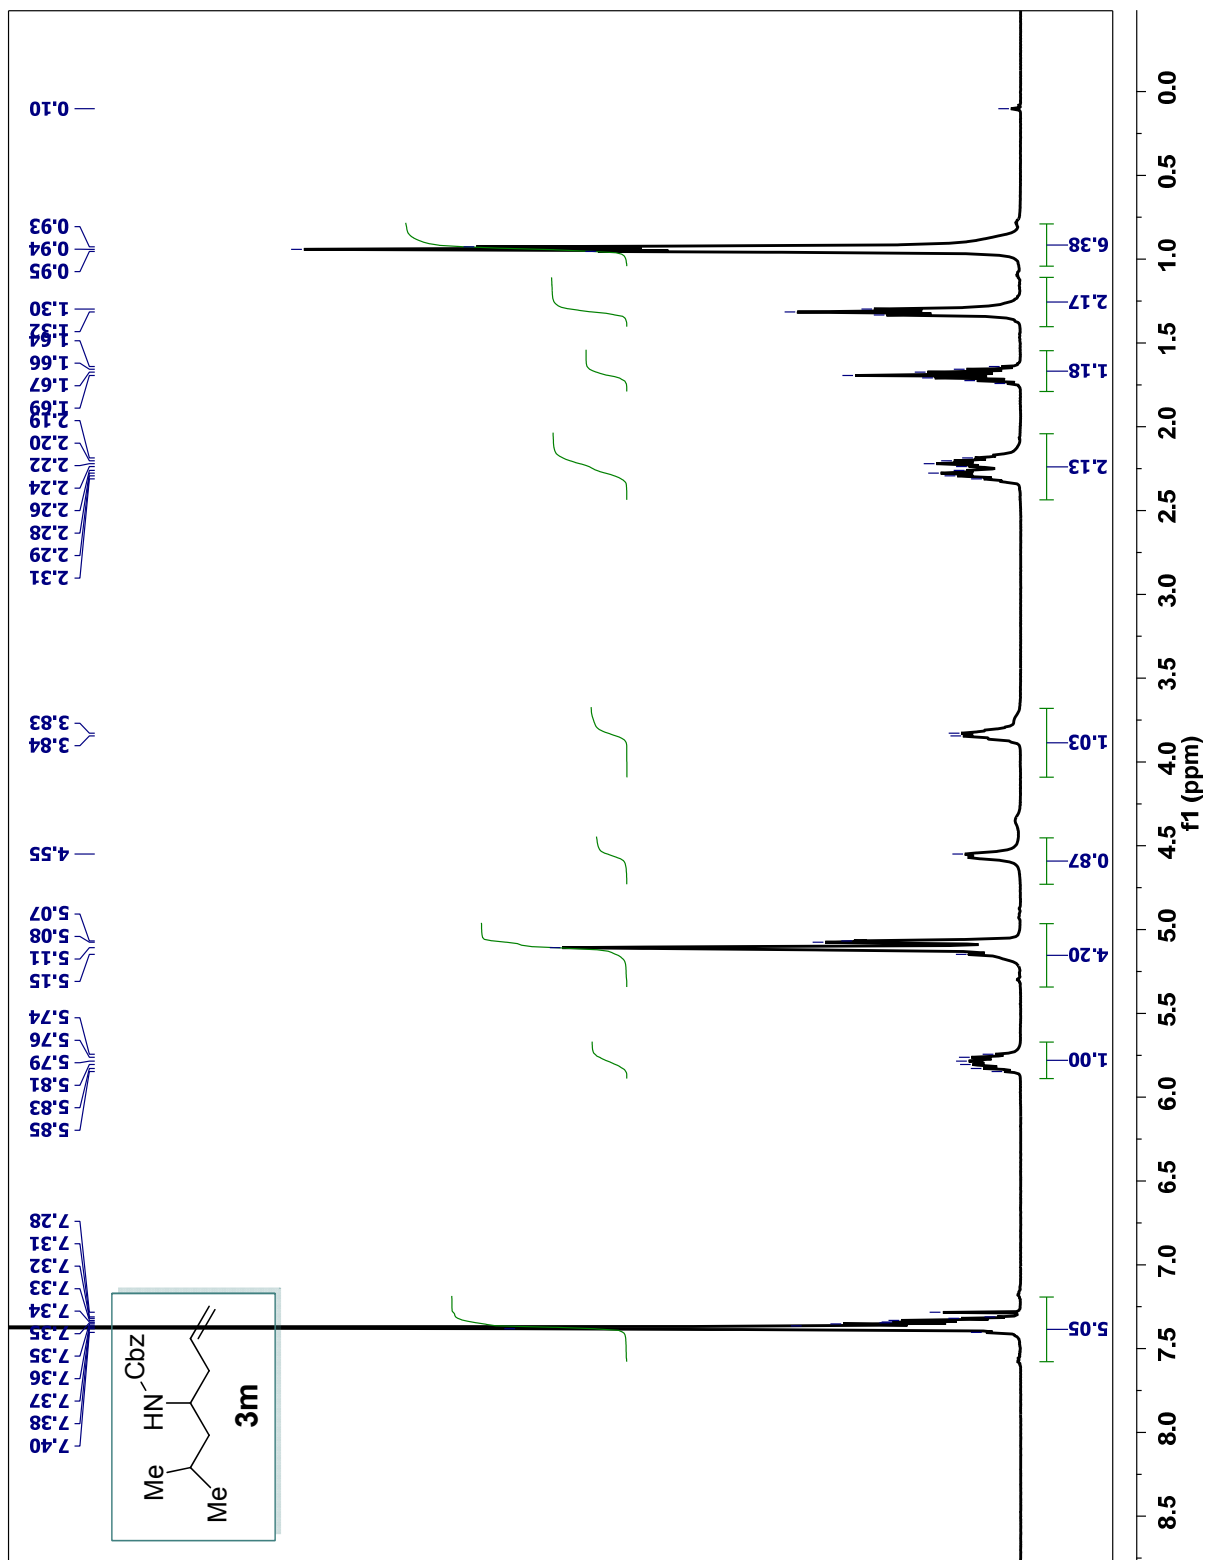

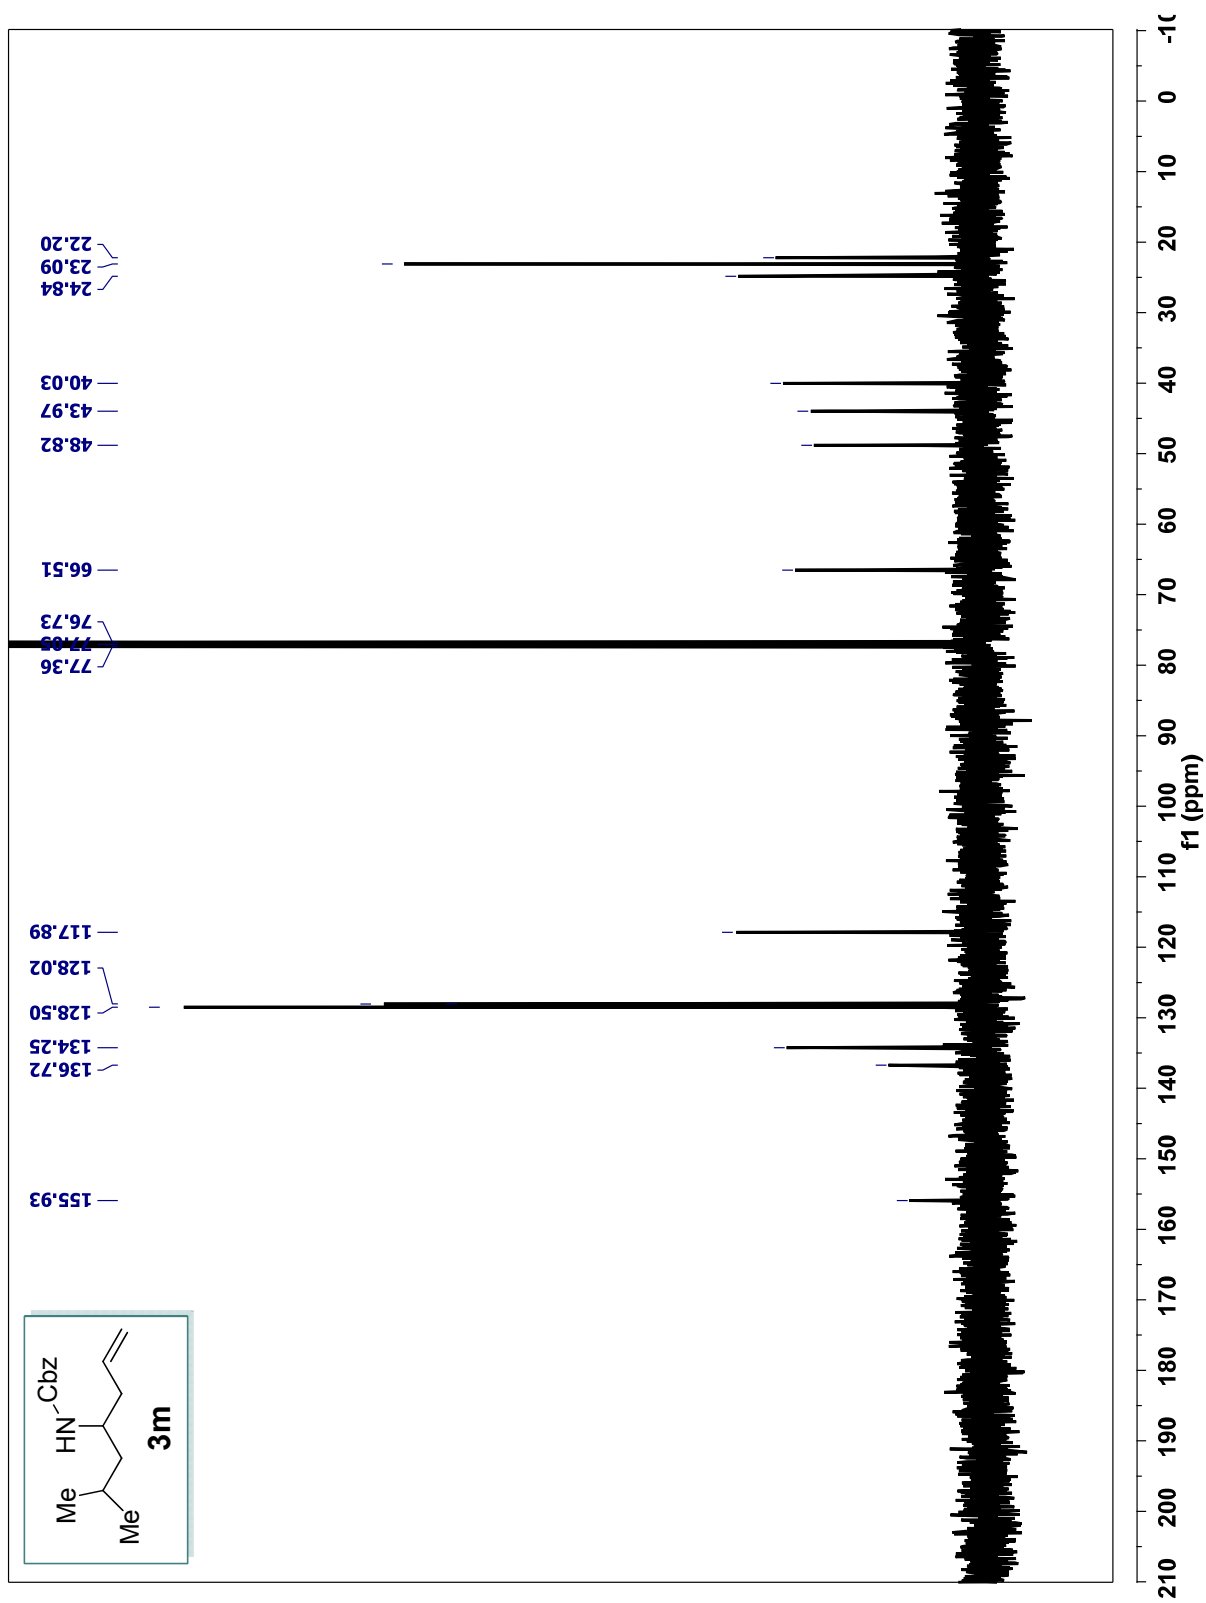

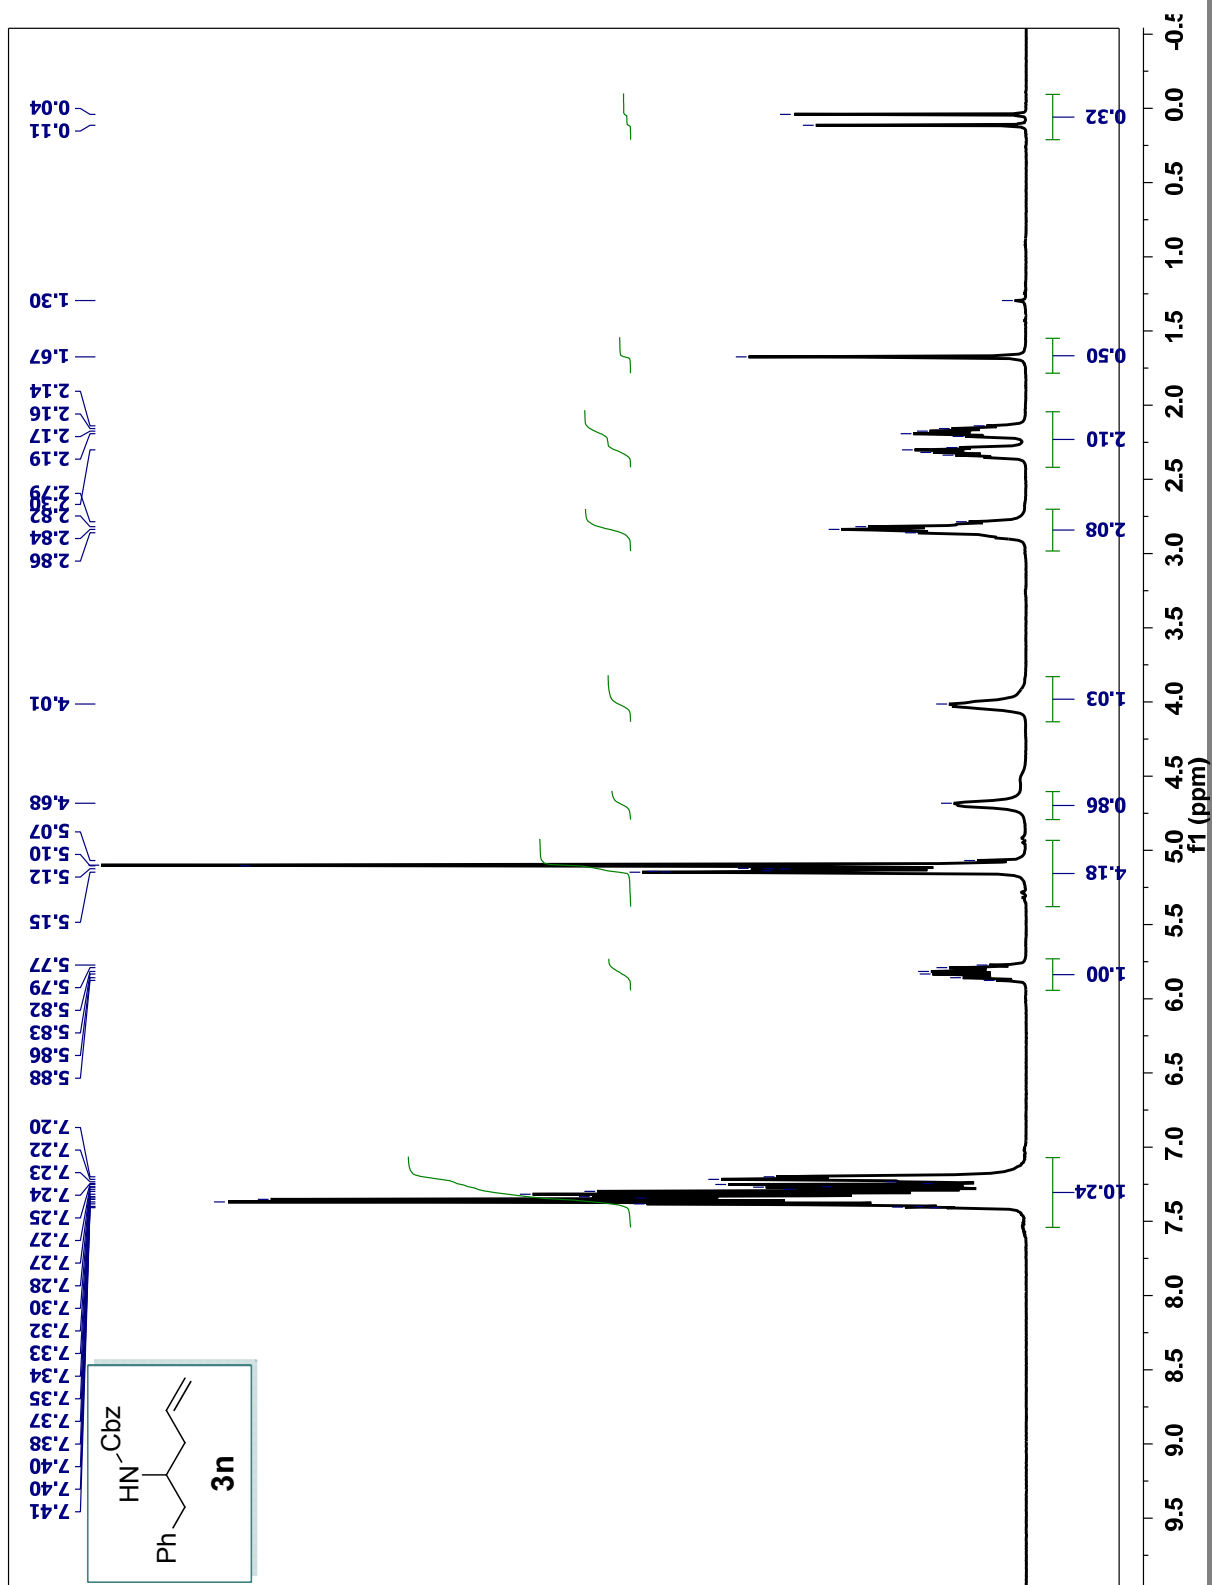

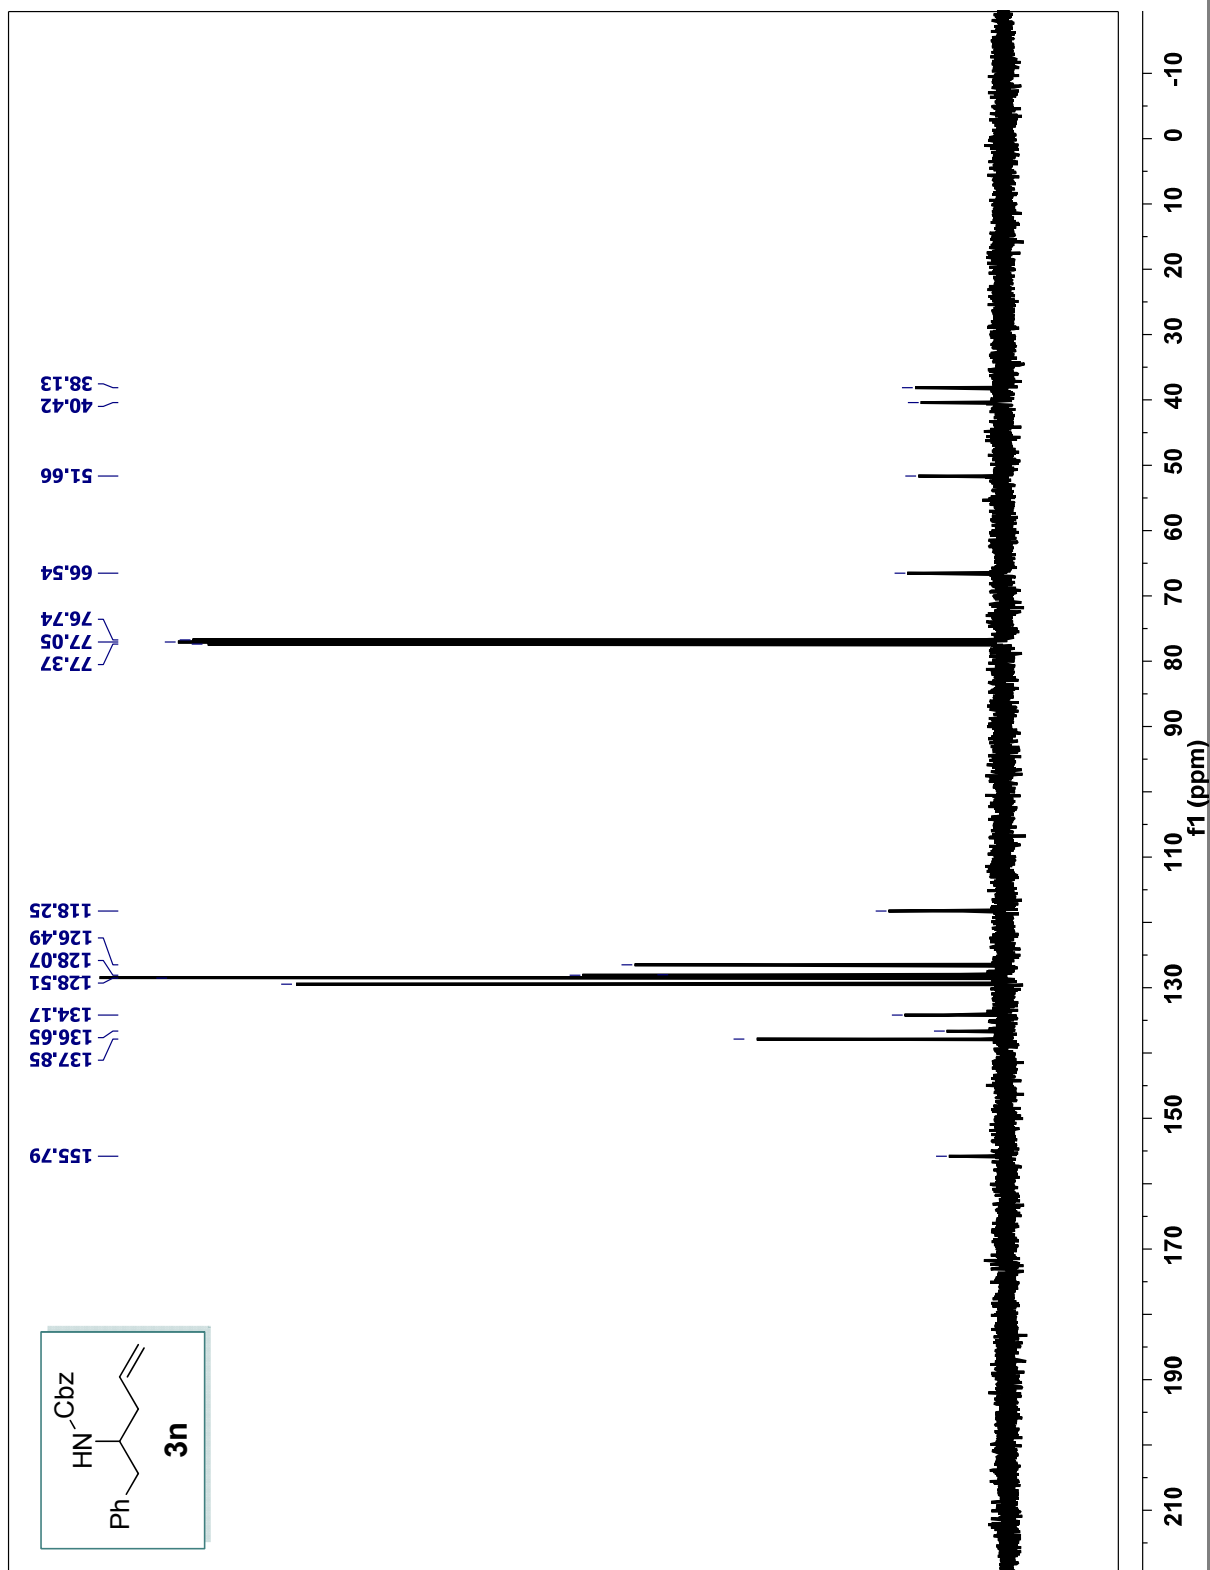

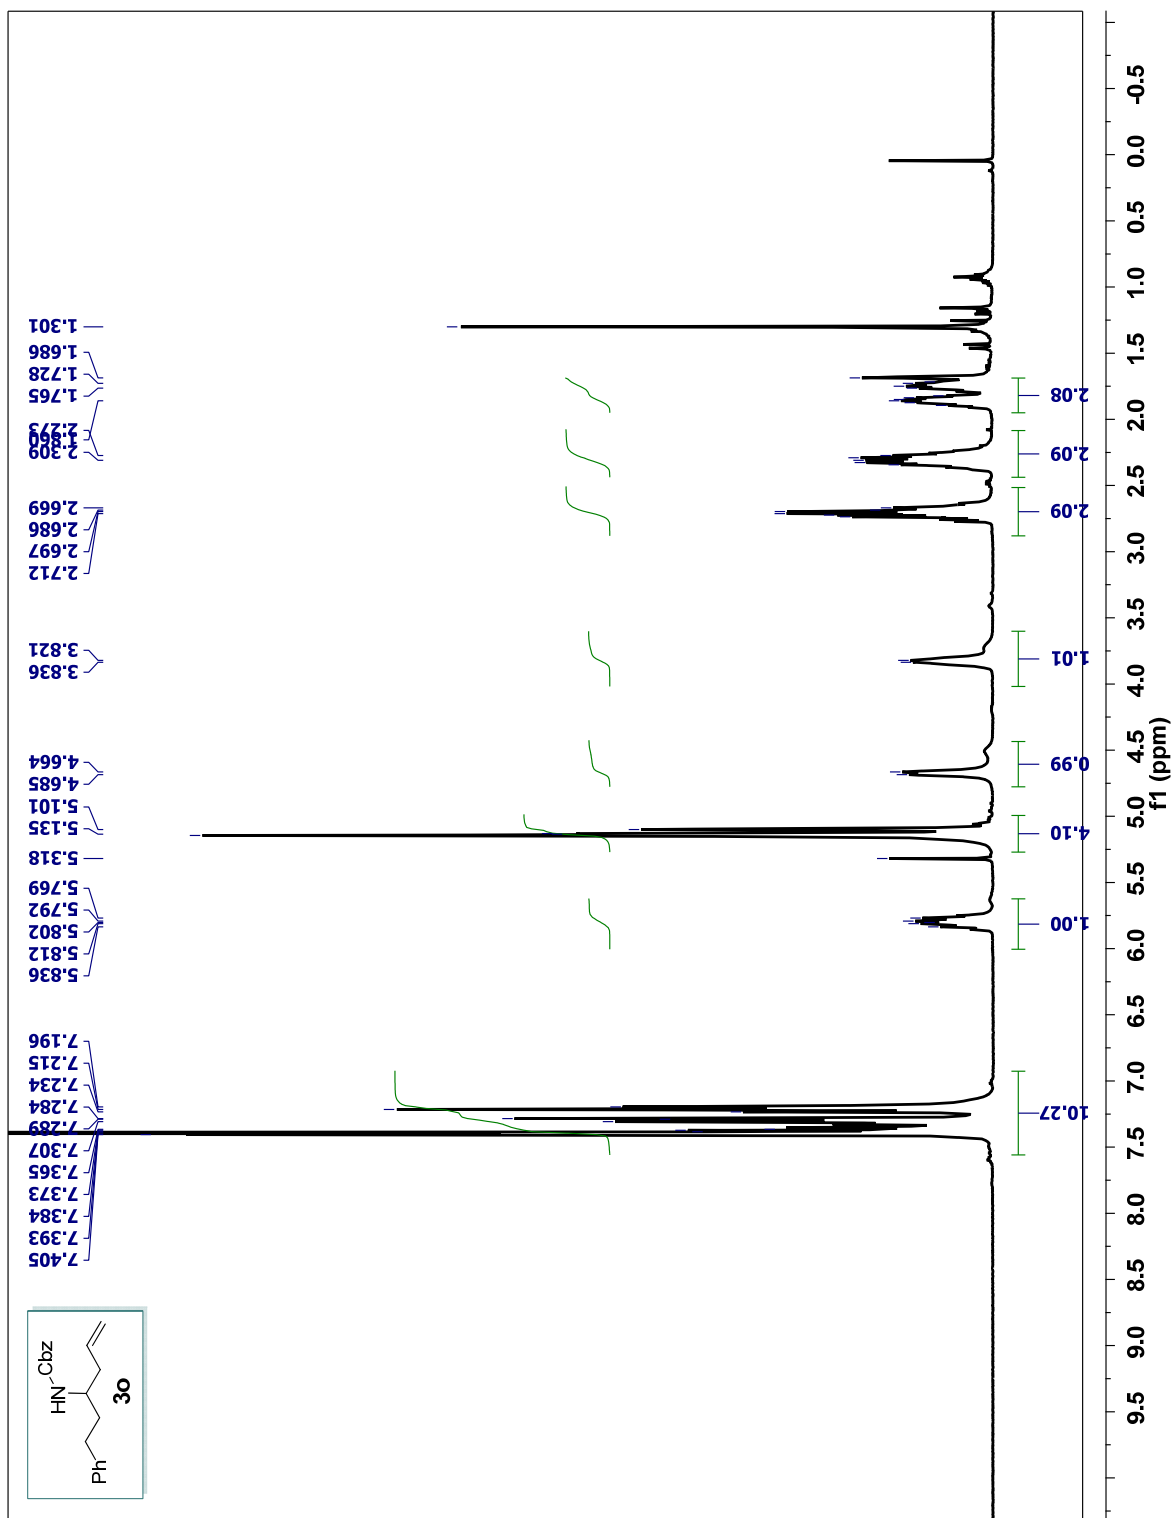



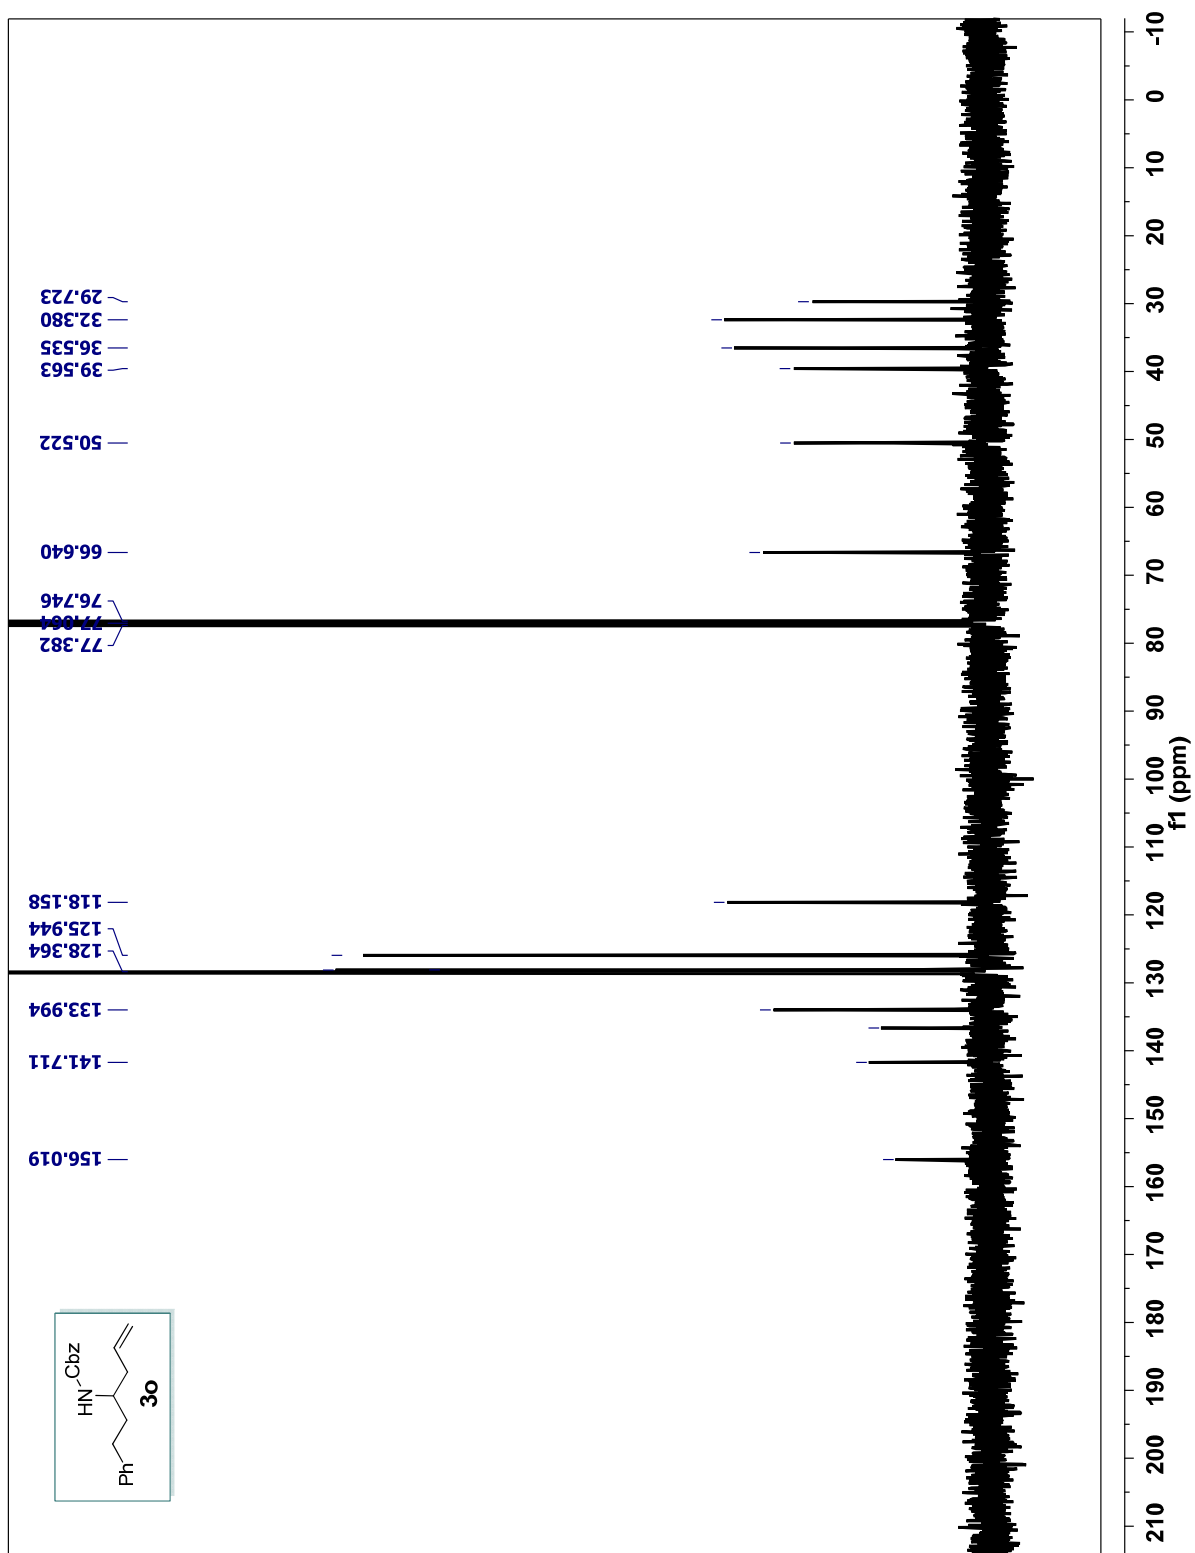

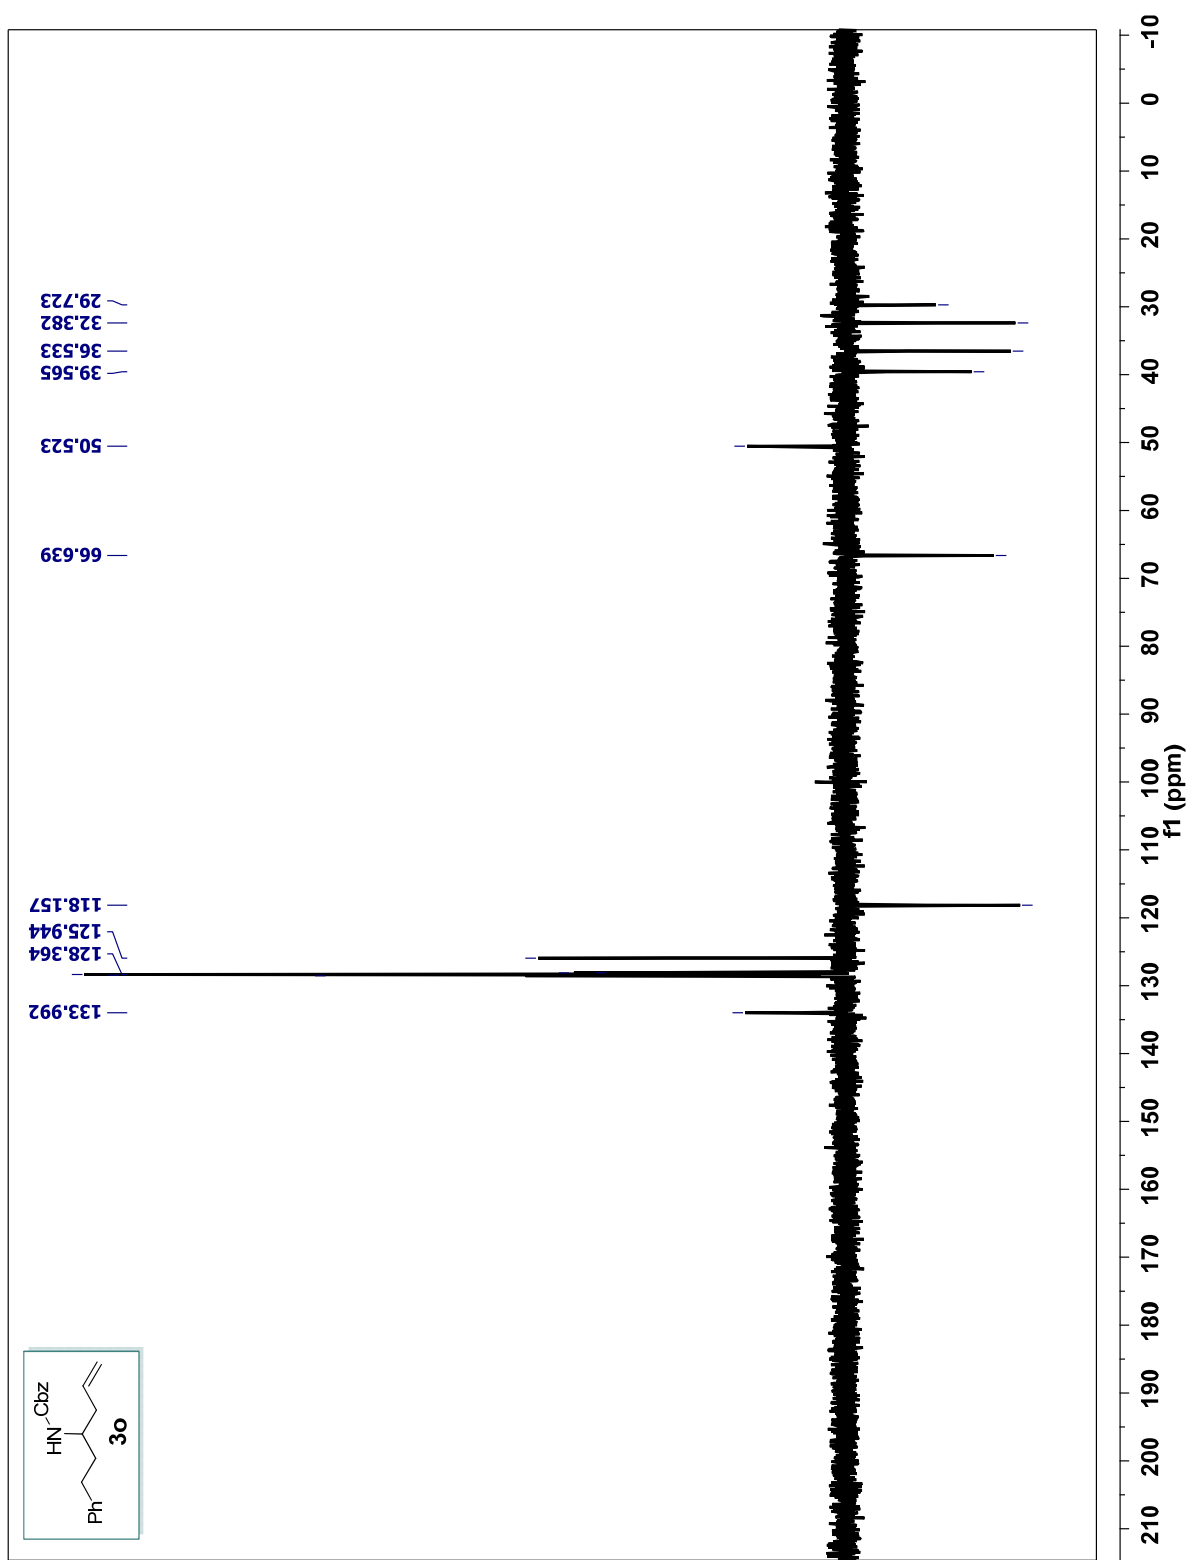

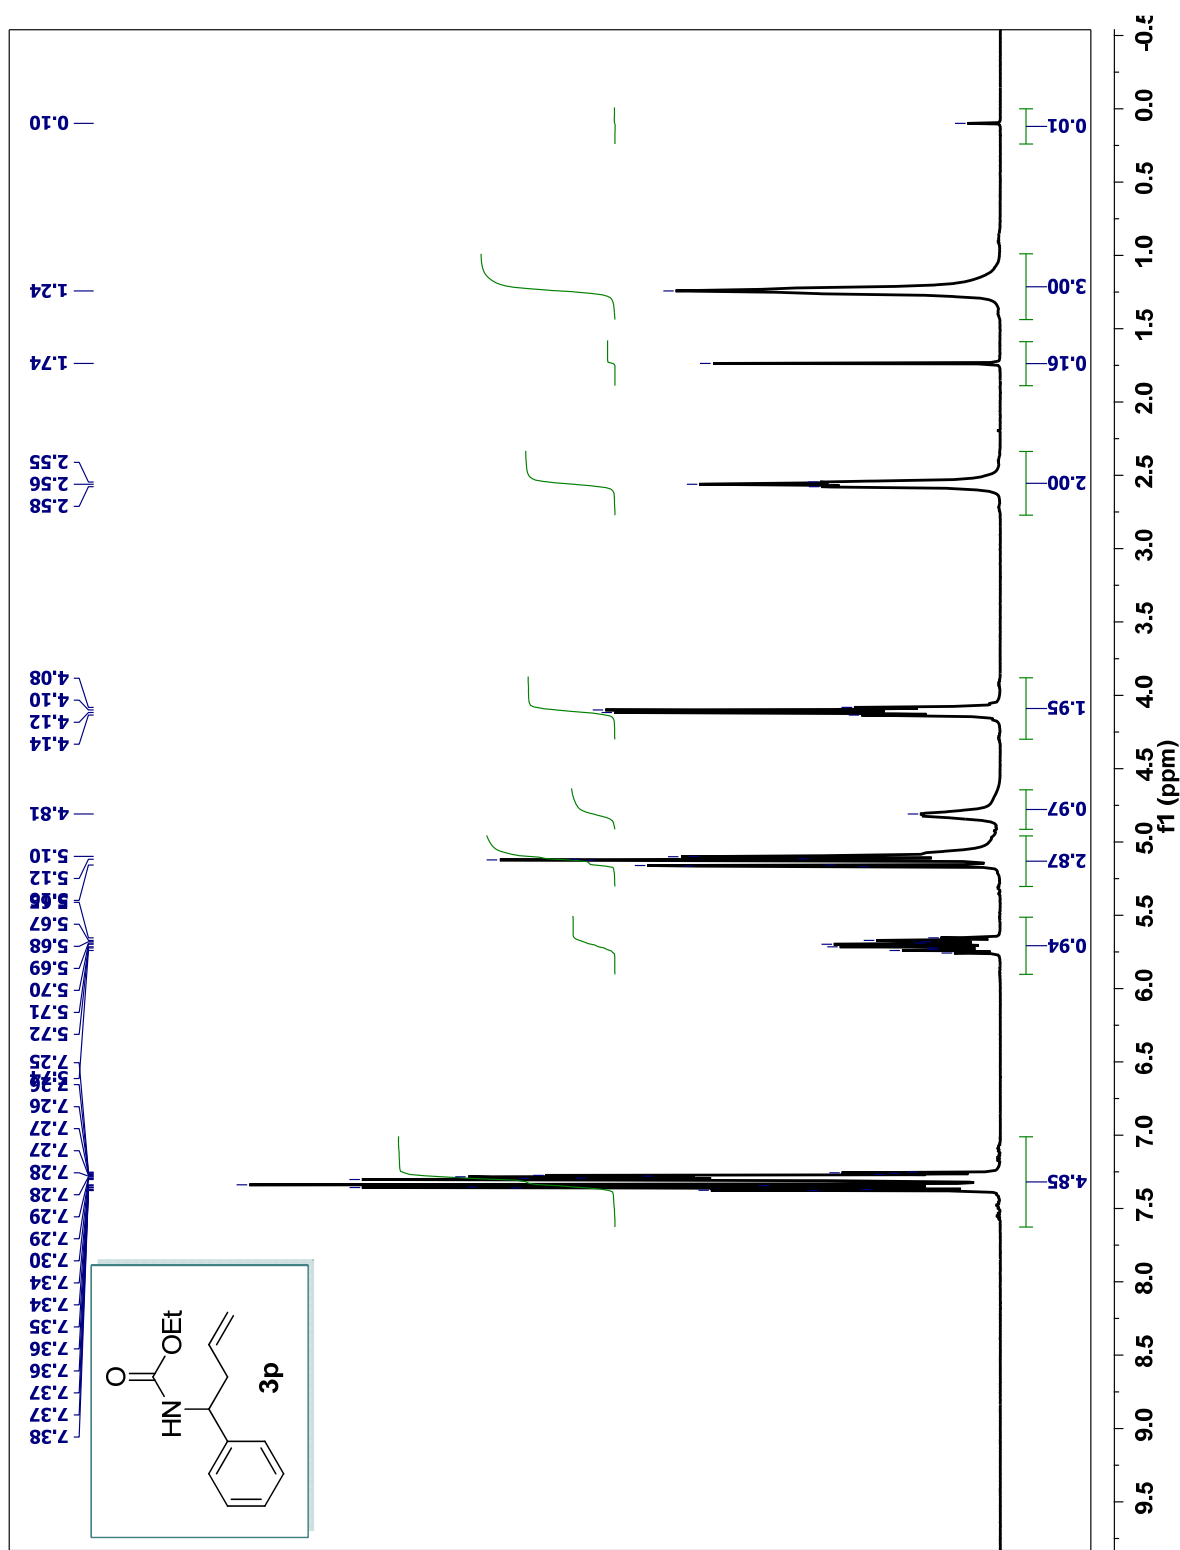

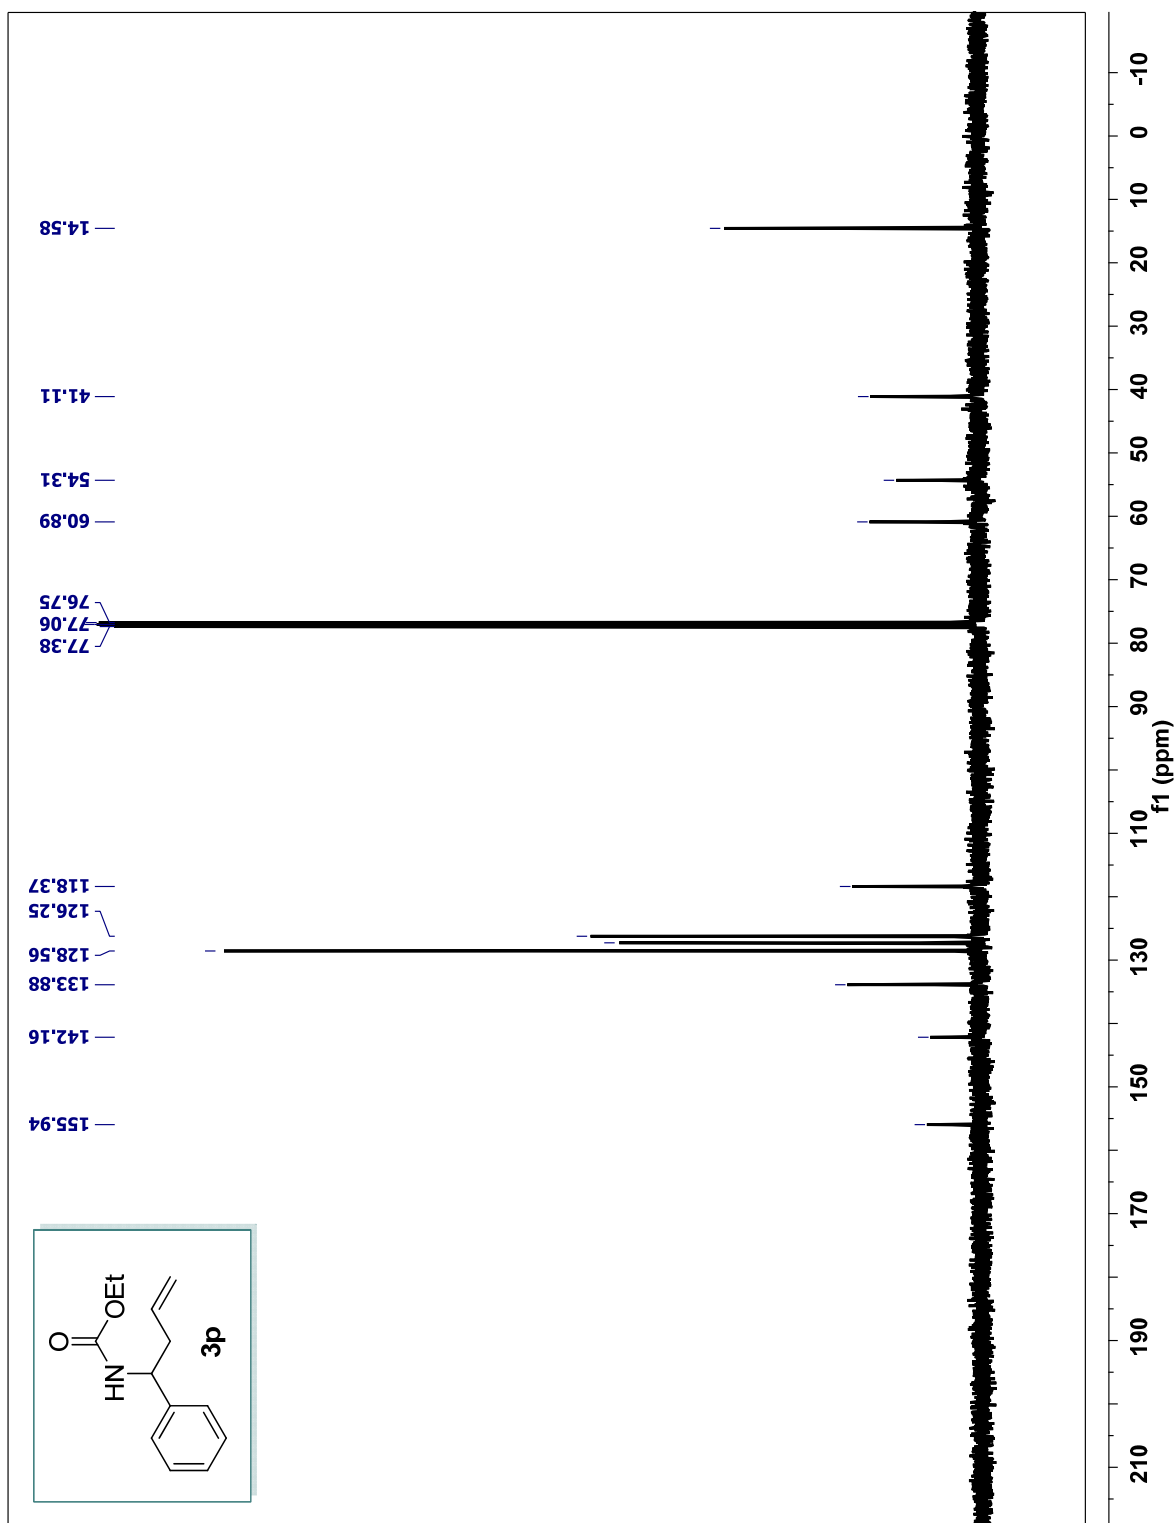

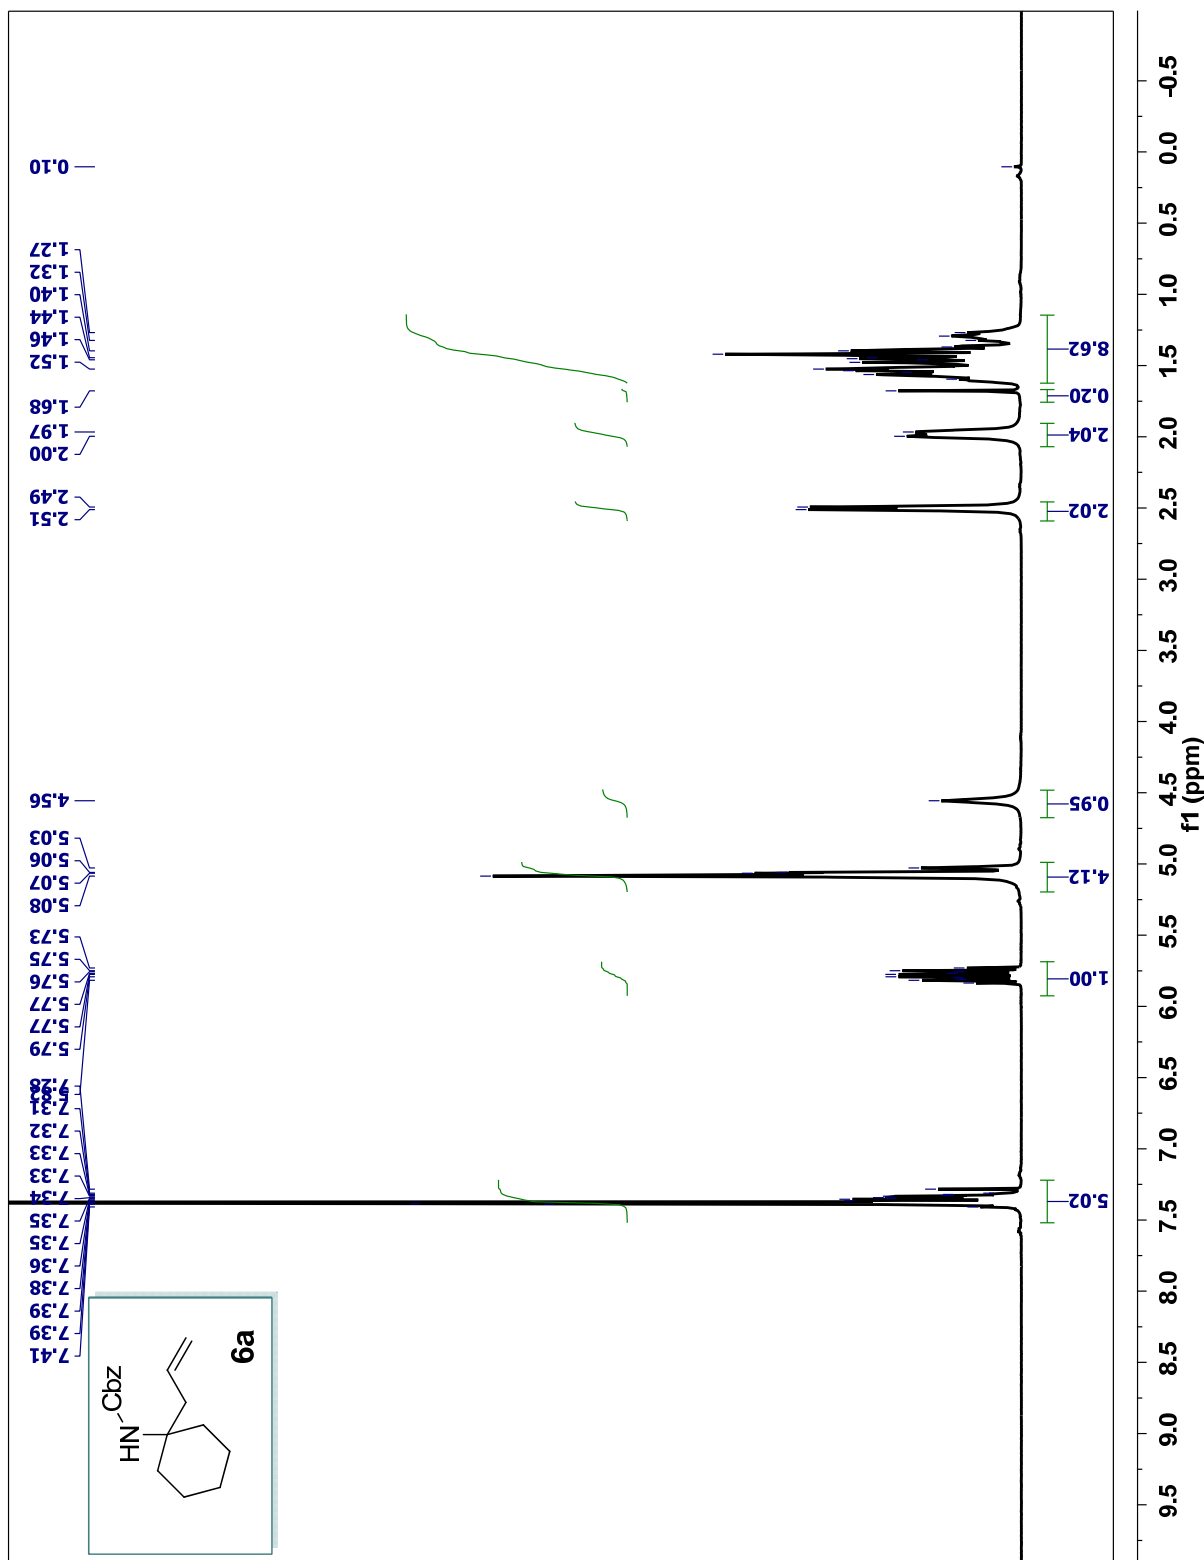

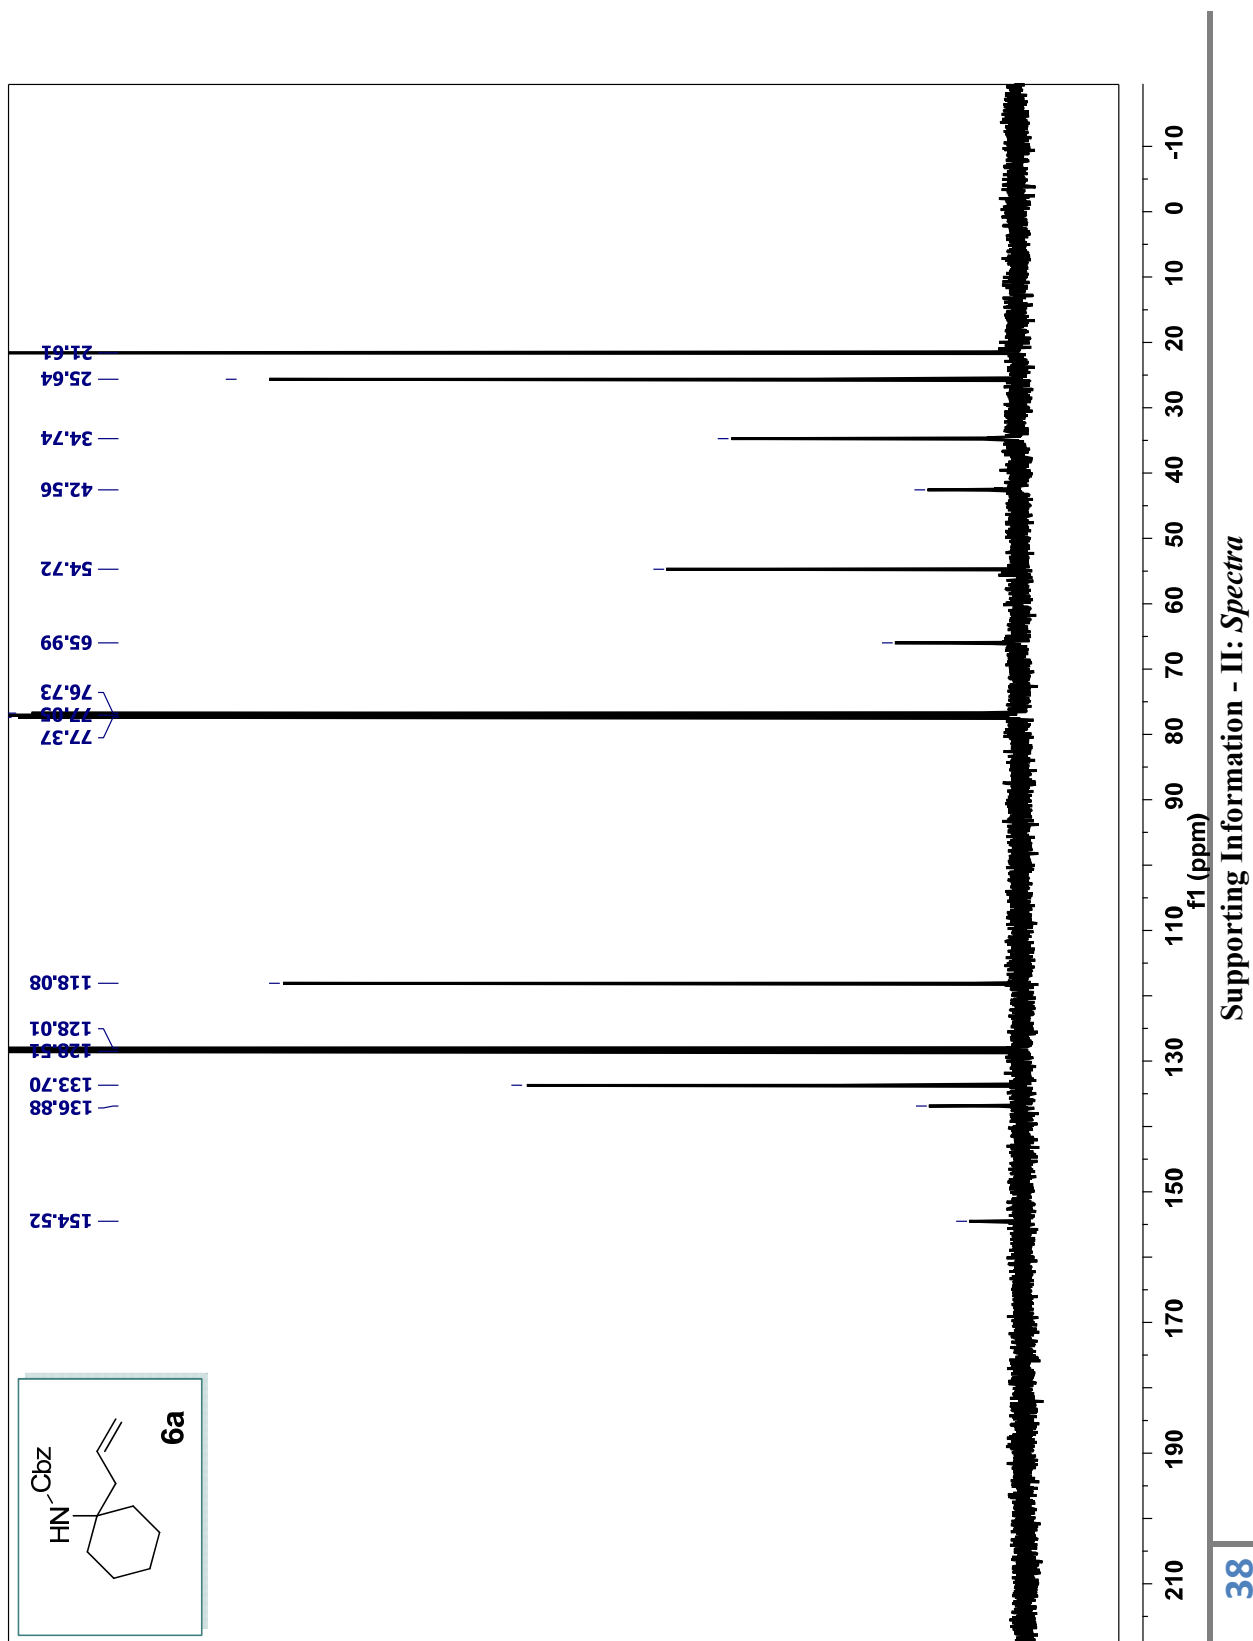

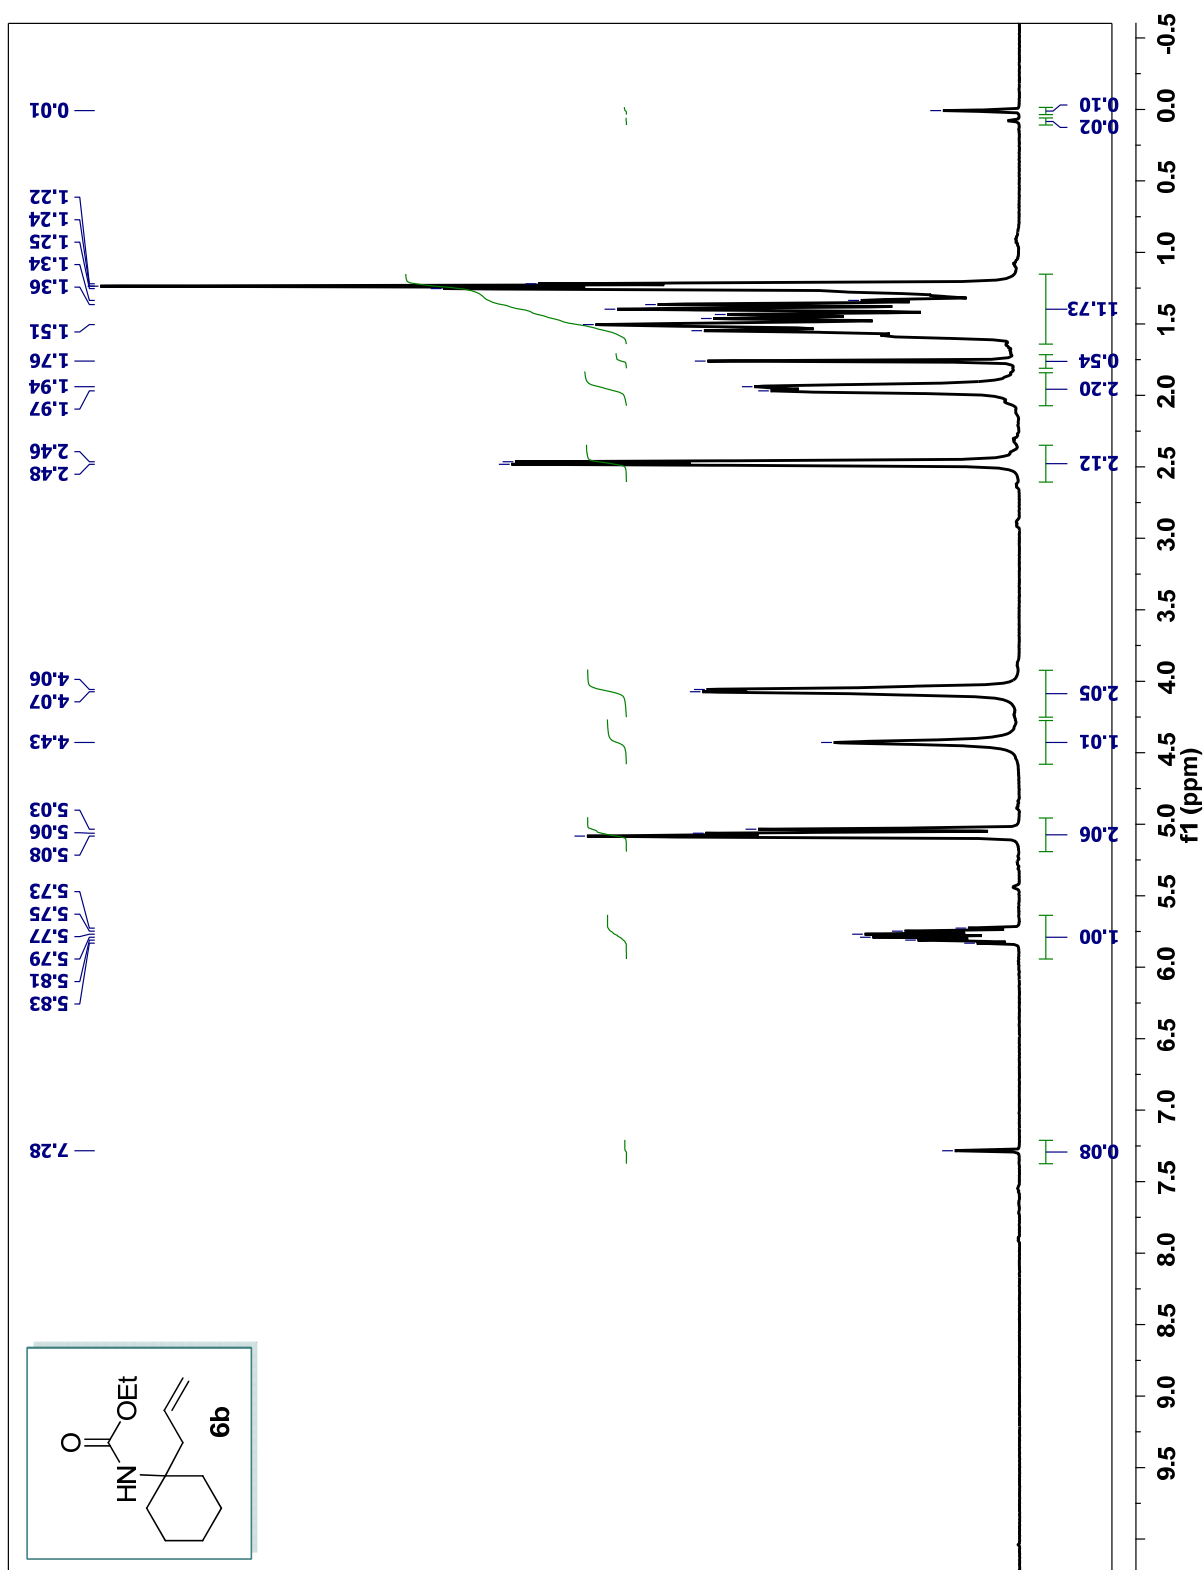

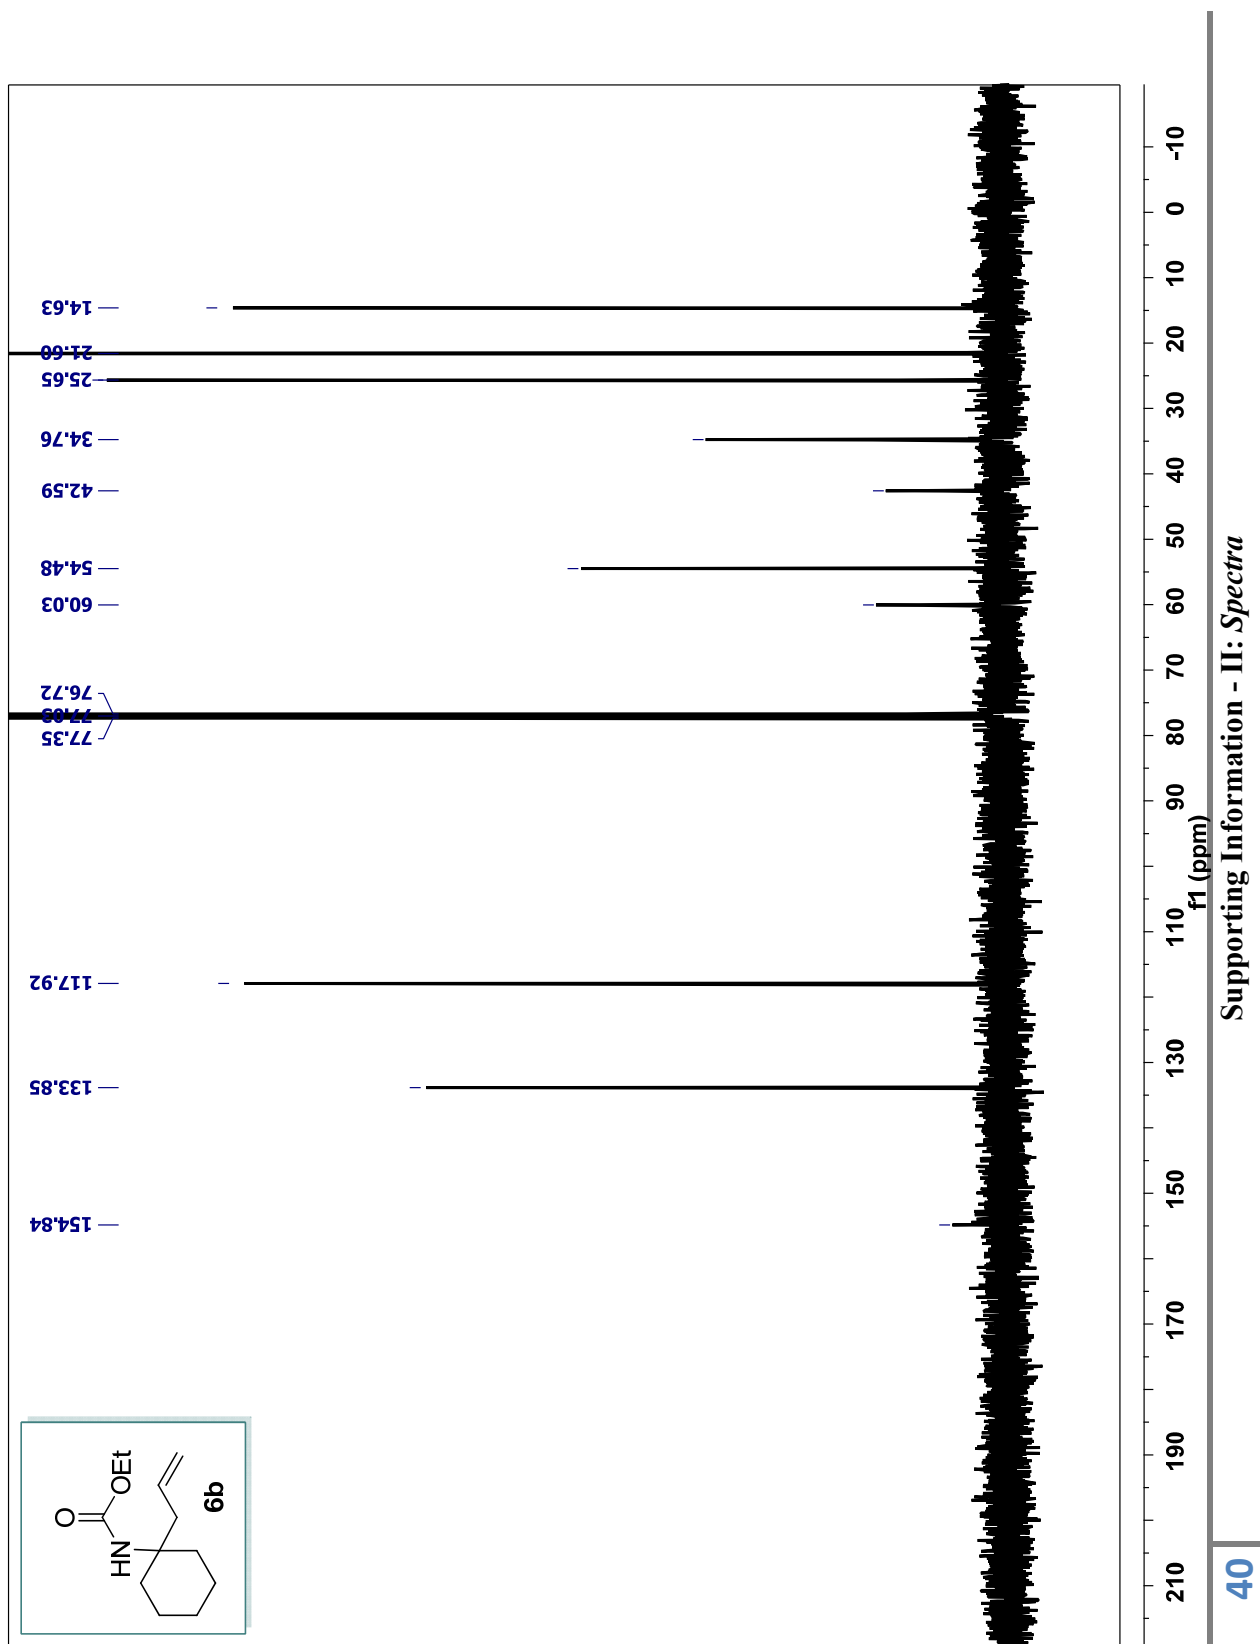



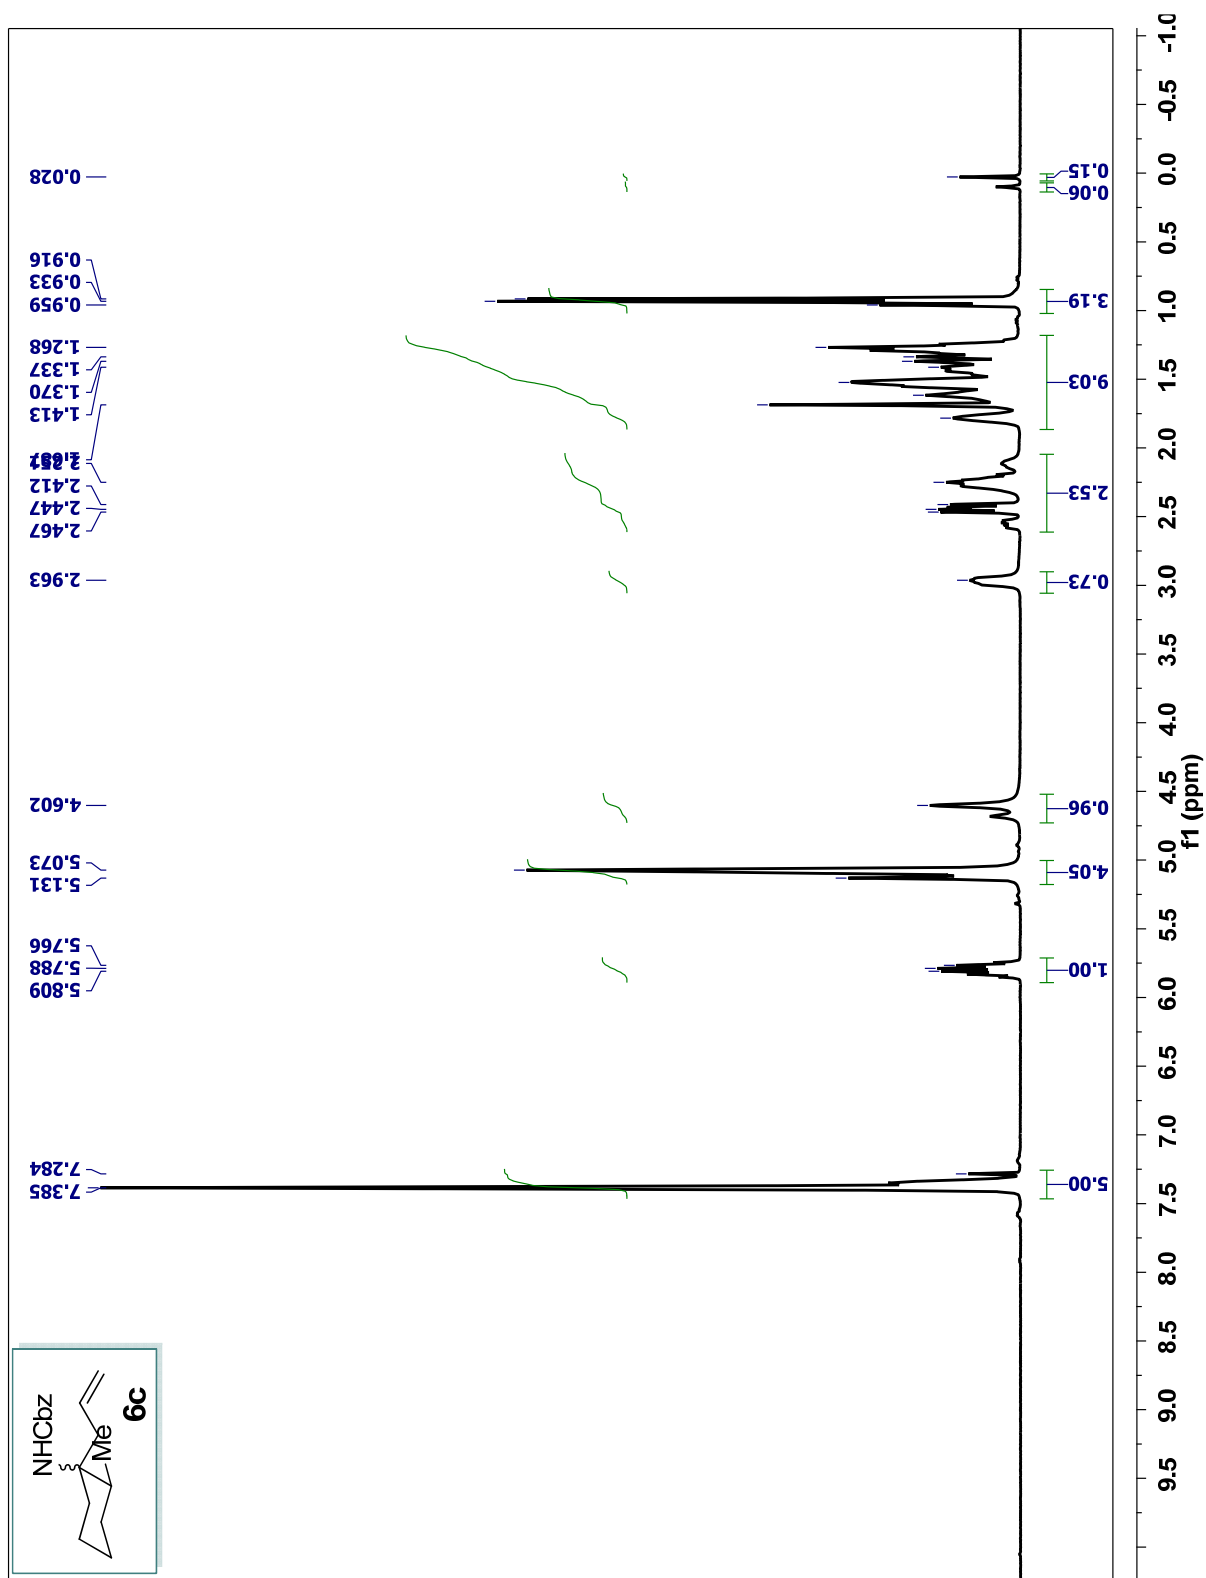

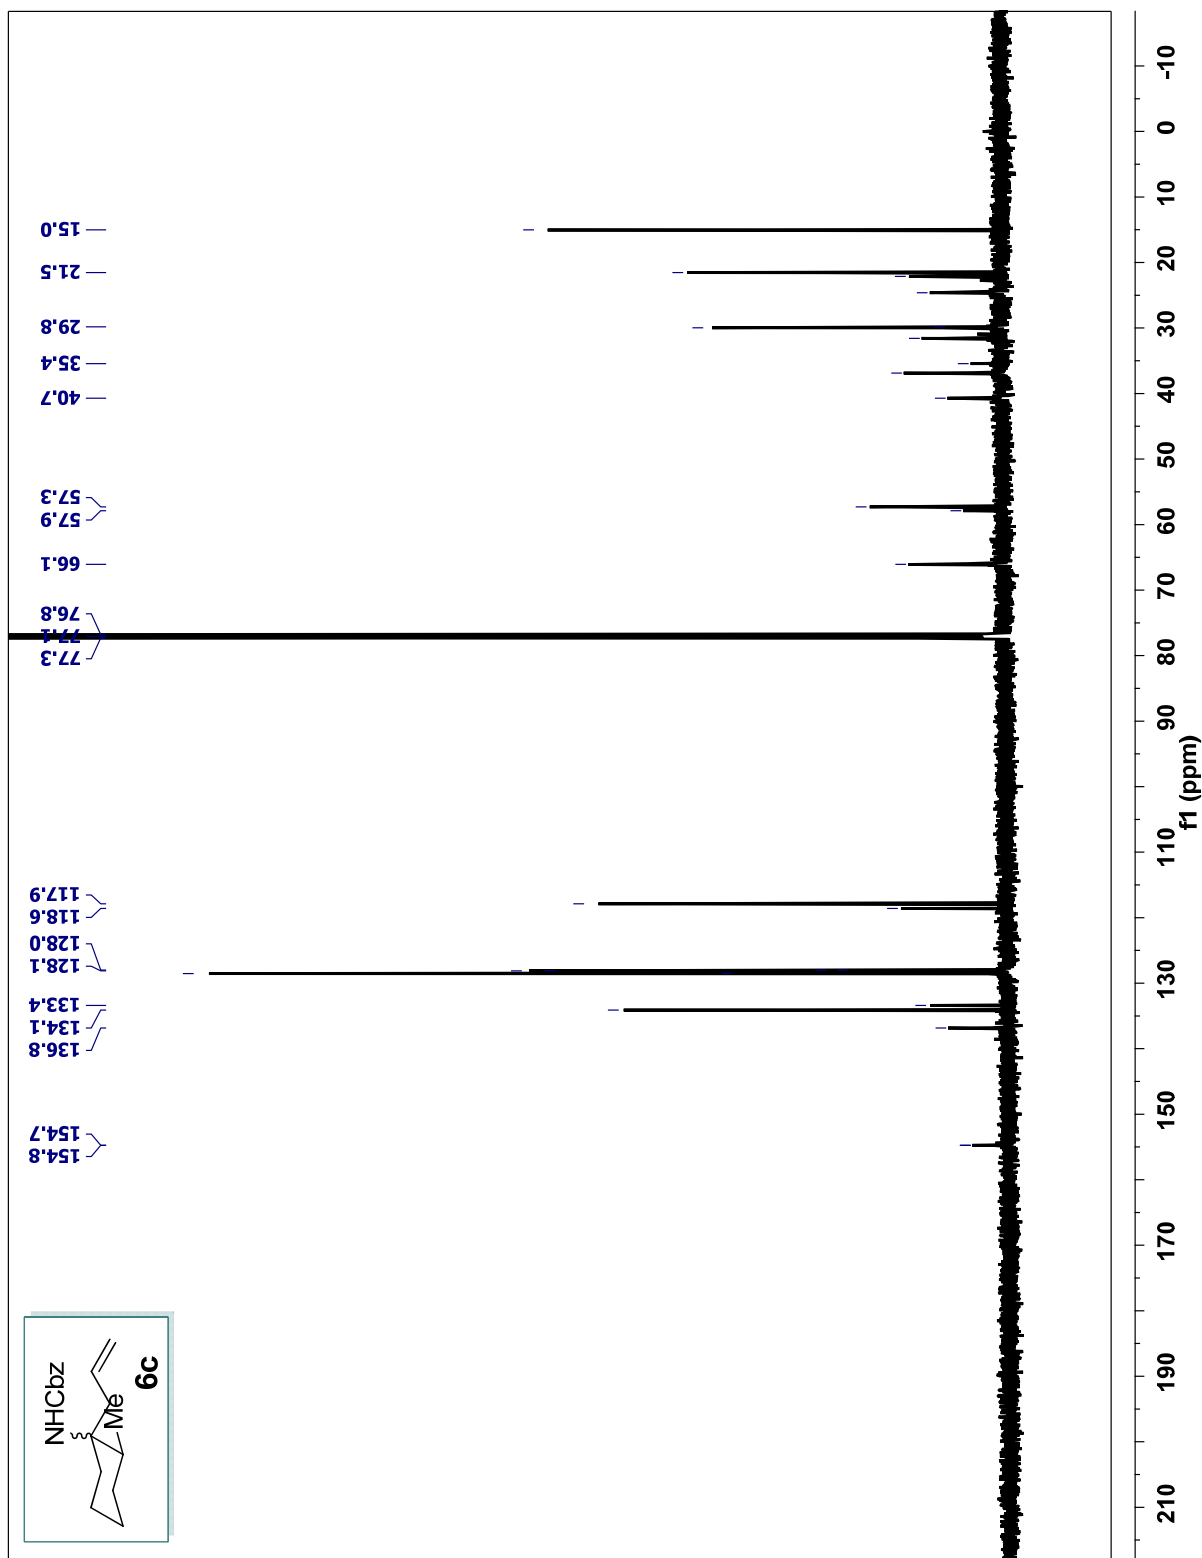

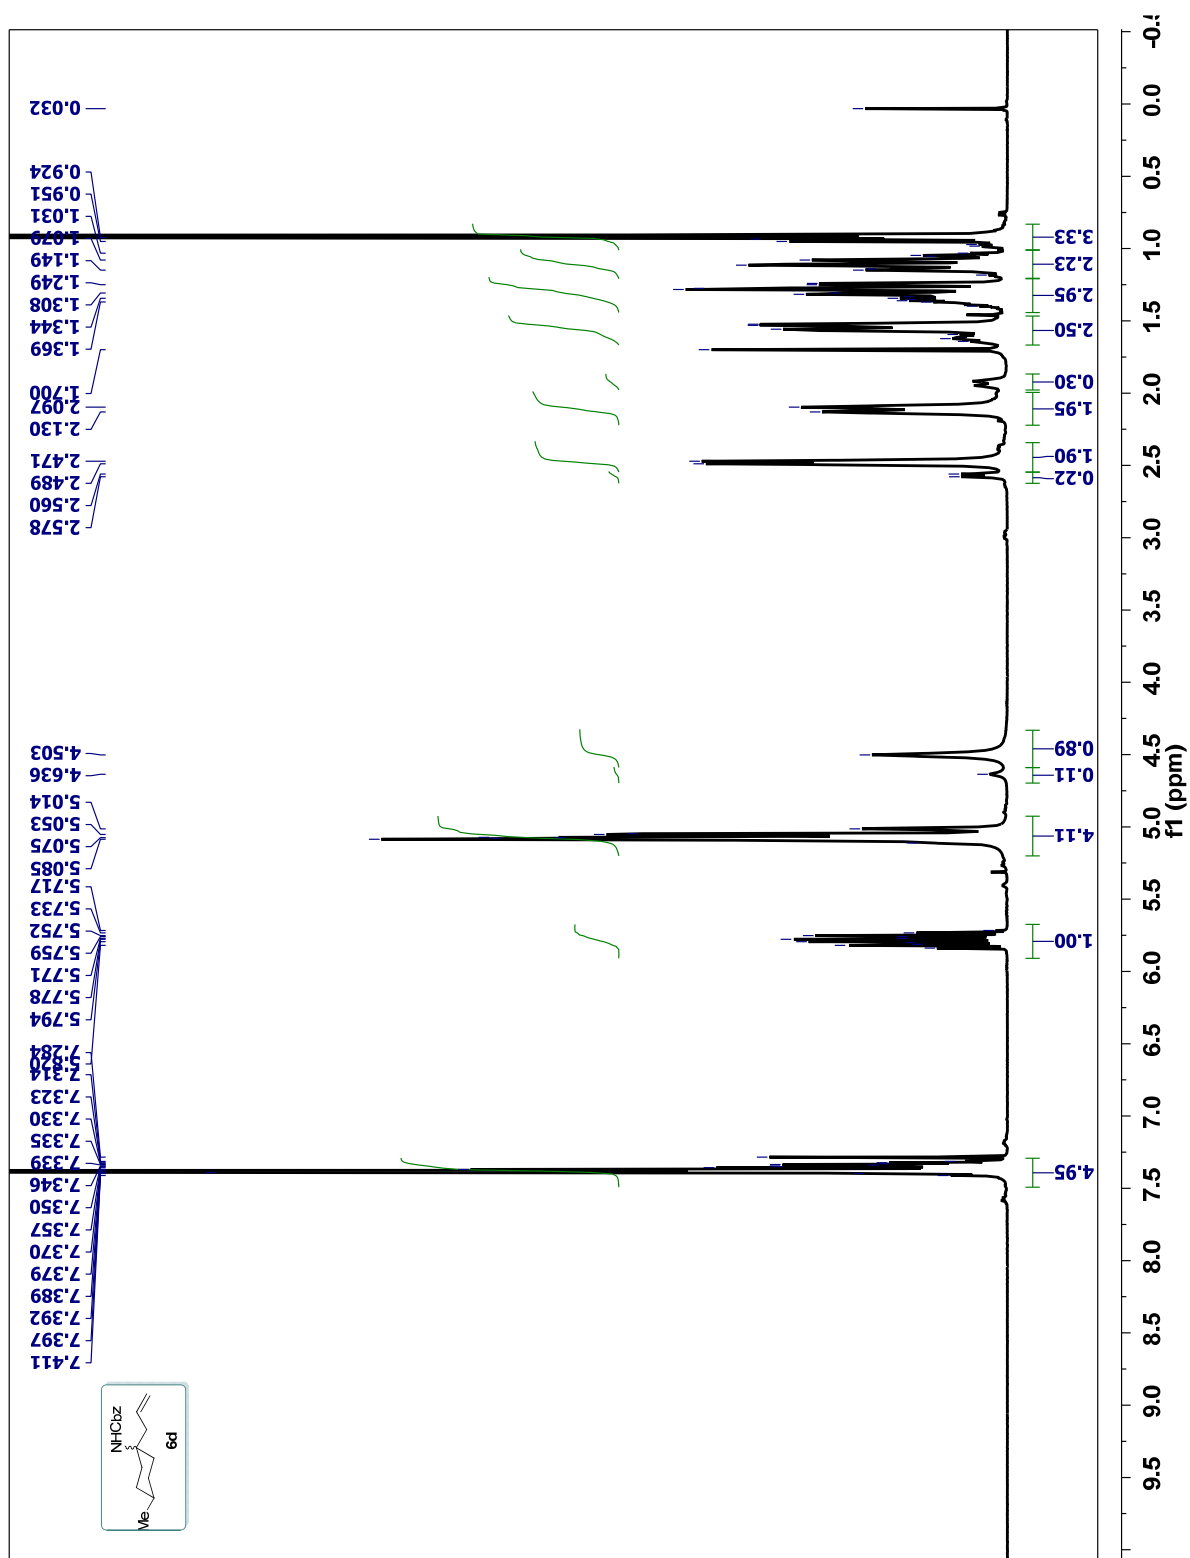

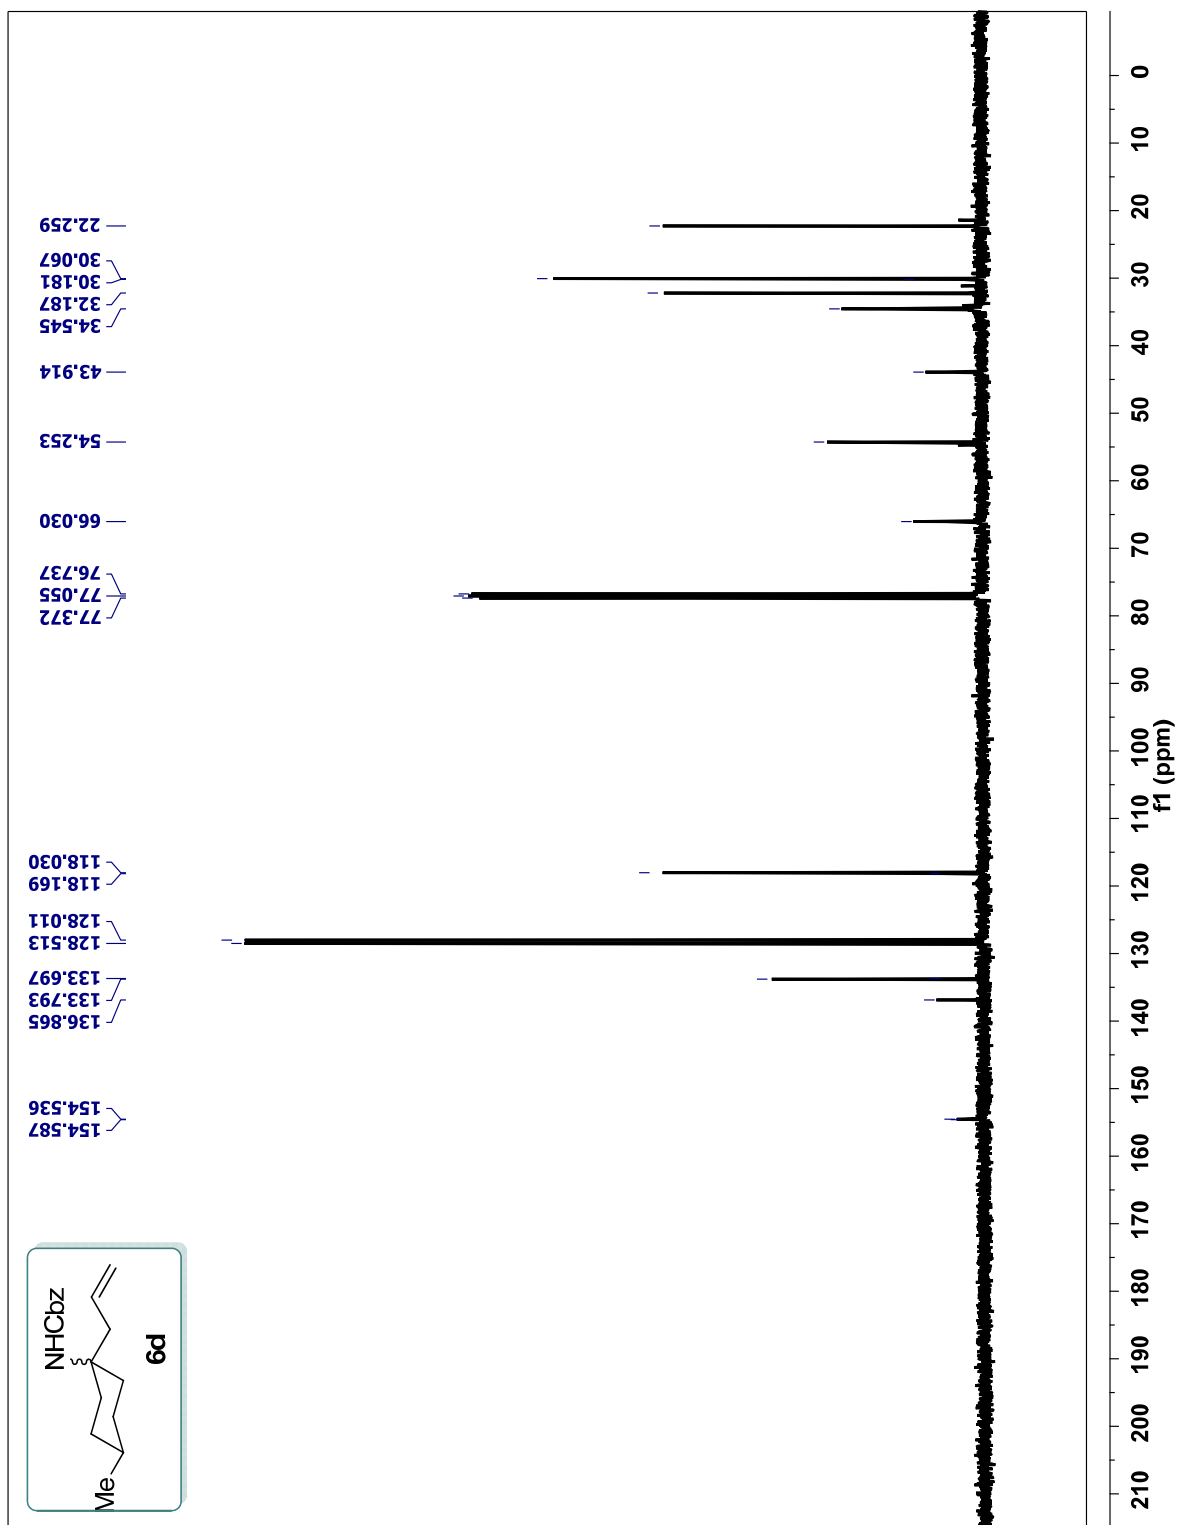

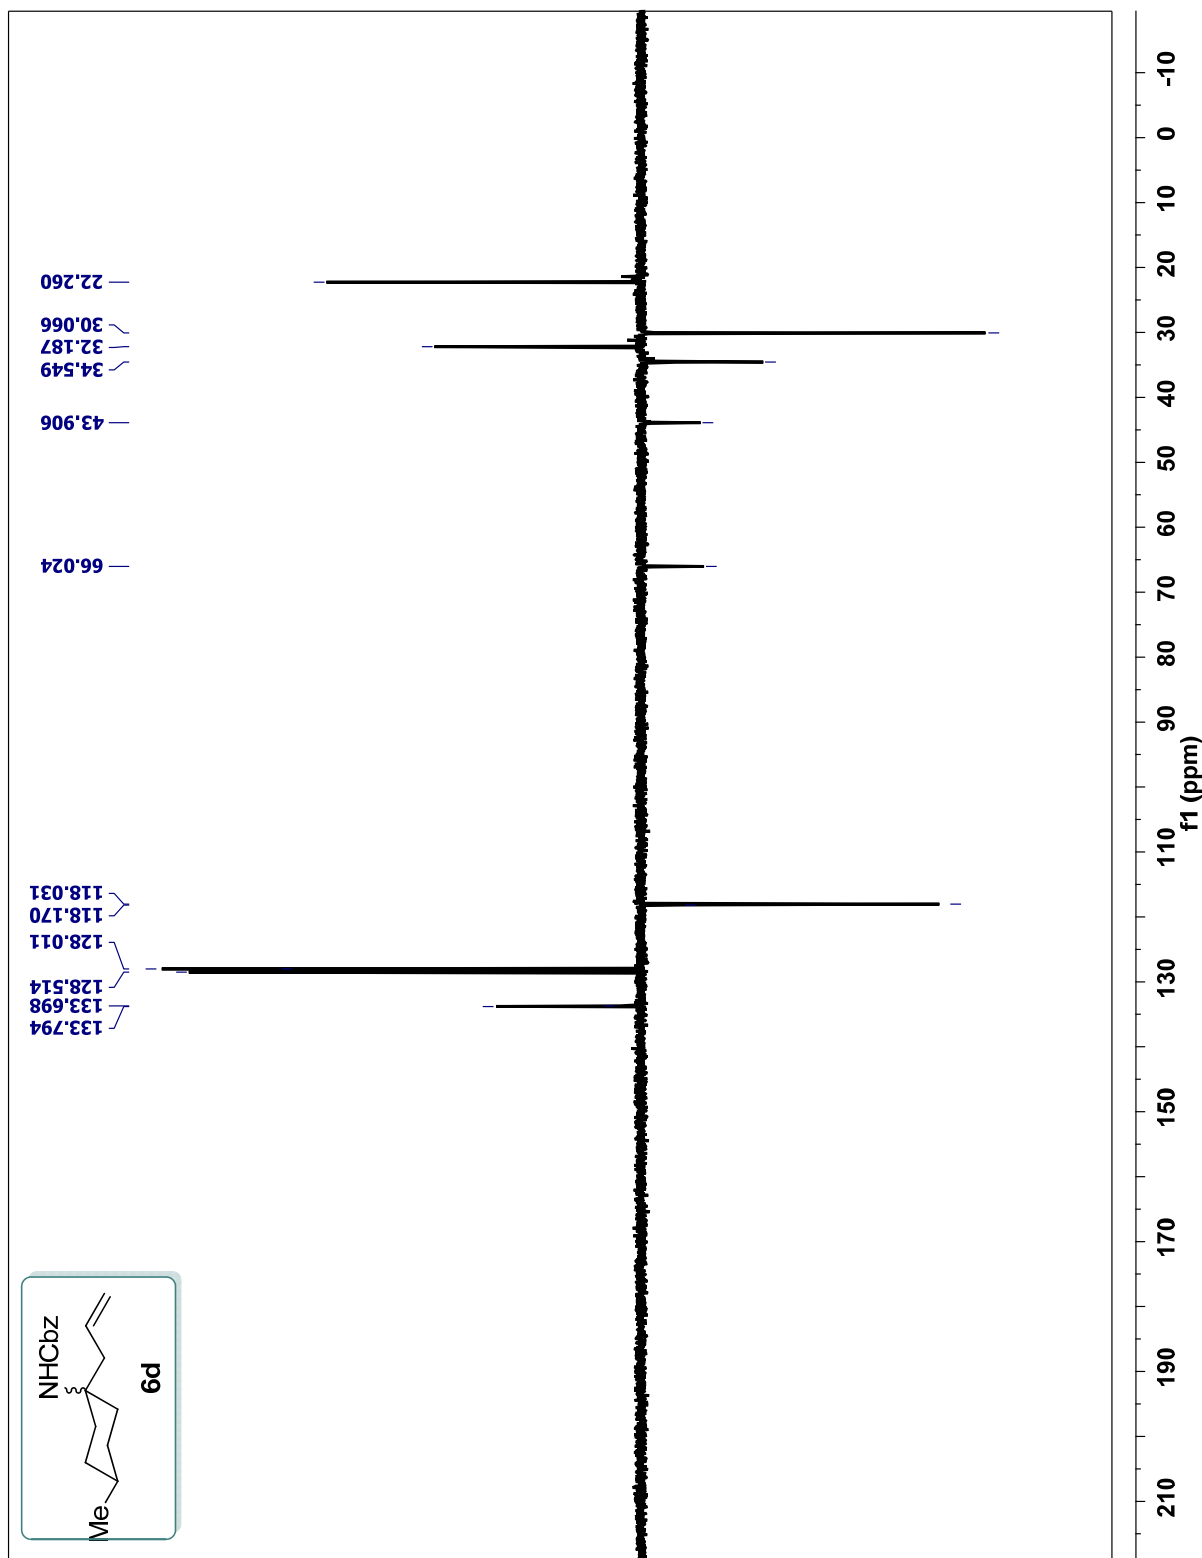

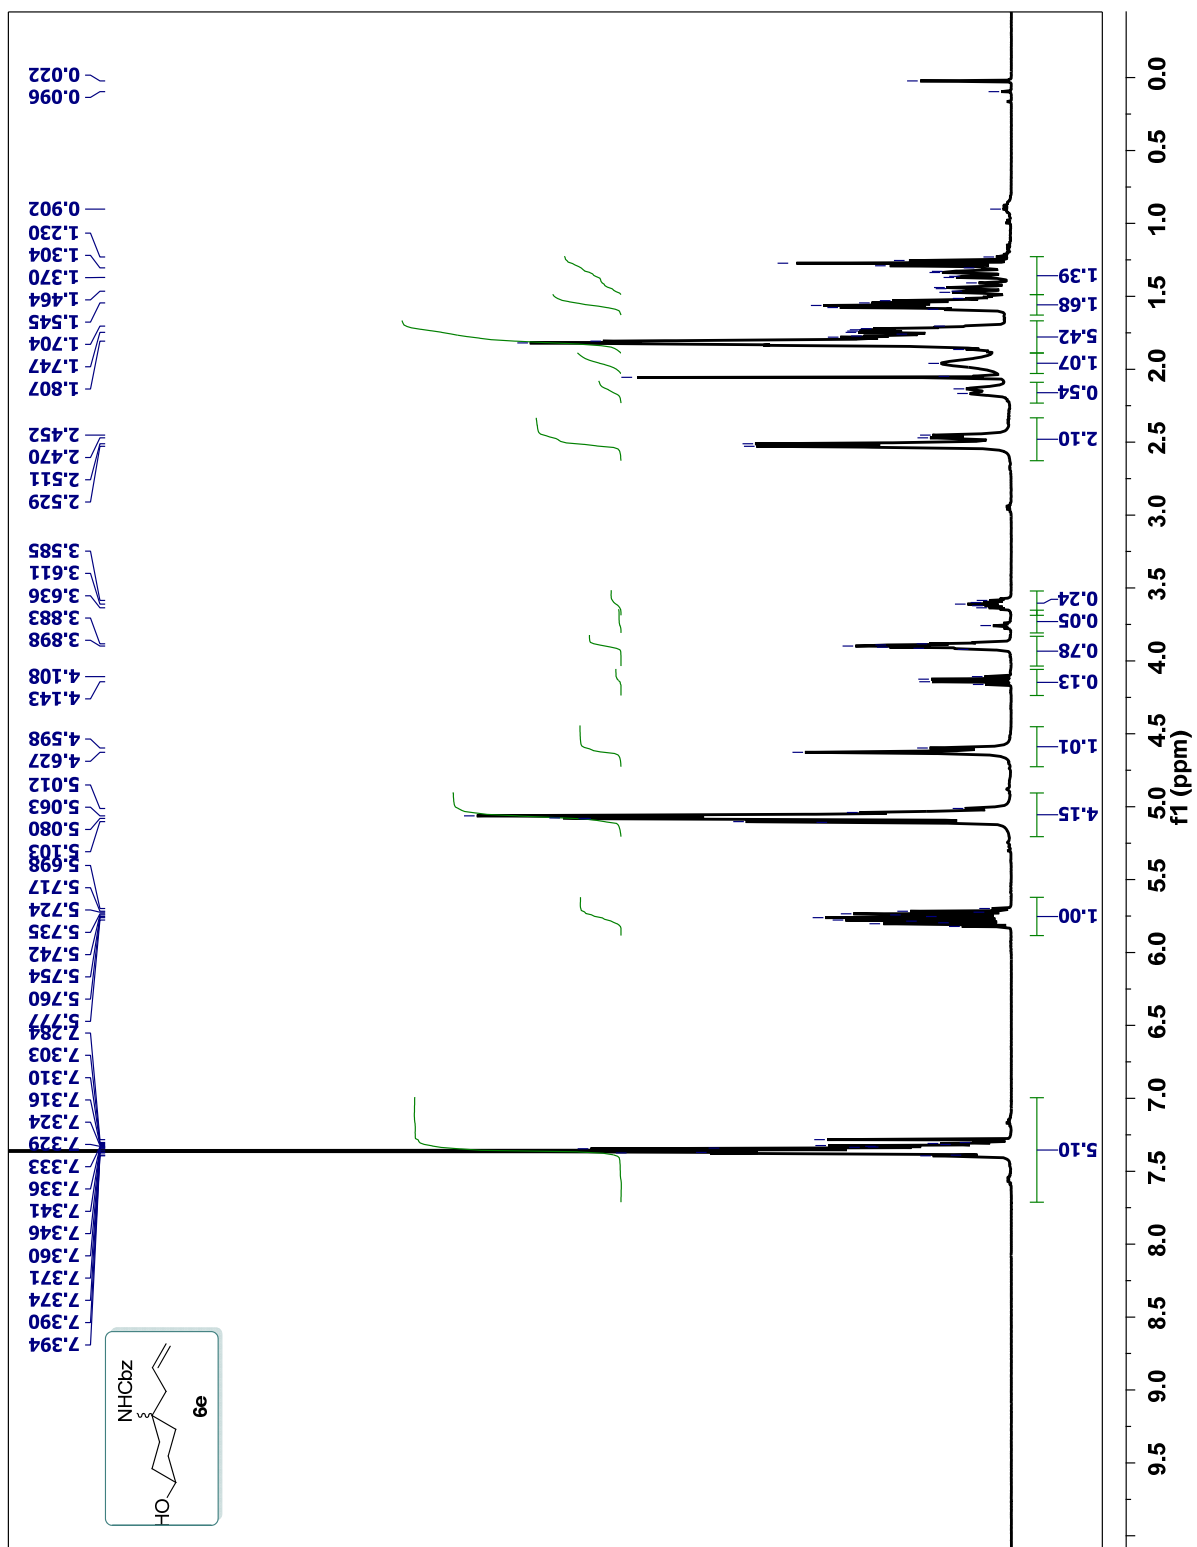

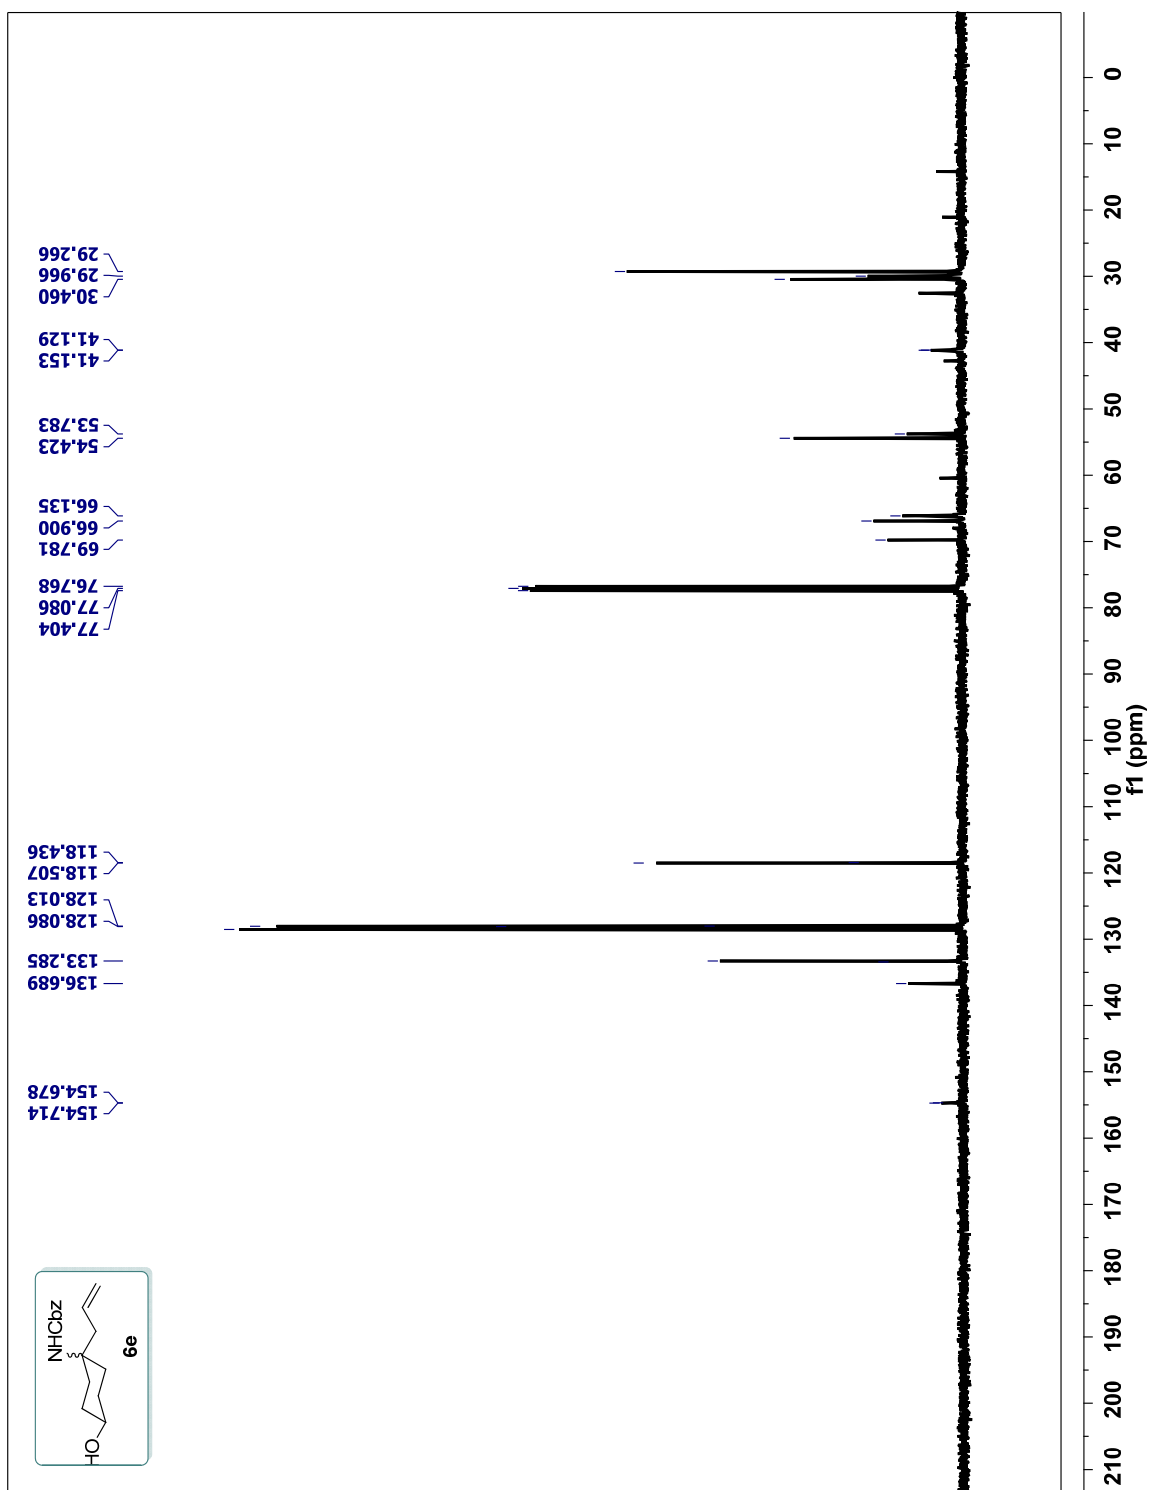

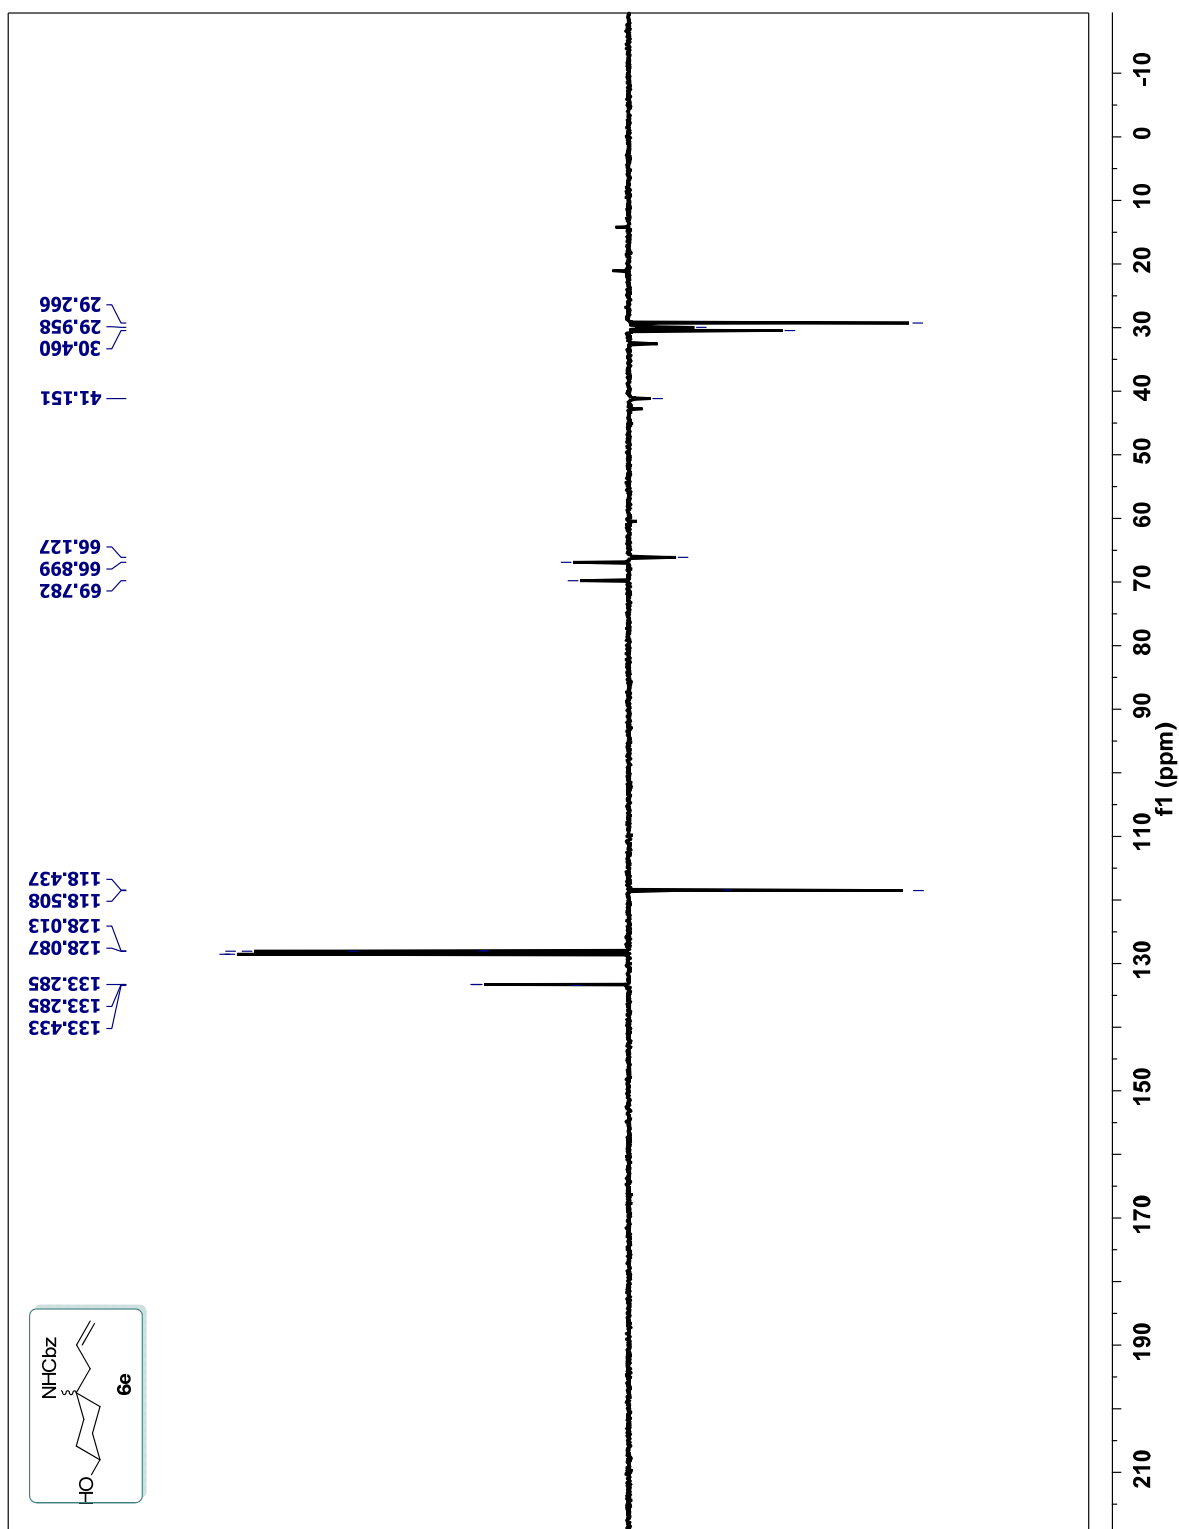



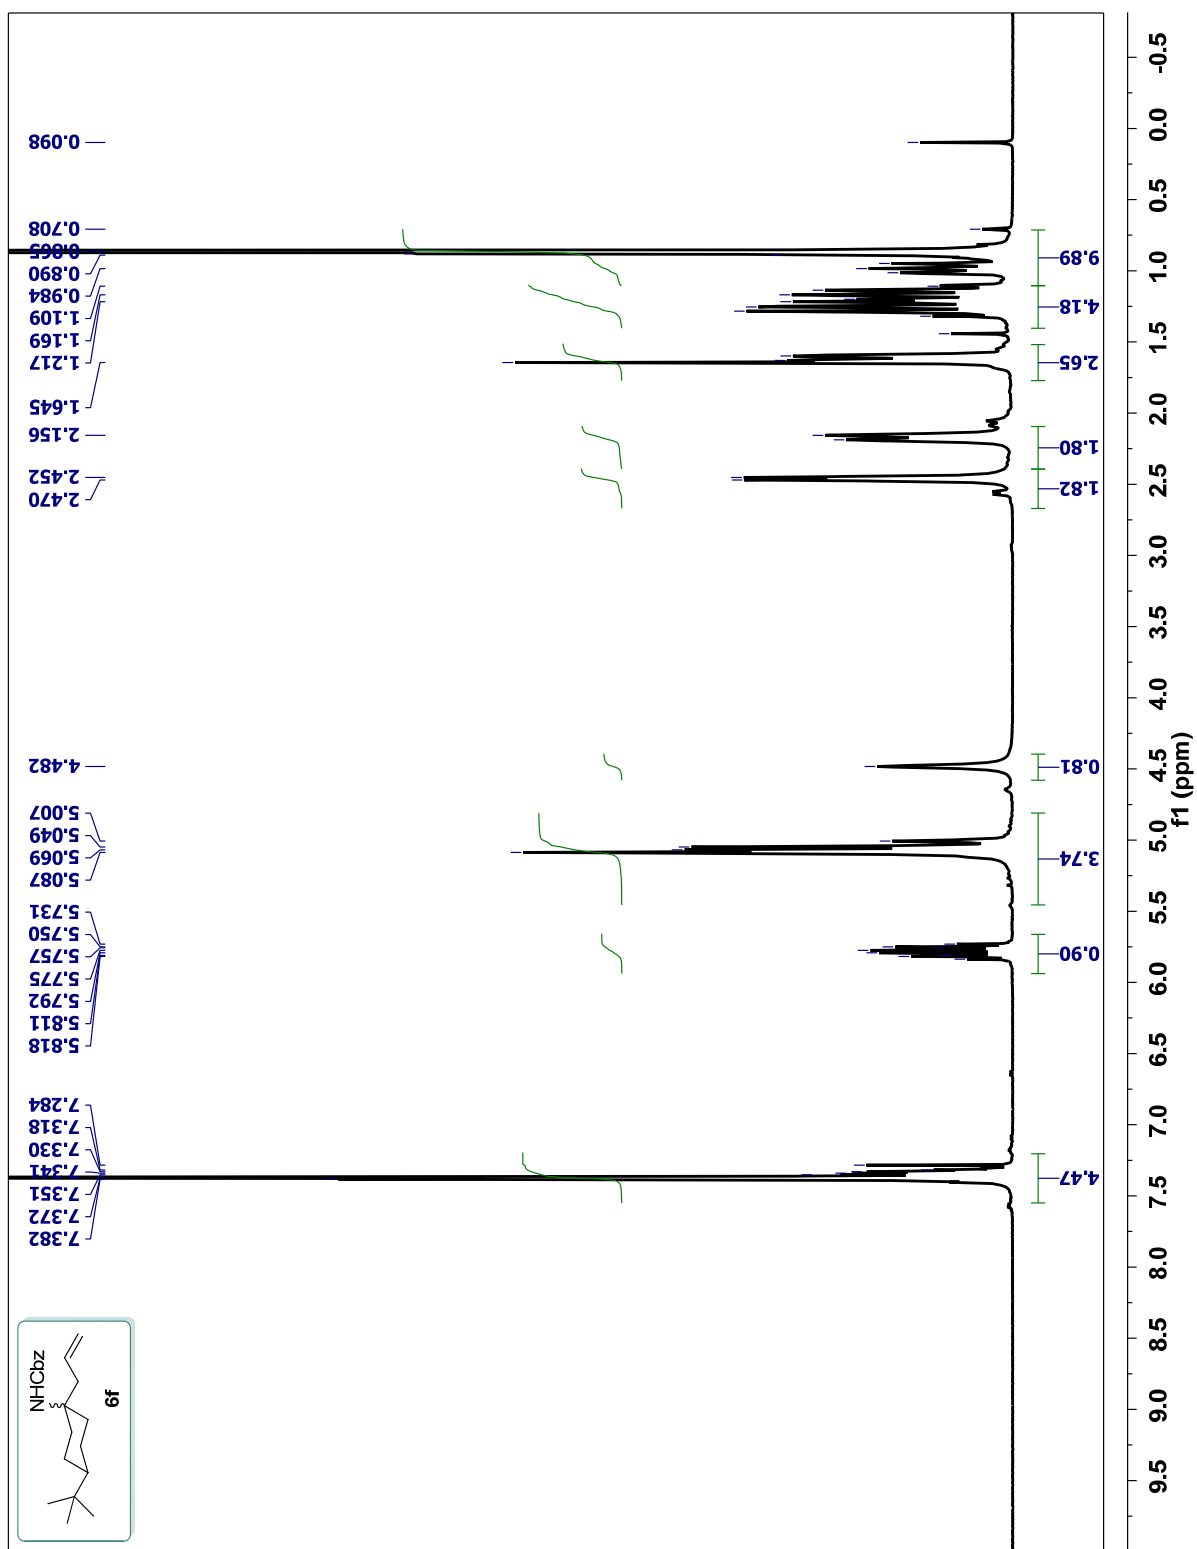

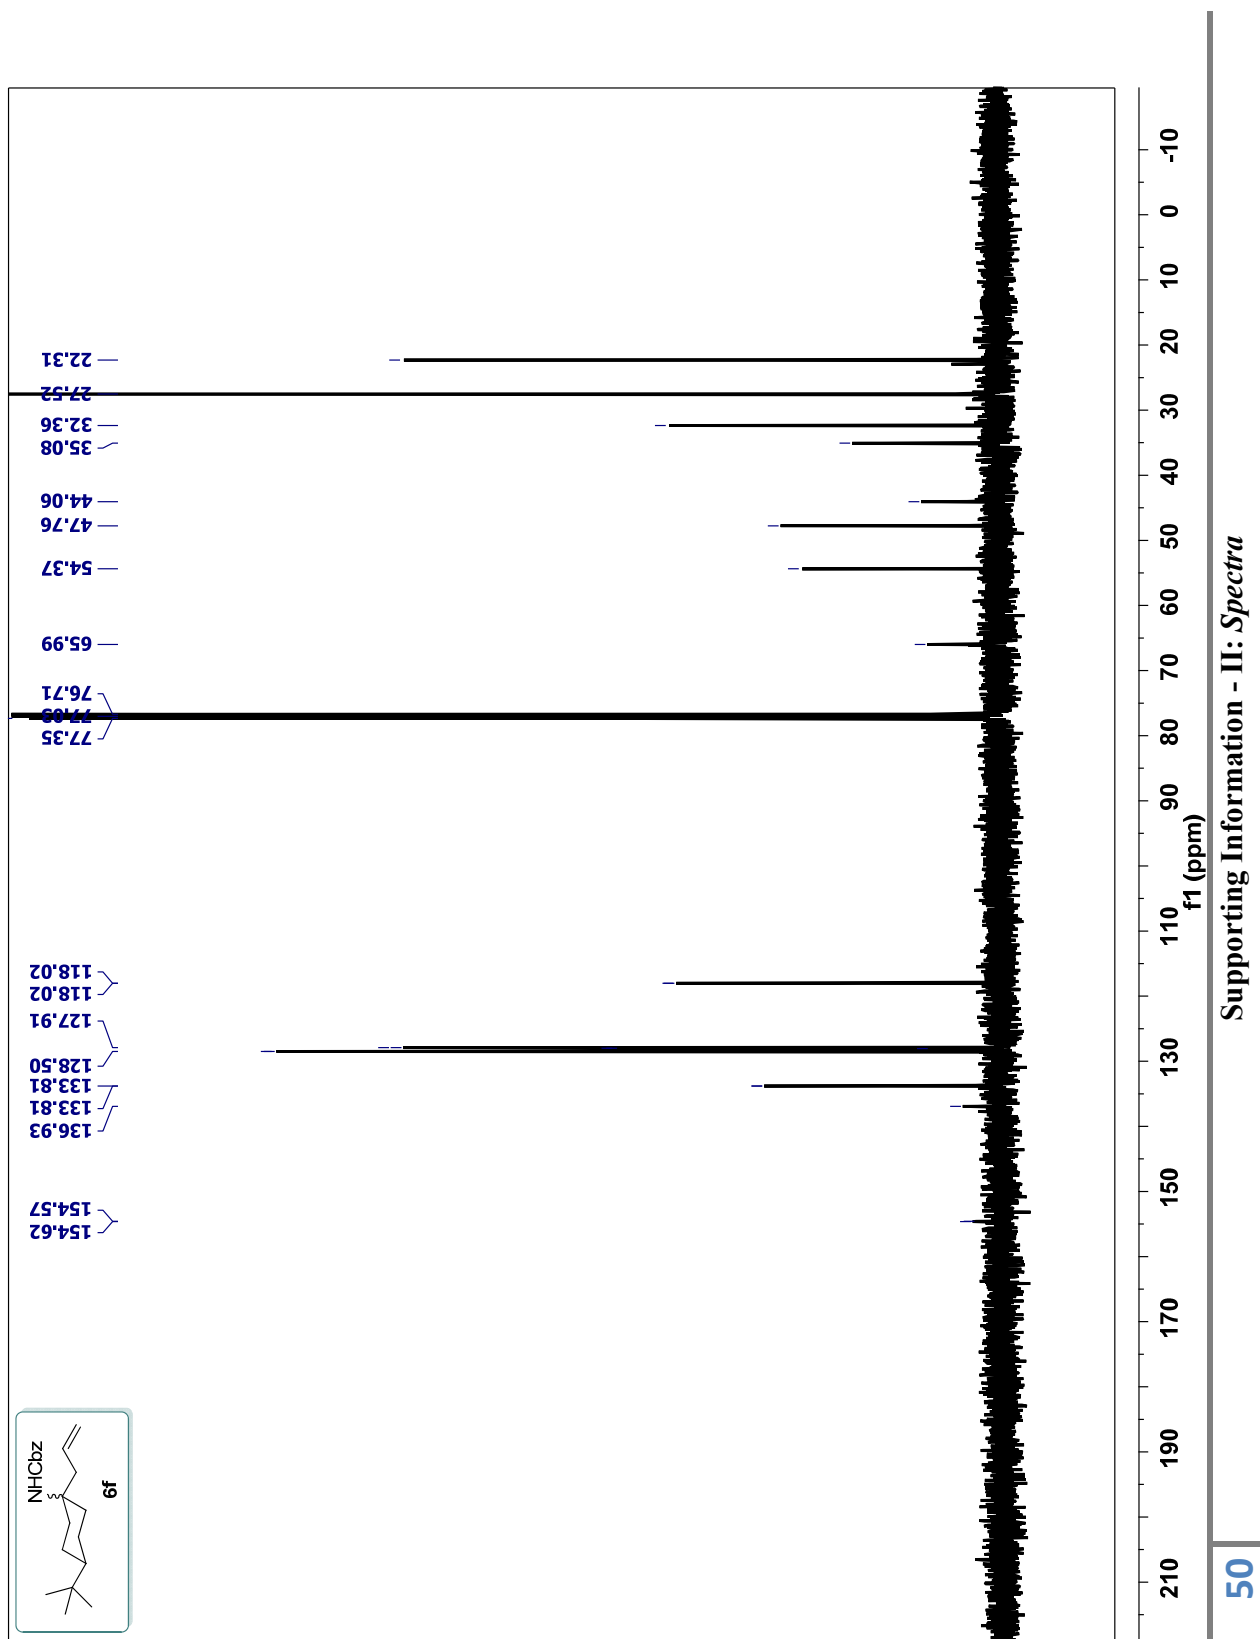

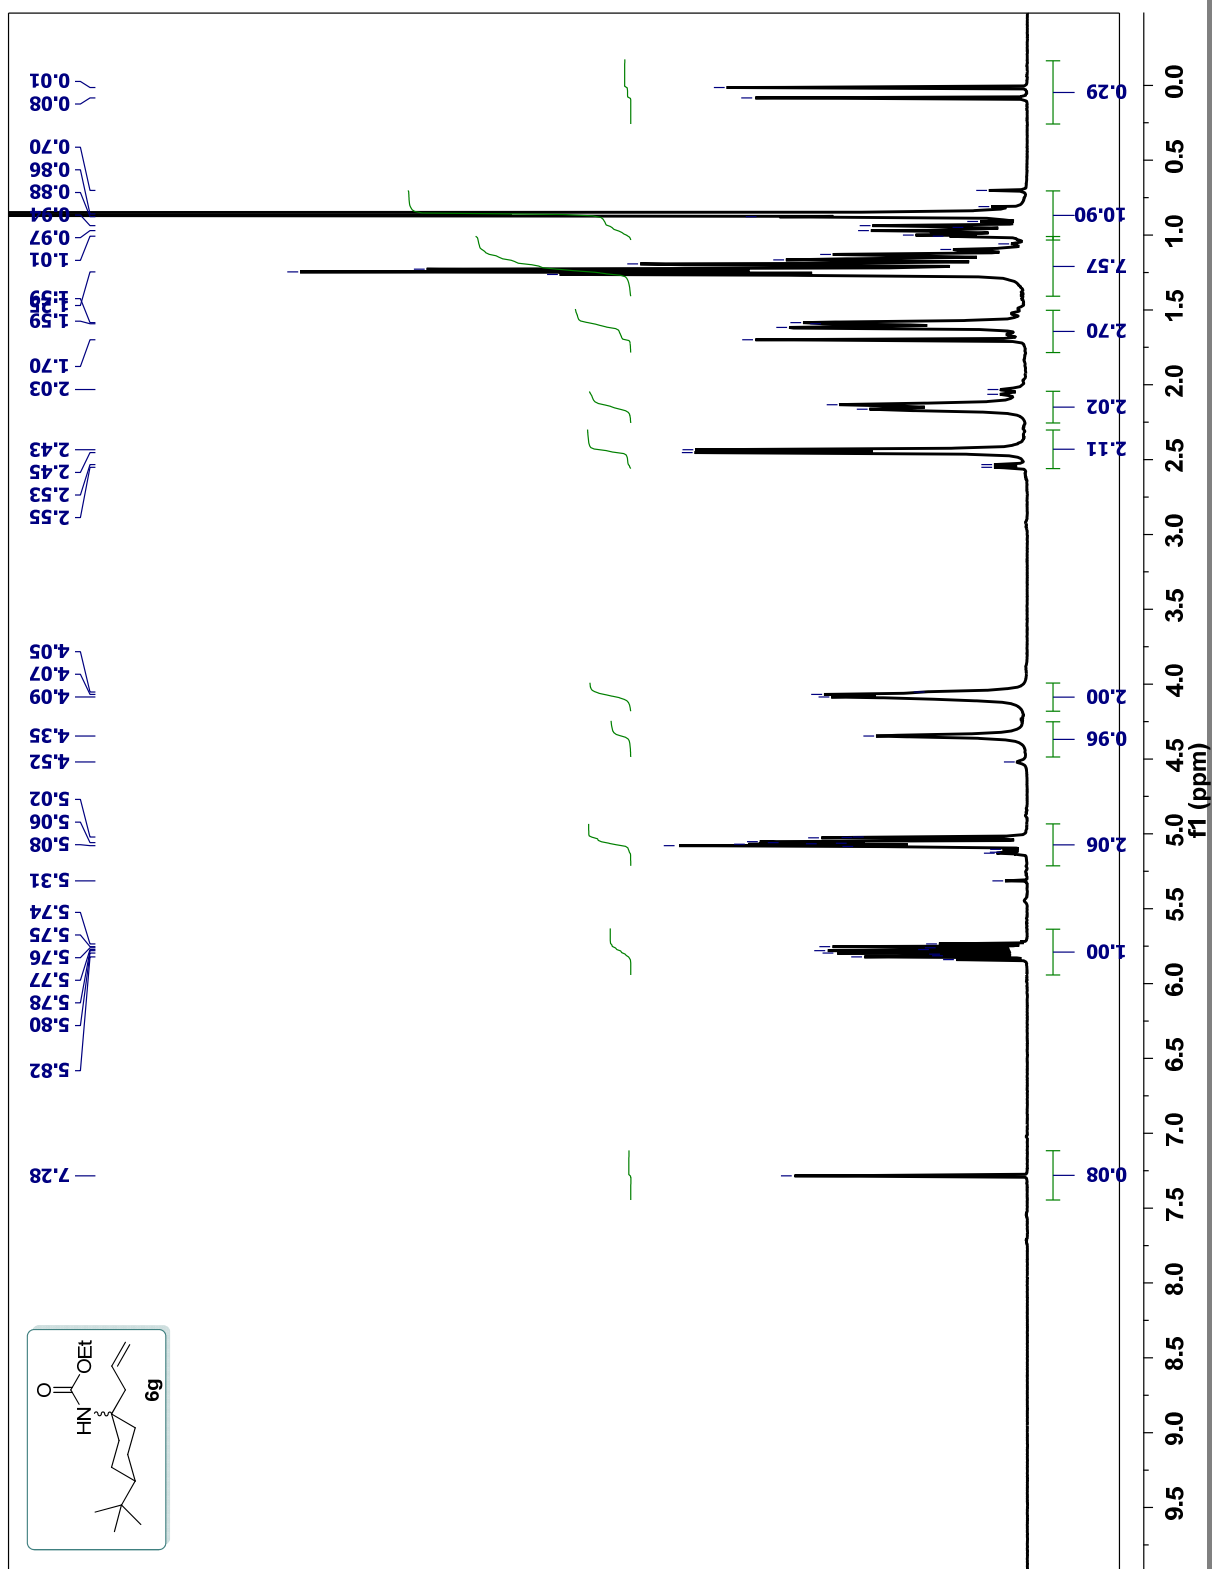

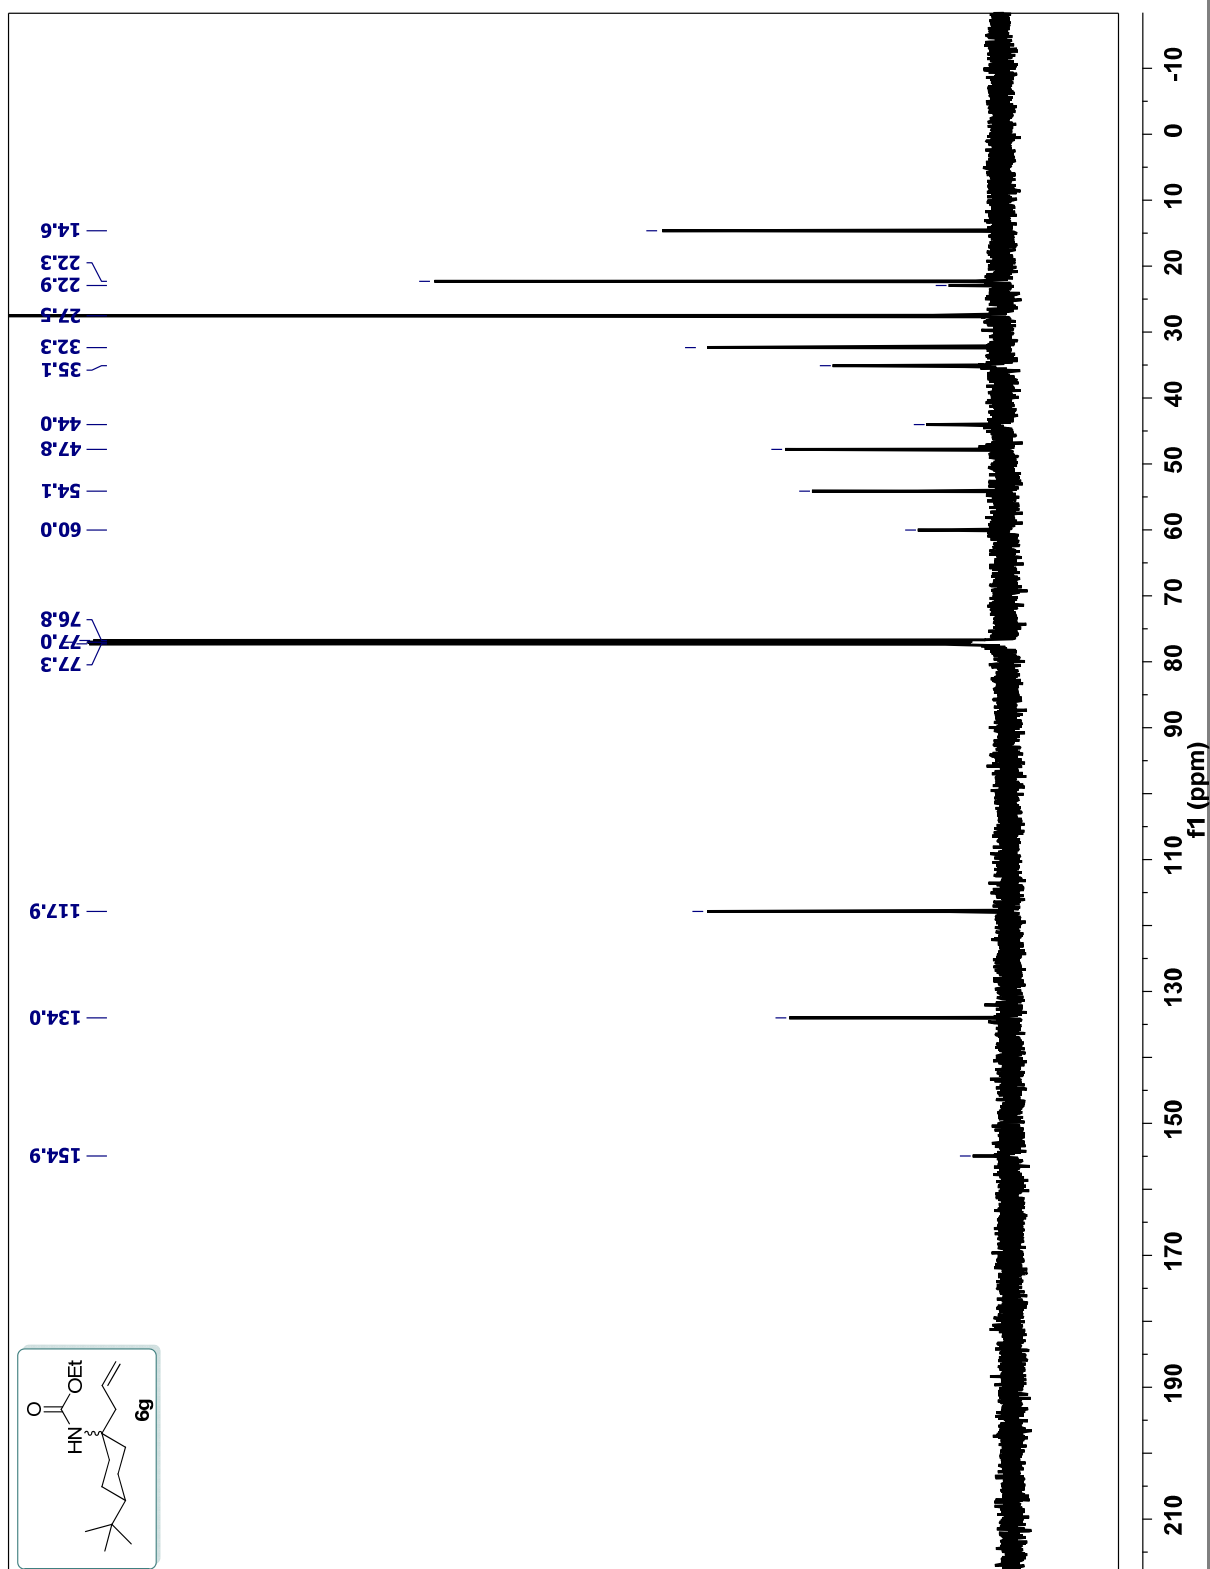

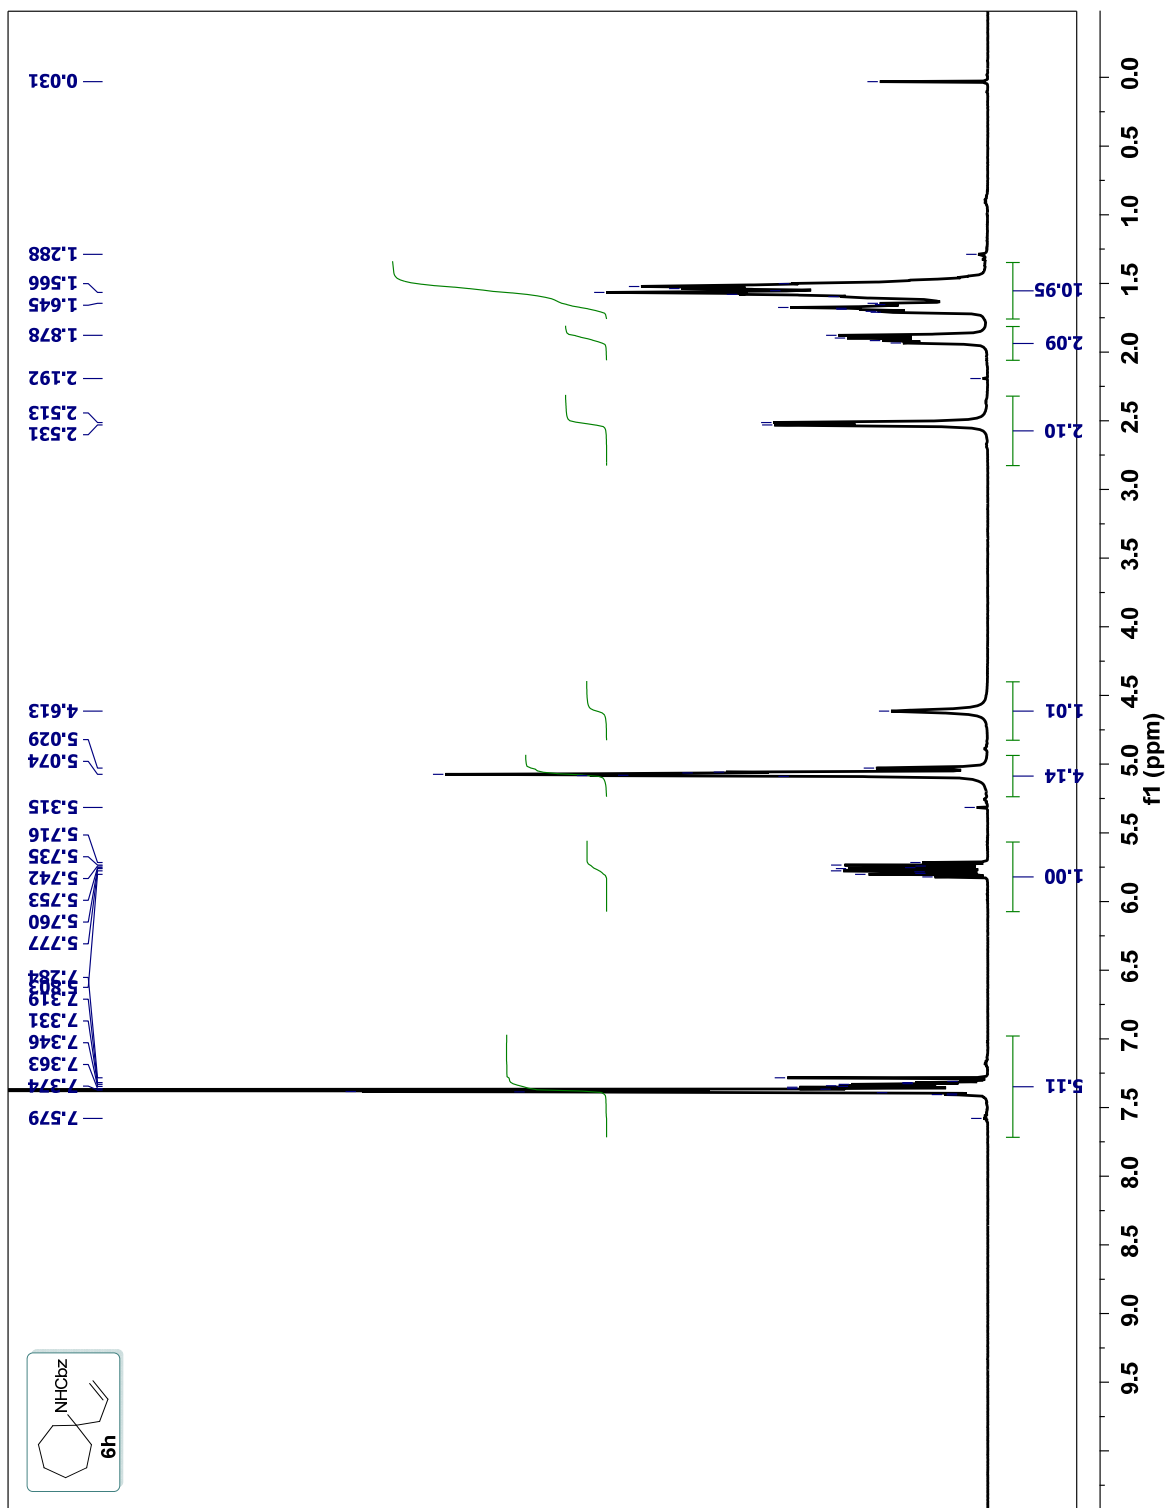

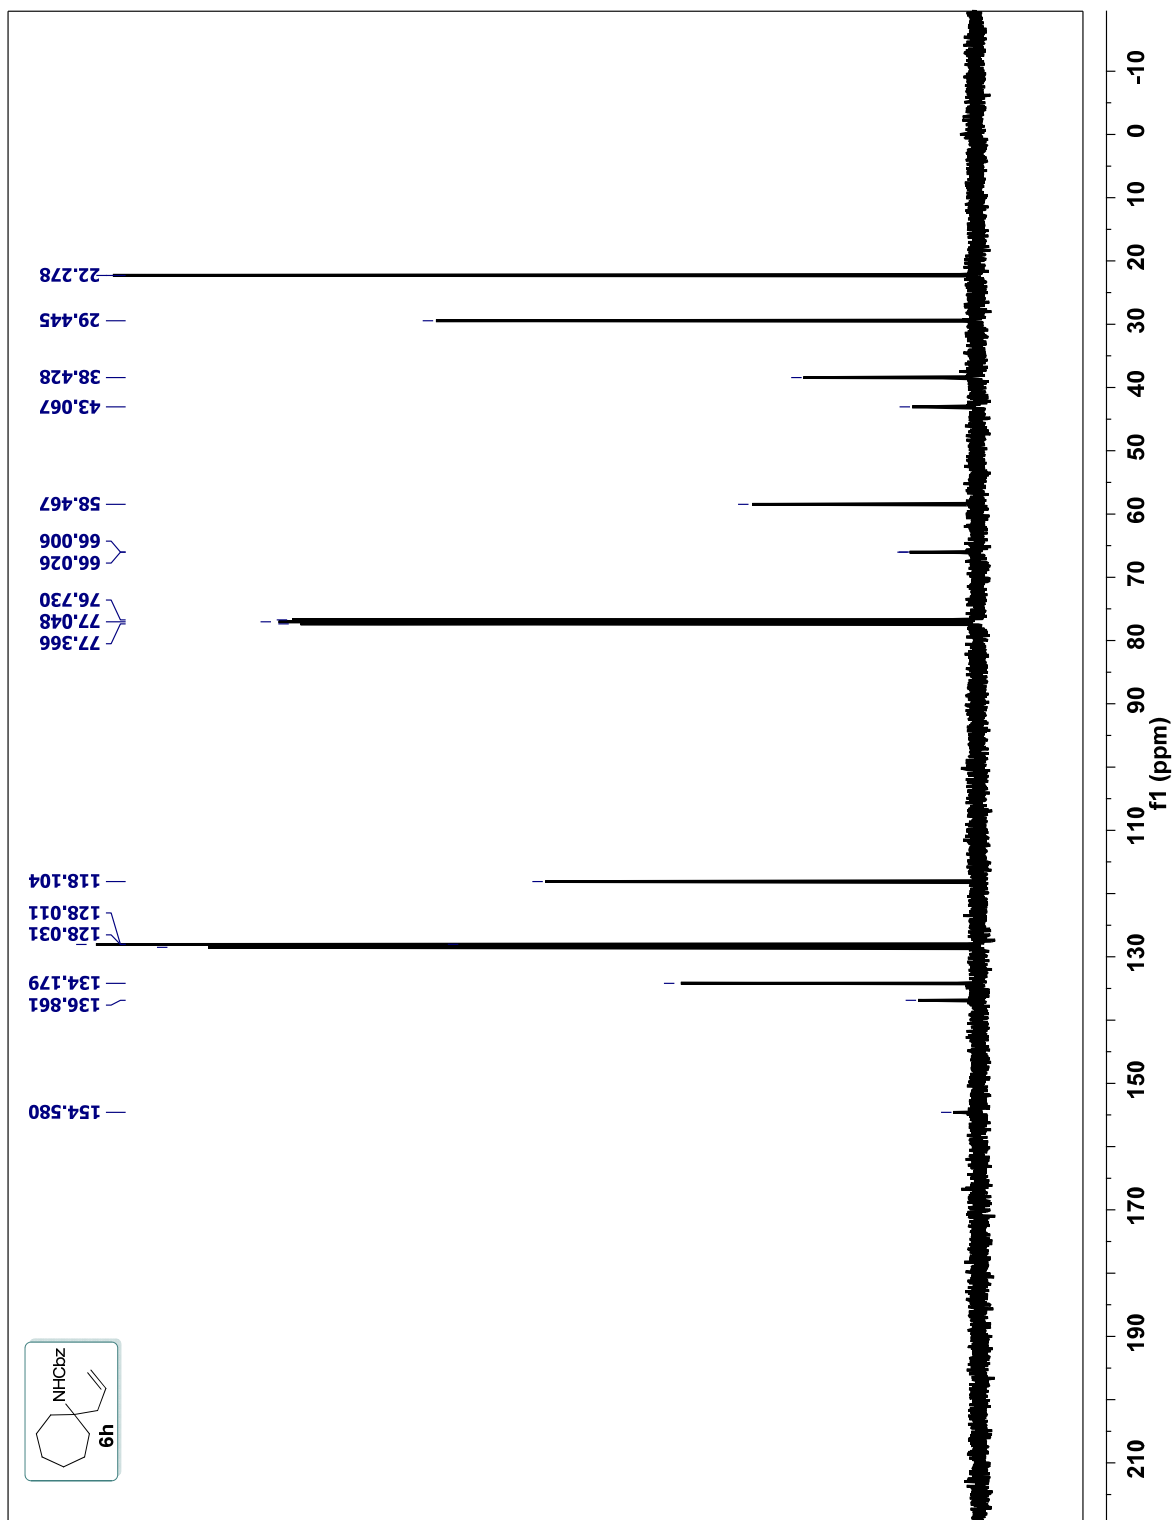

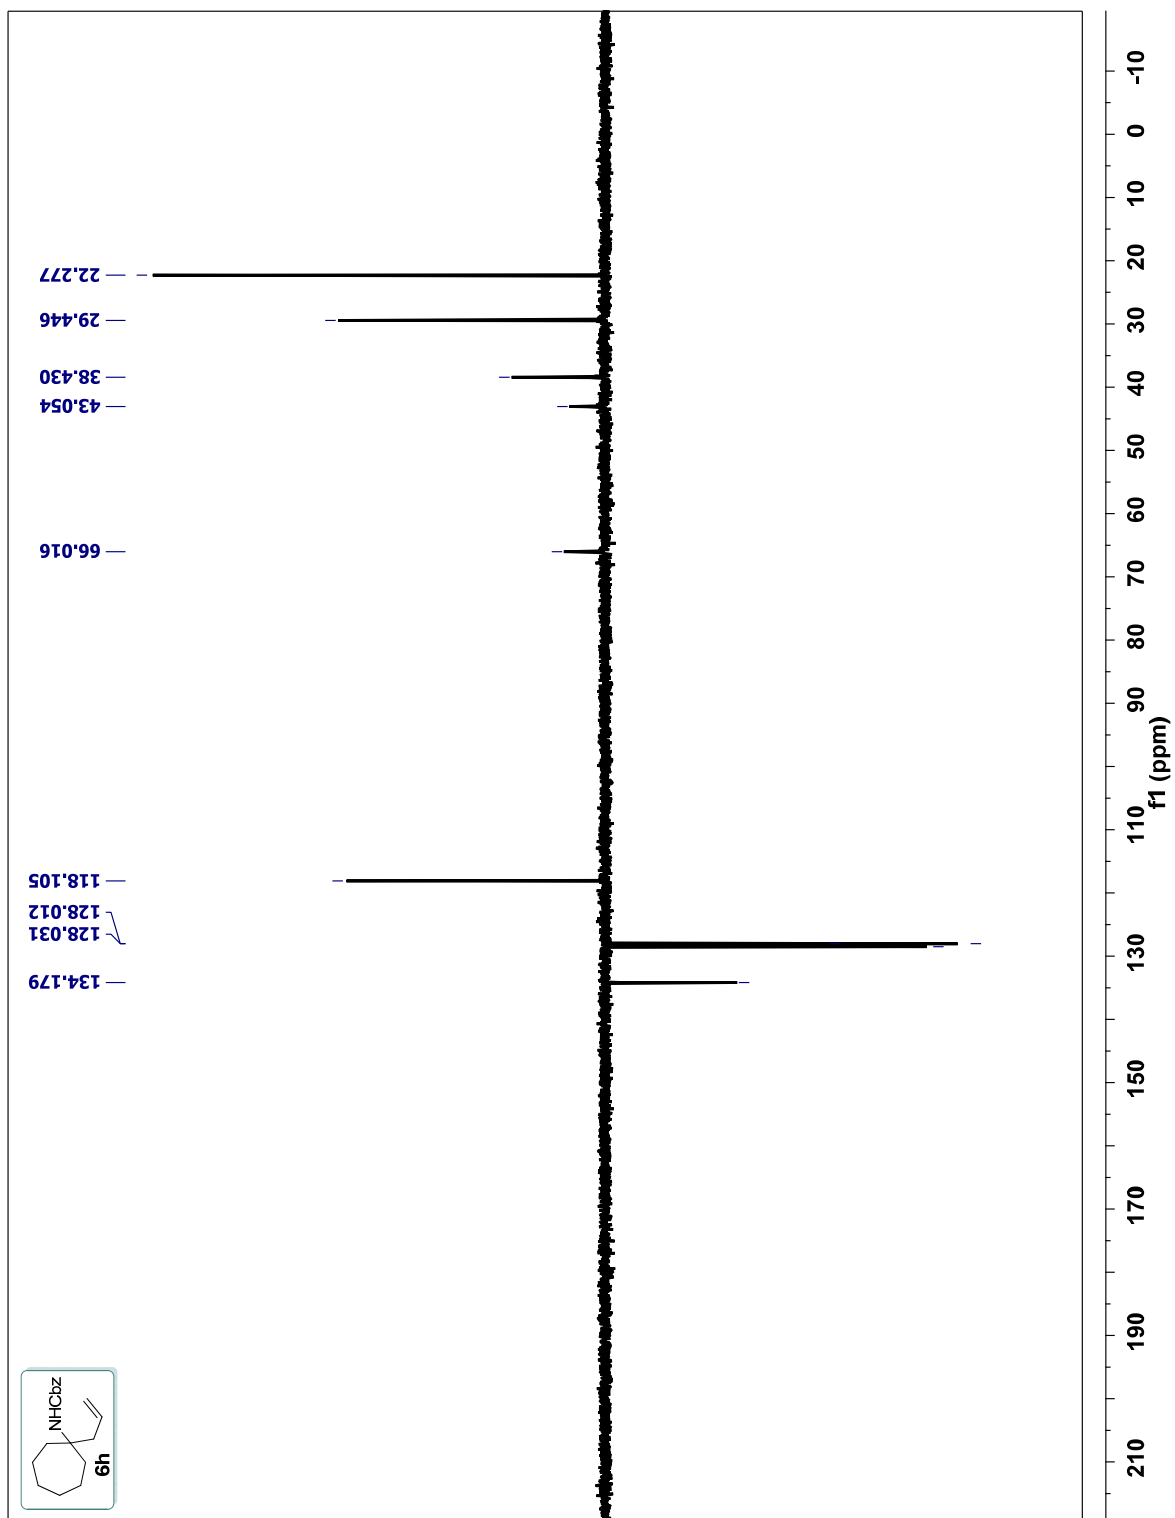

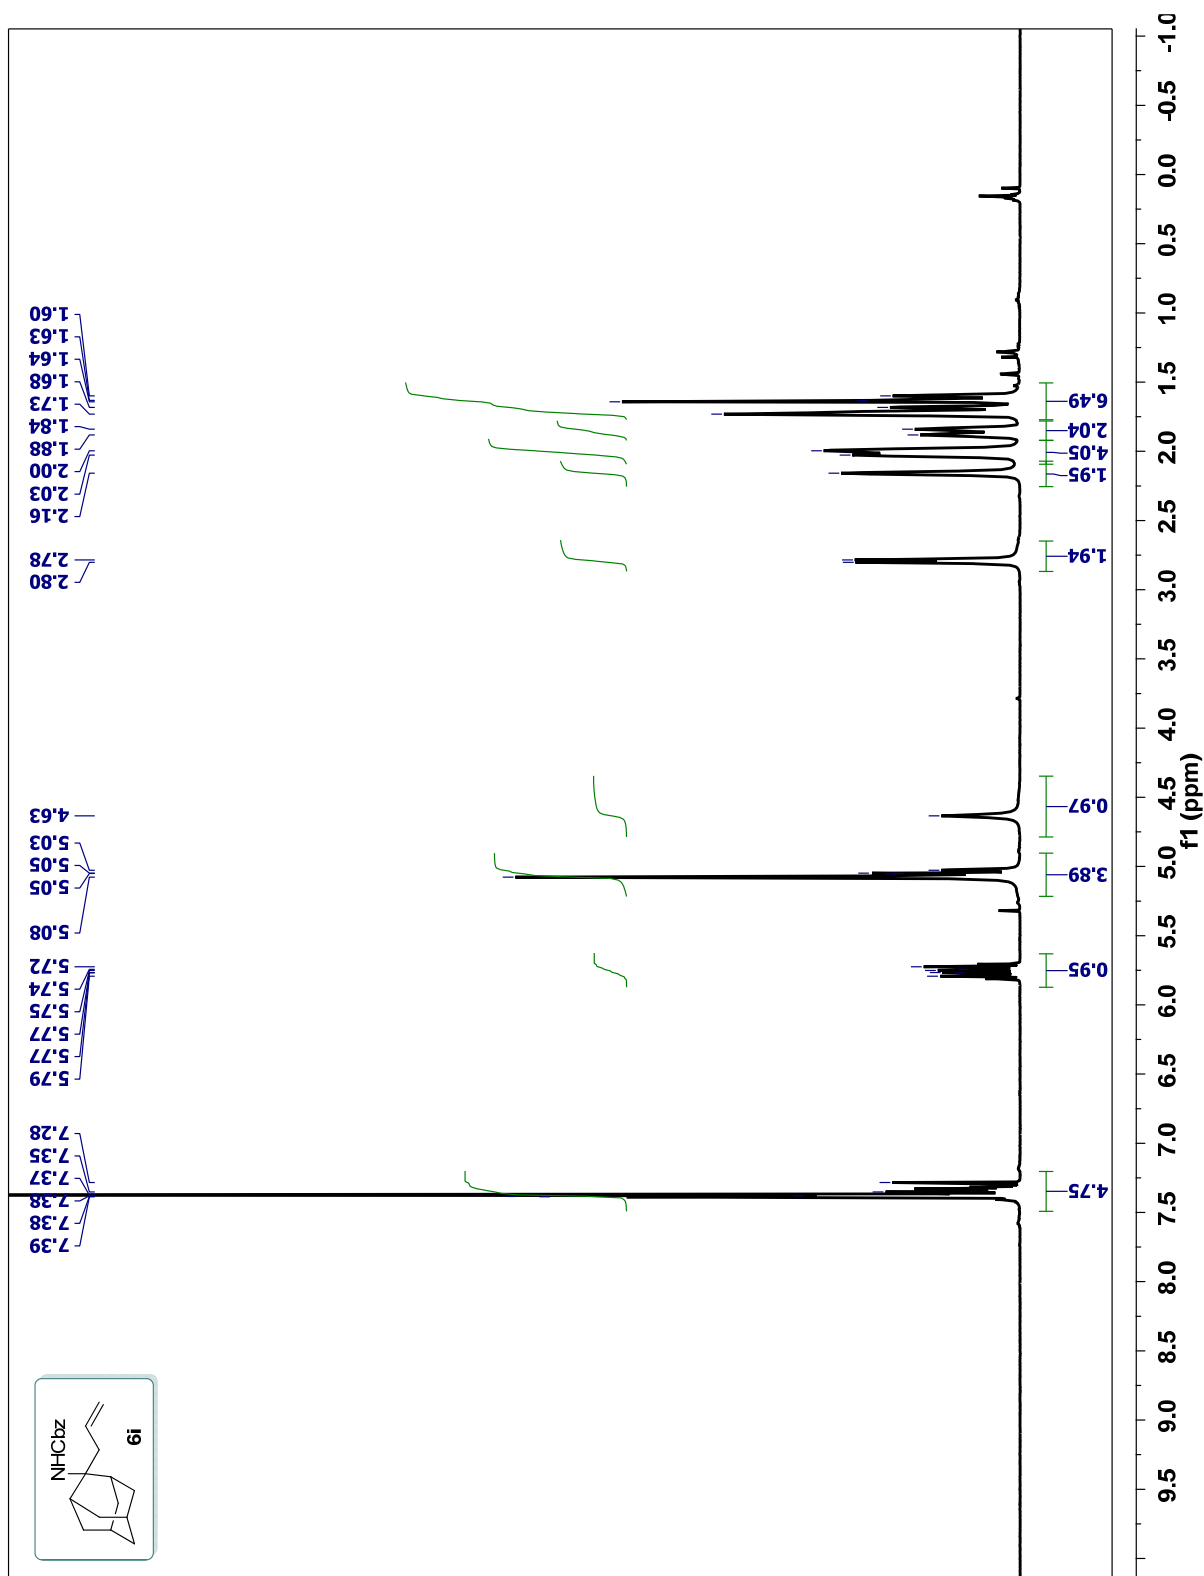



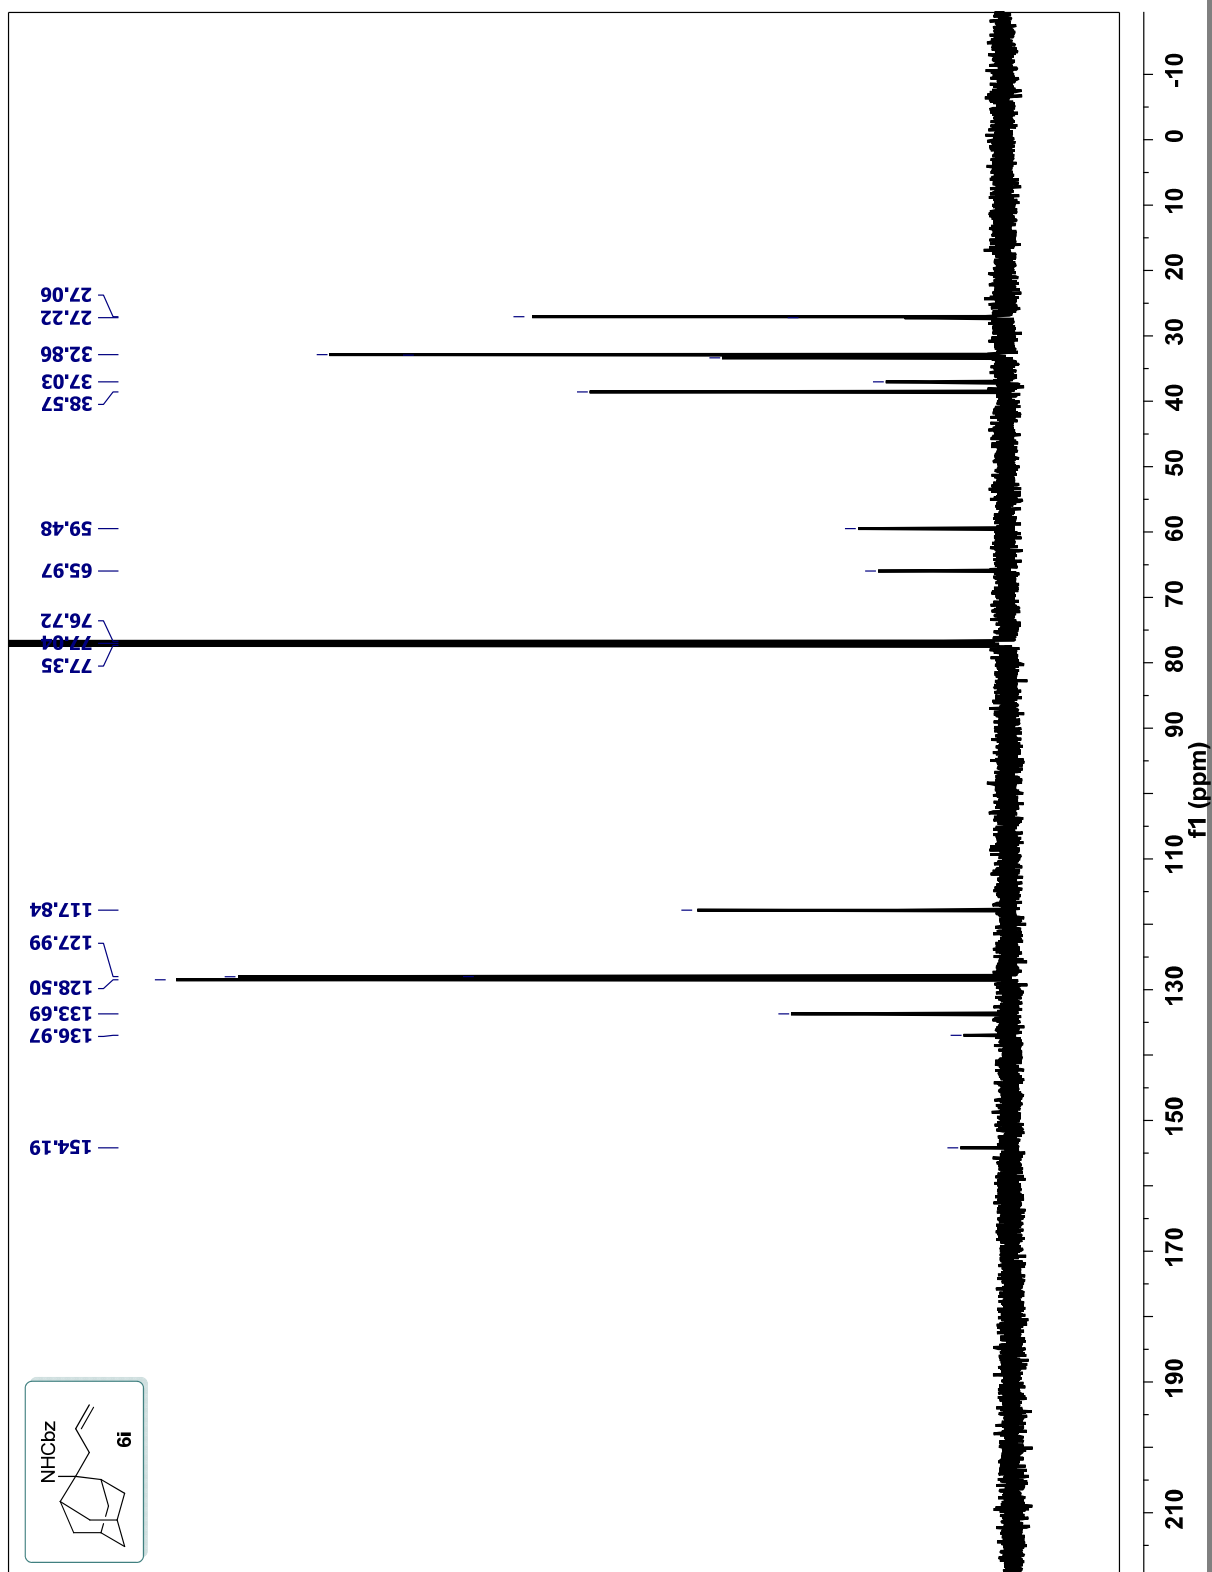

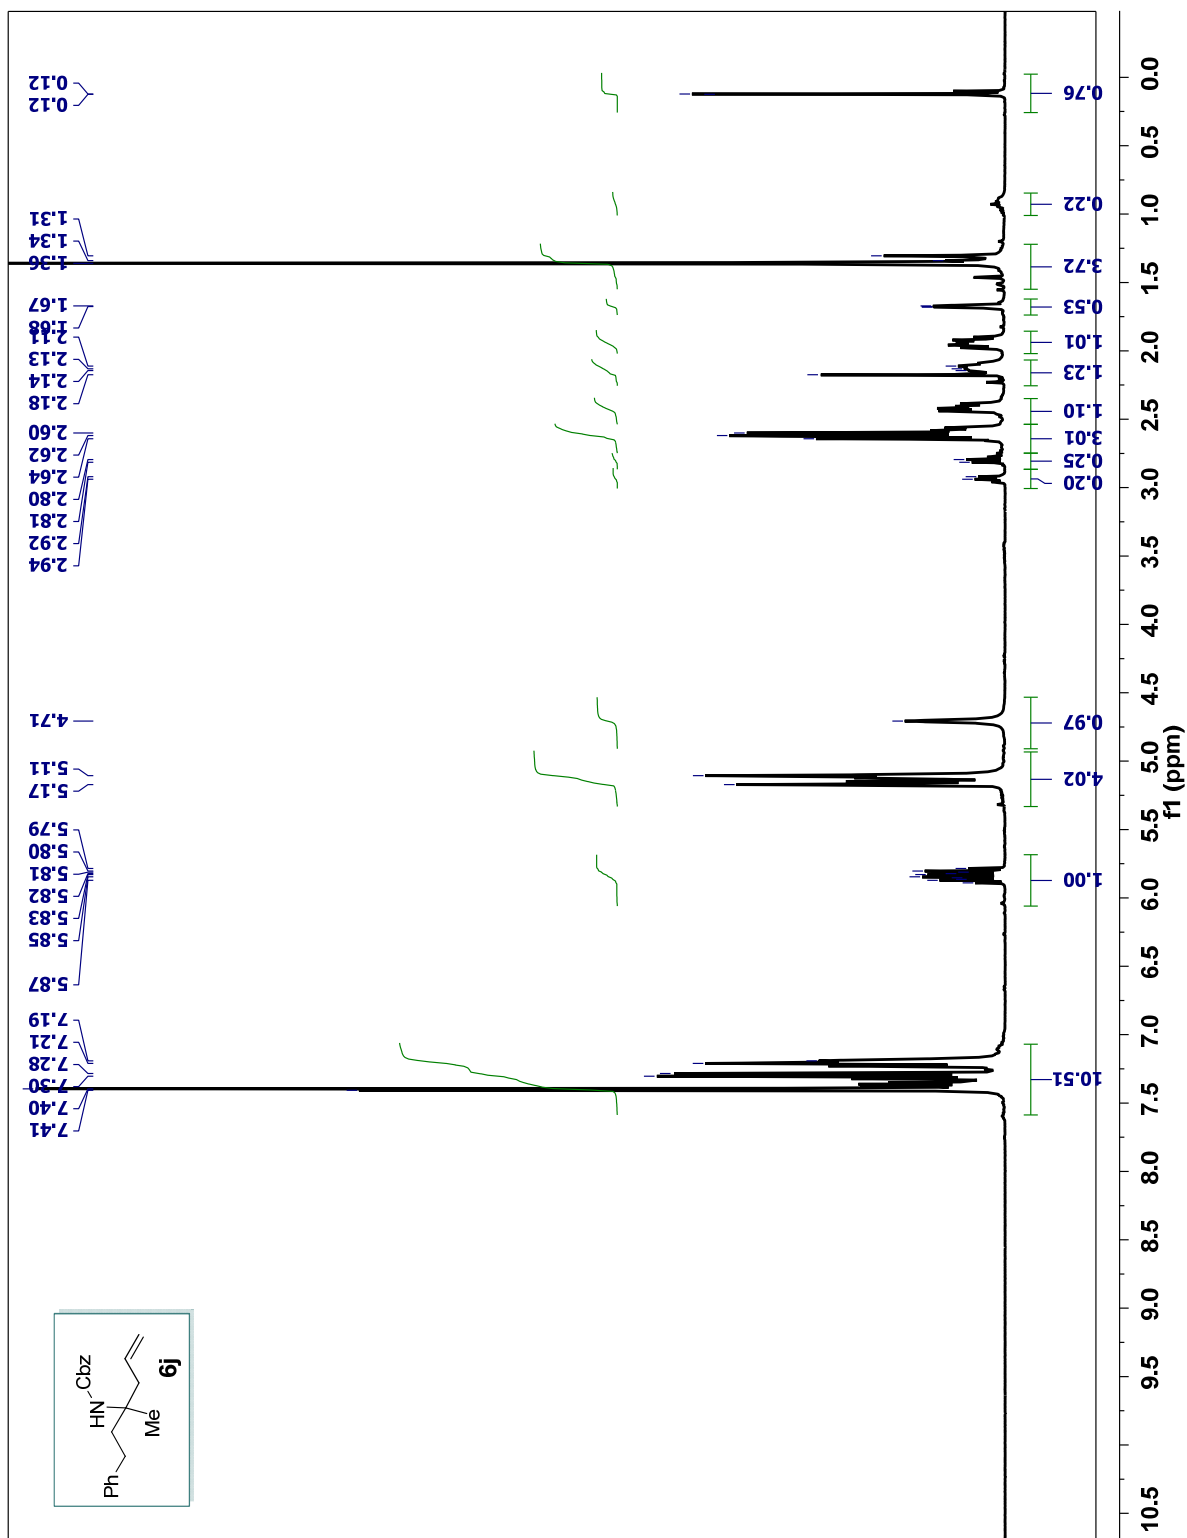

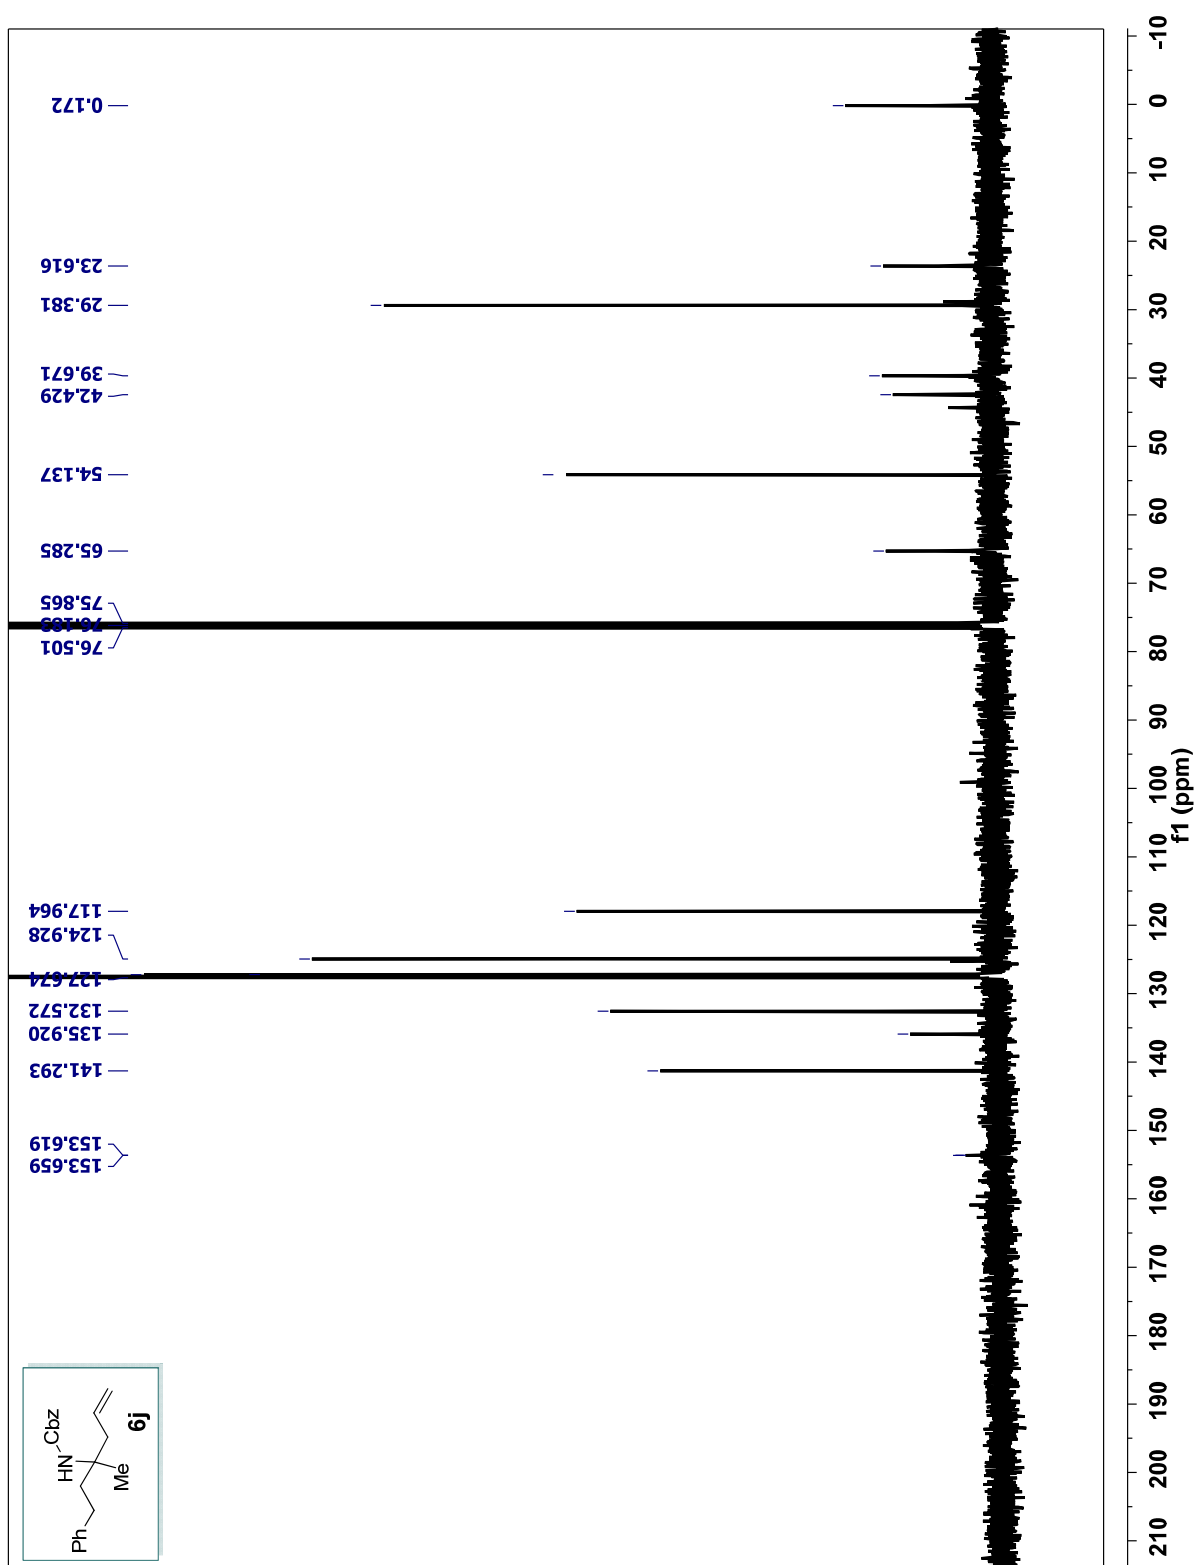

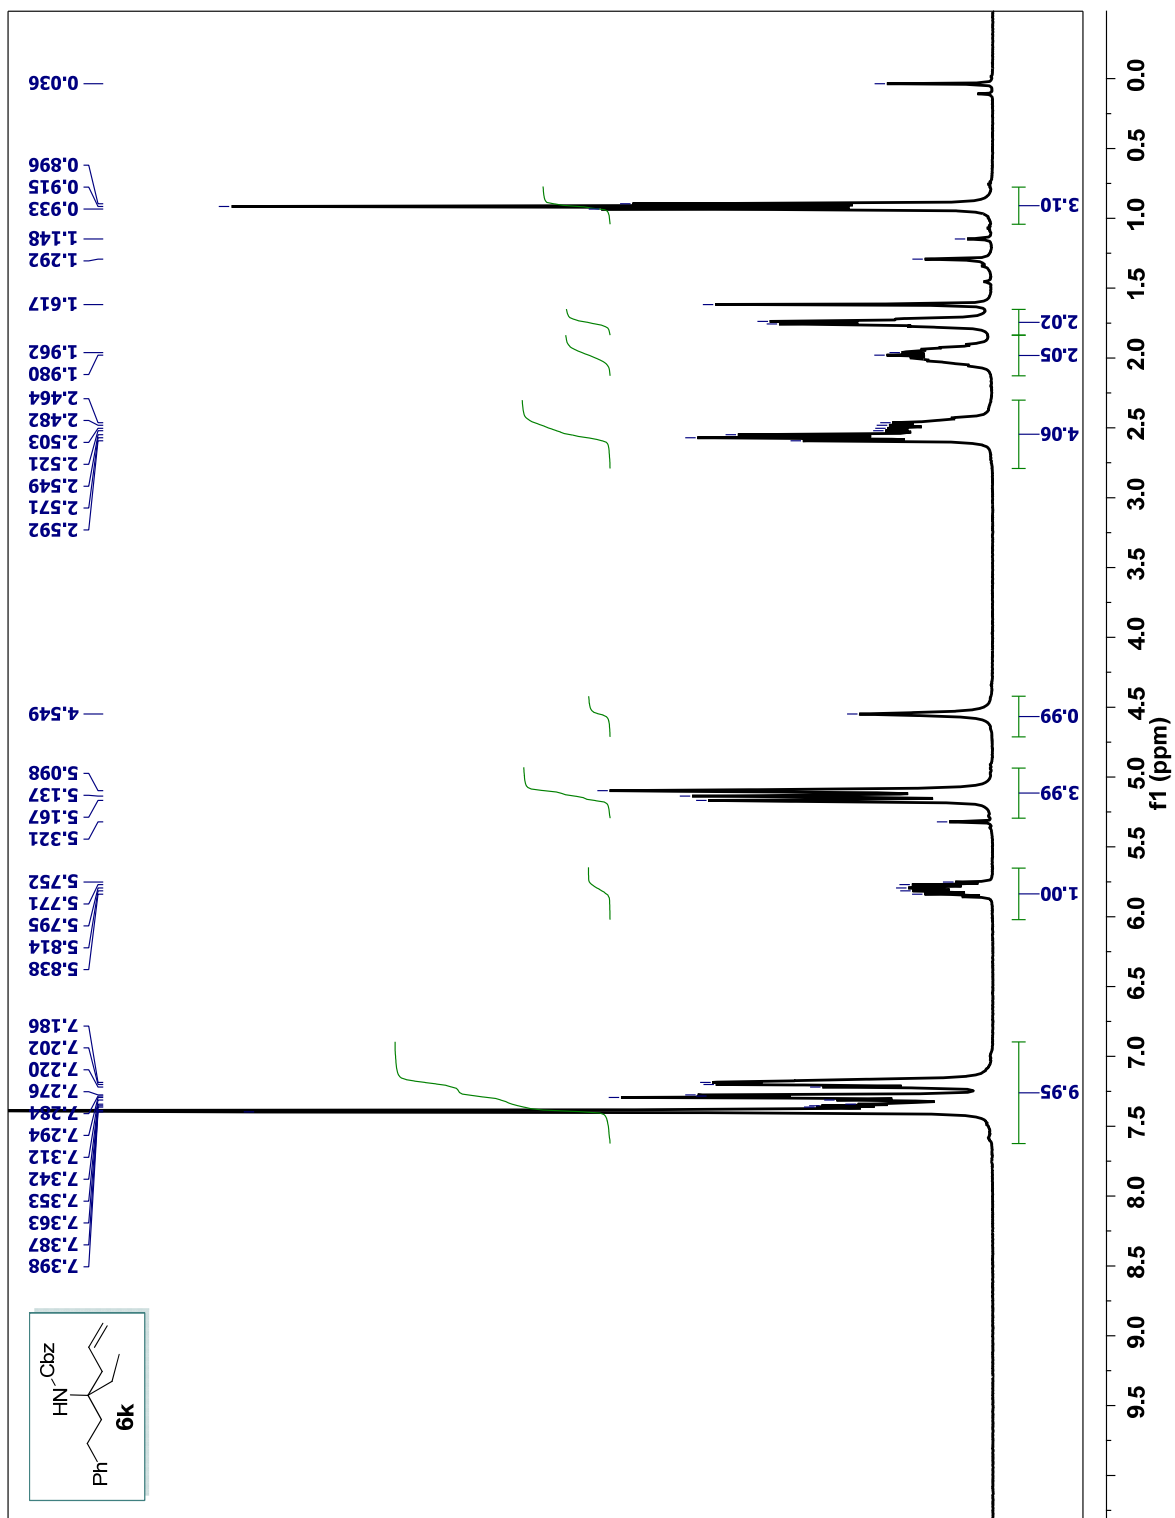

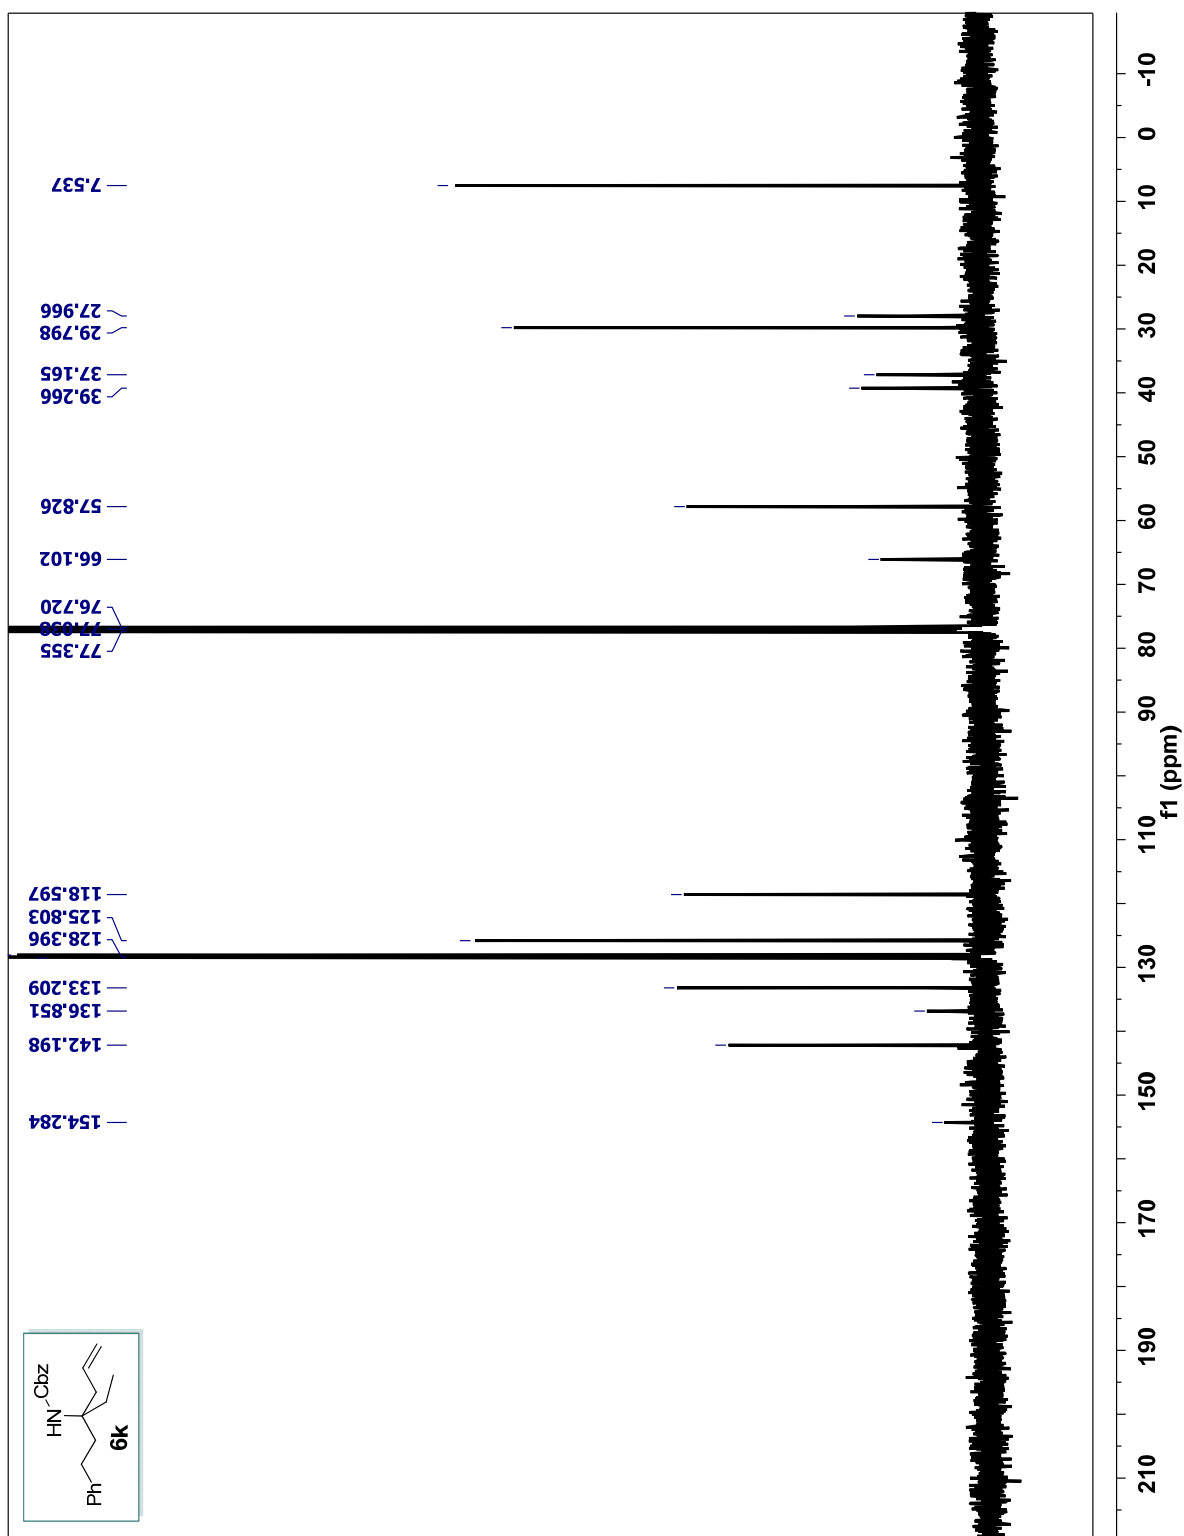

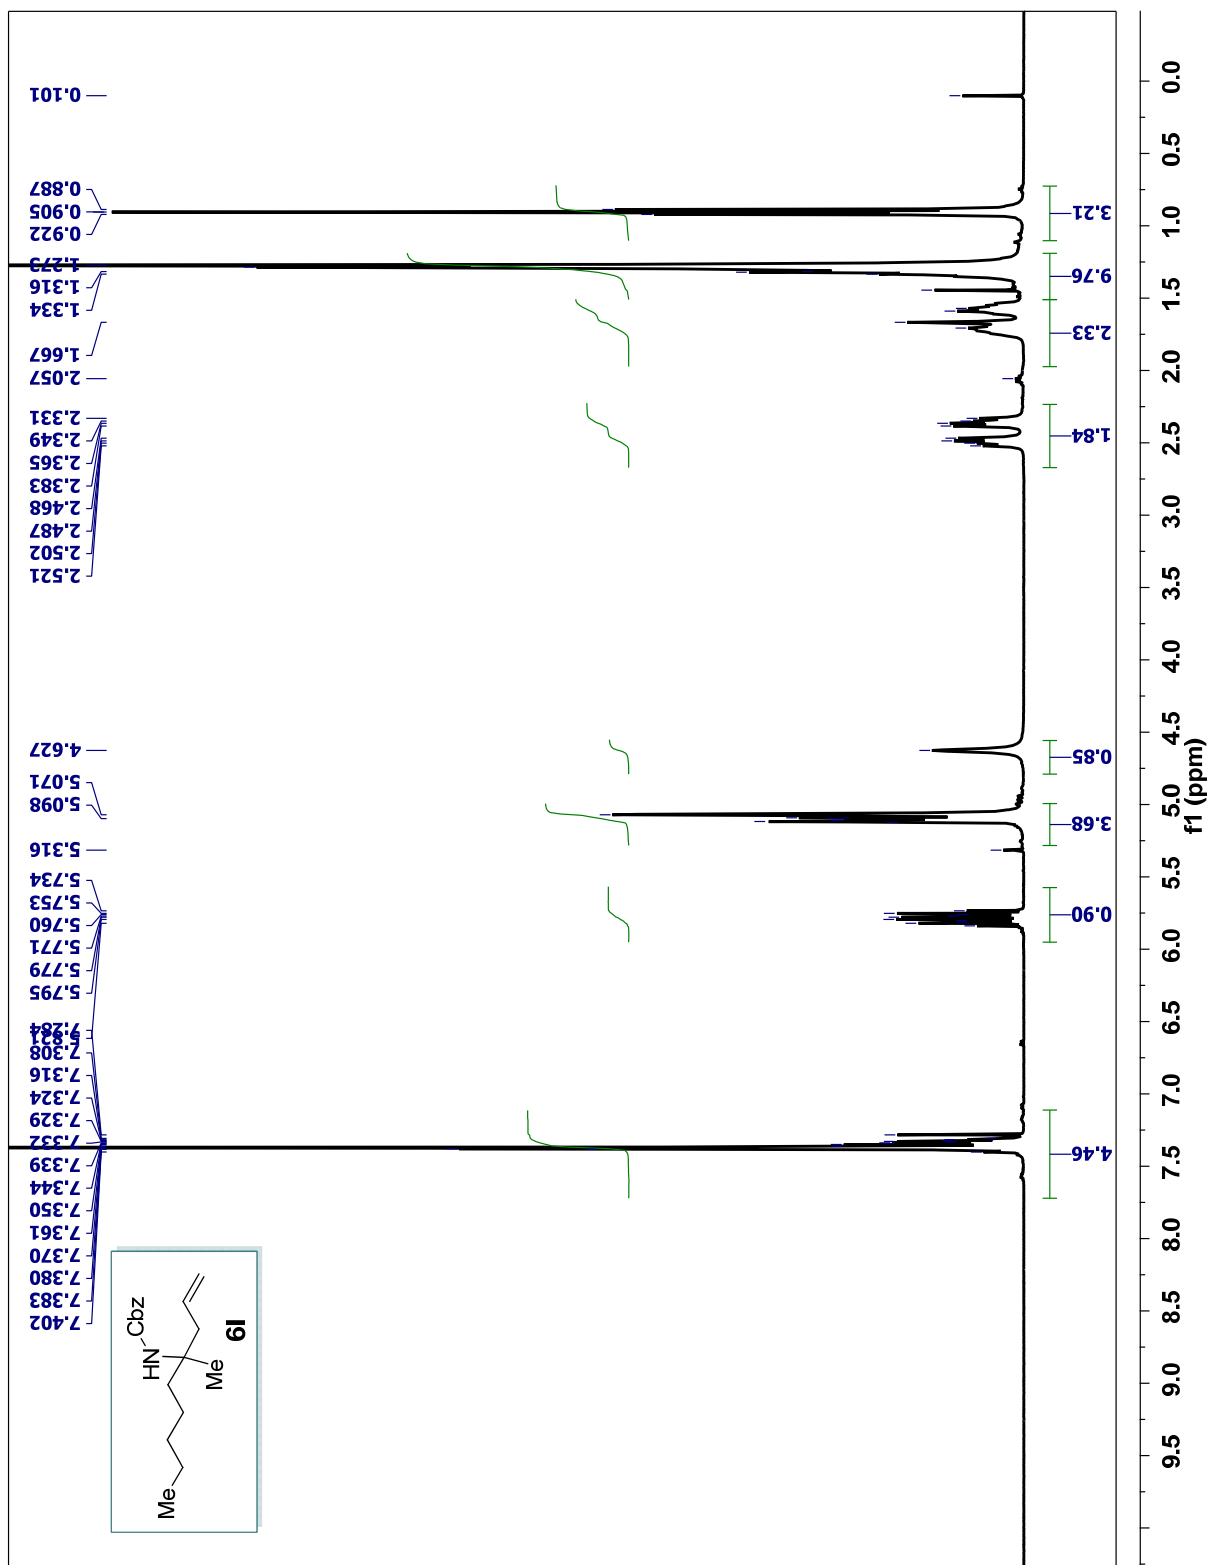

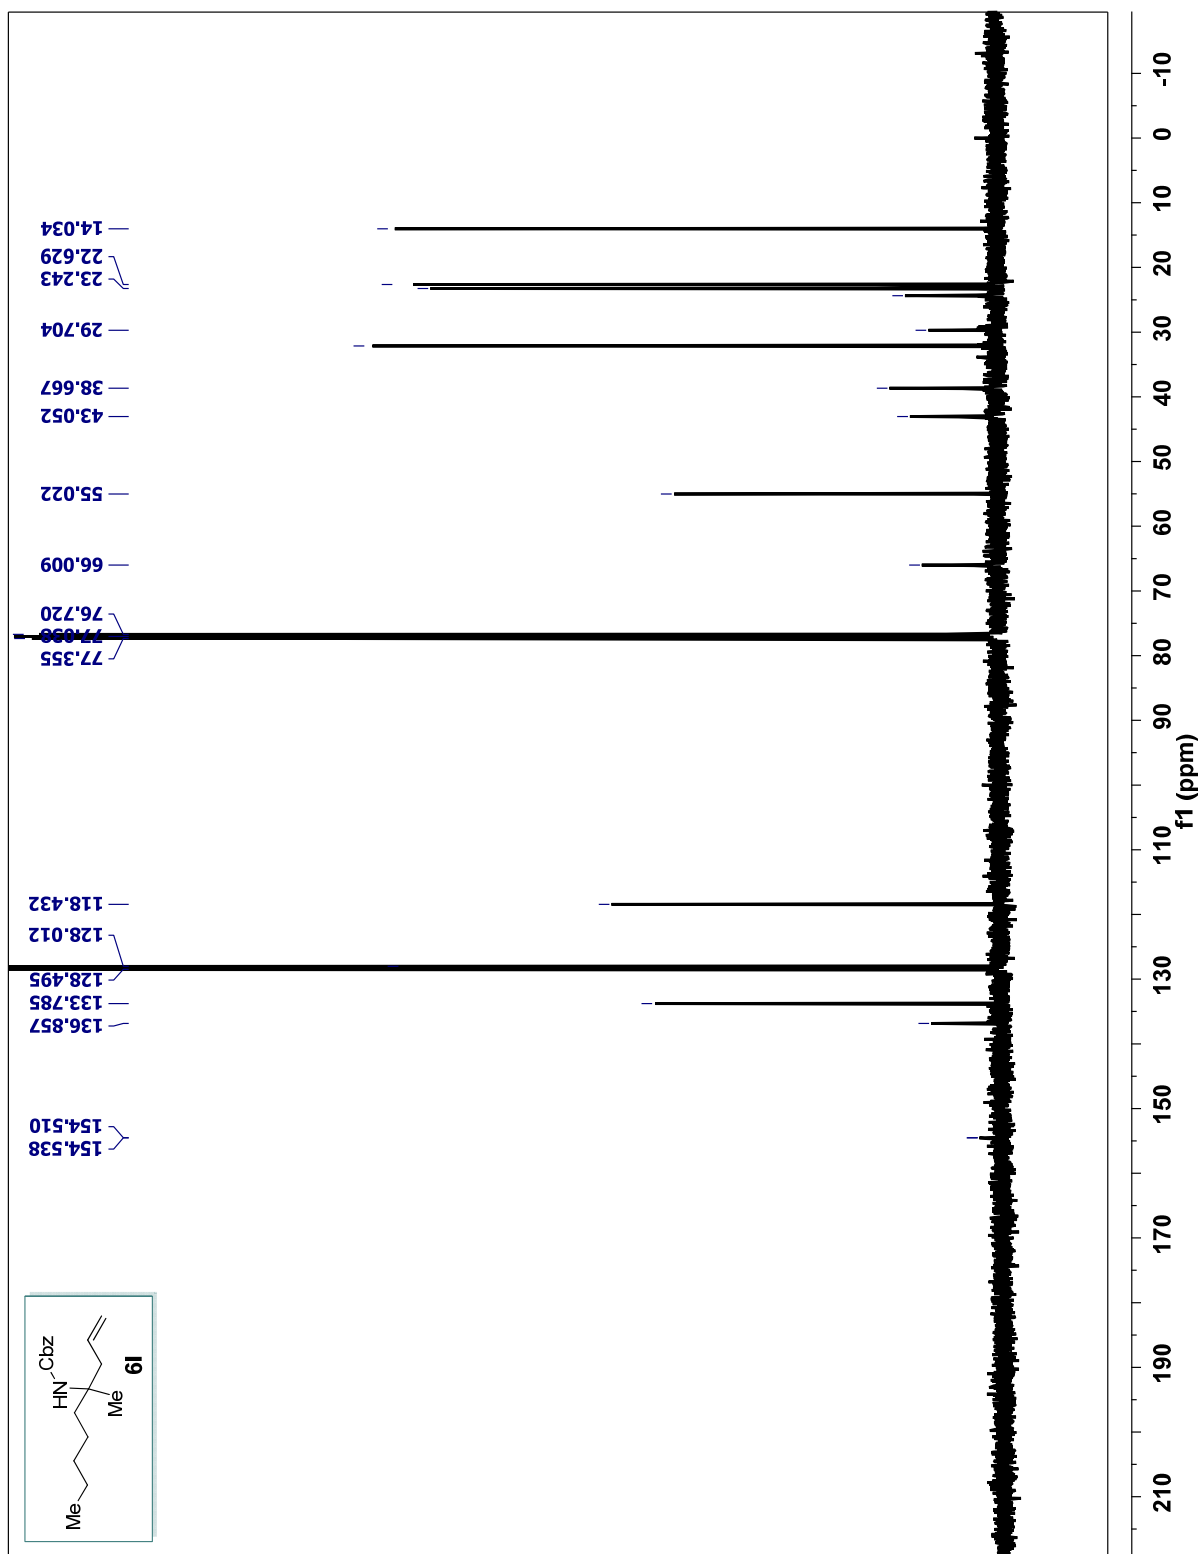

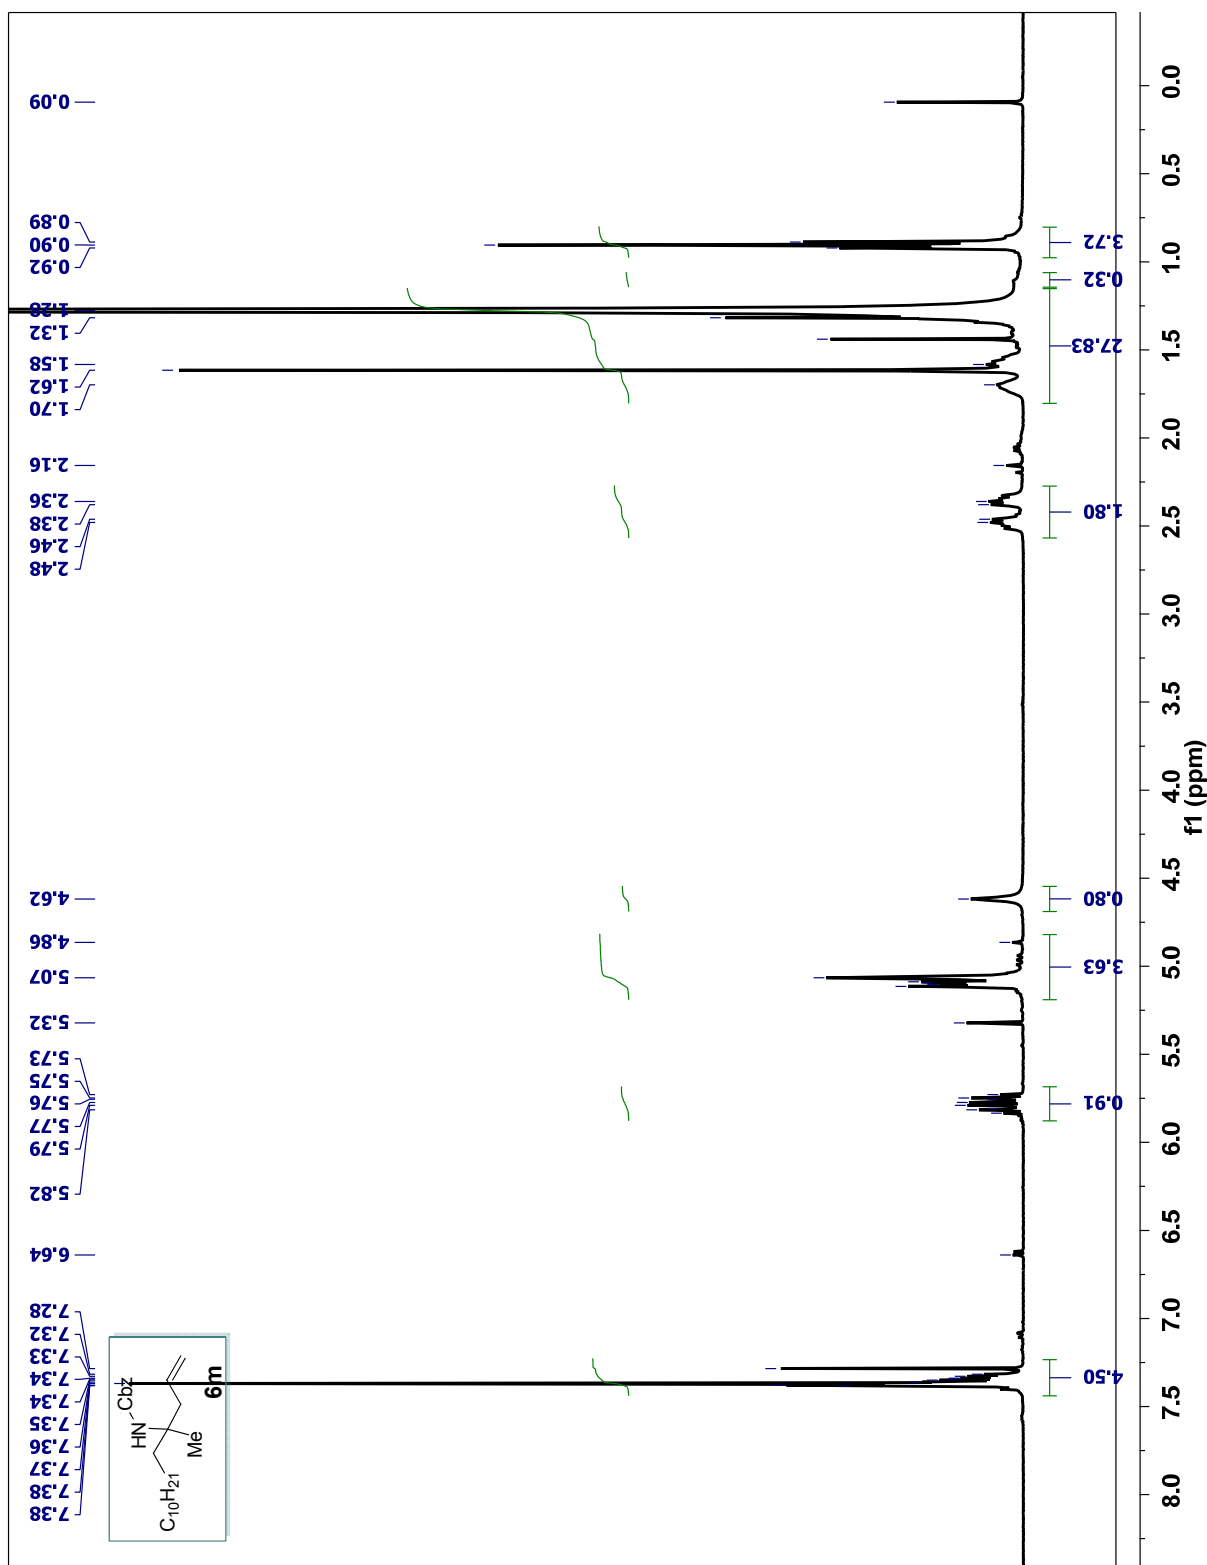

Supporting Information - II: Spectra



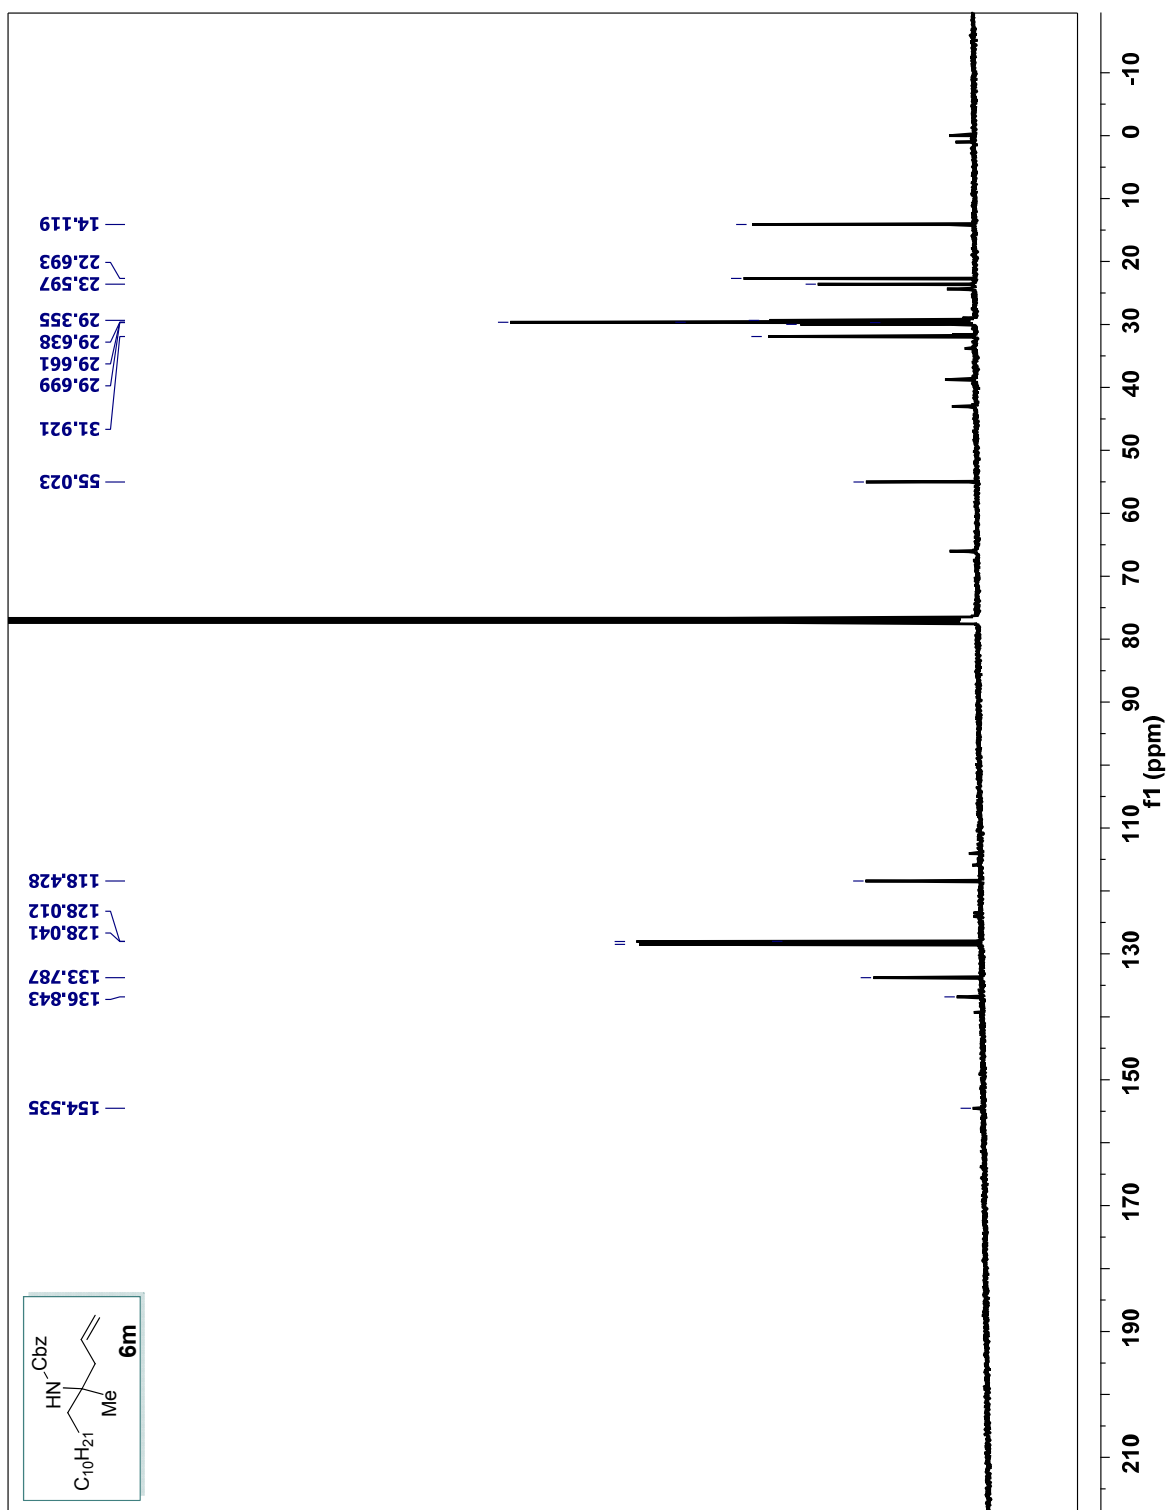

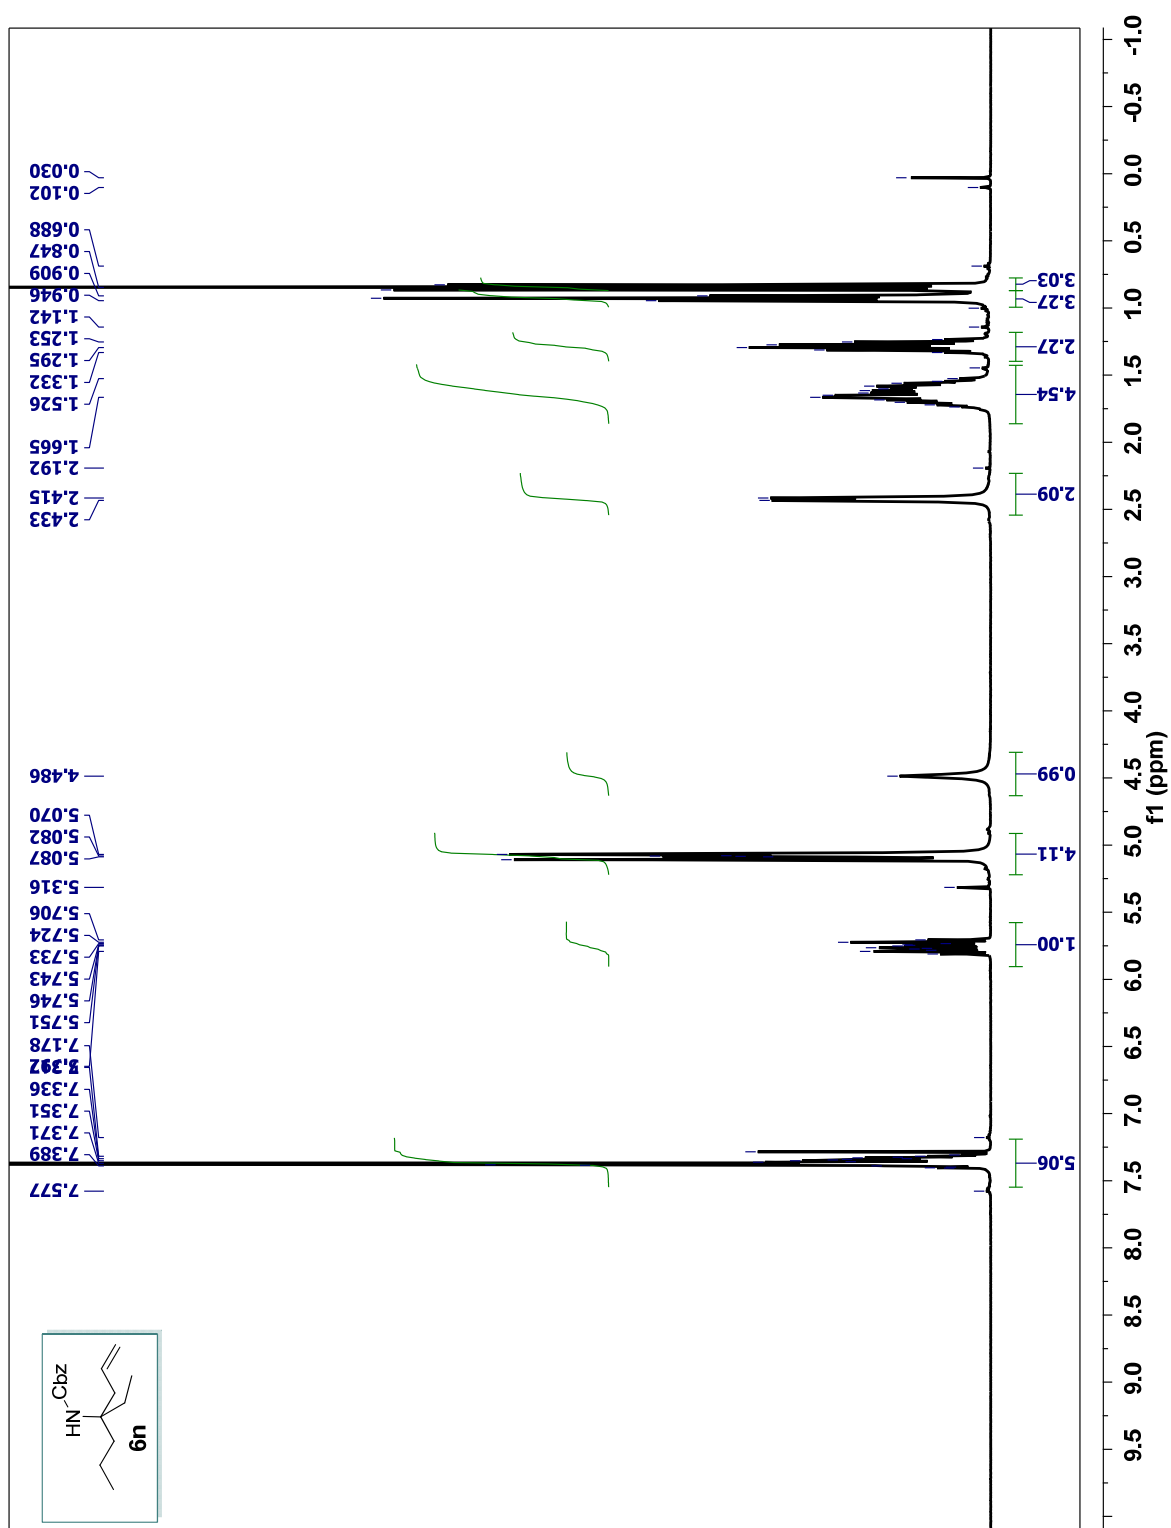

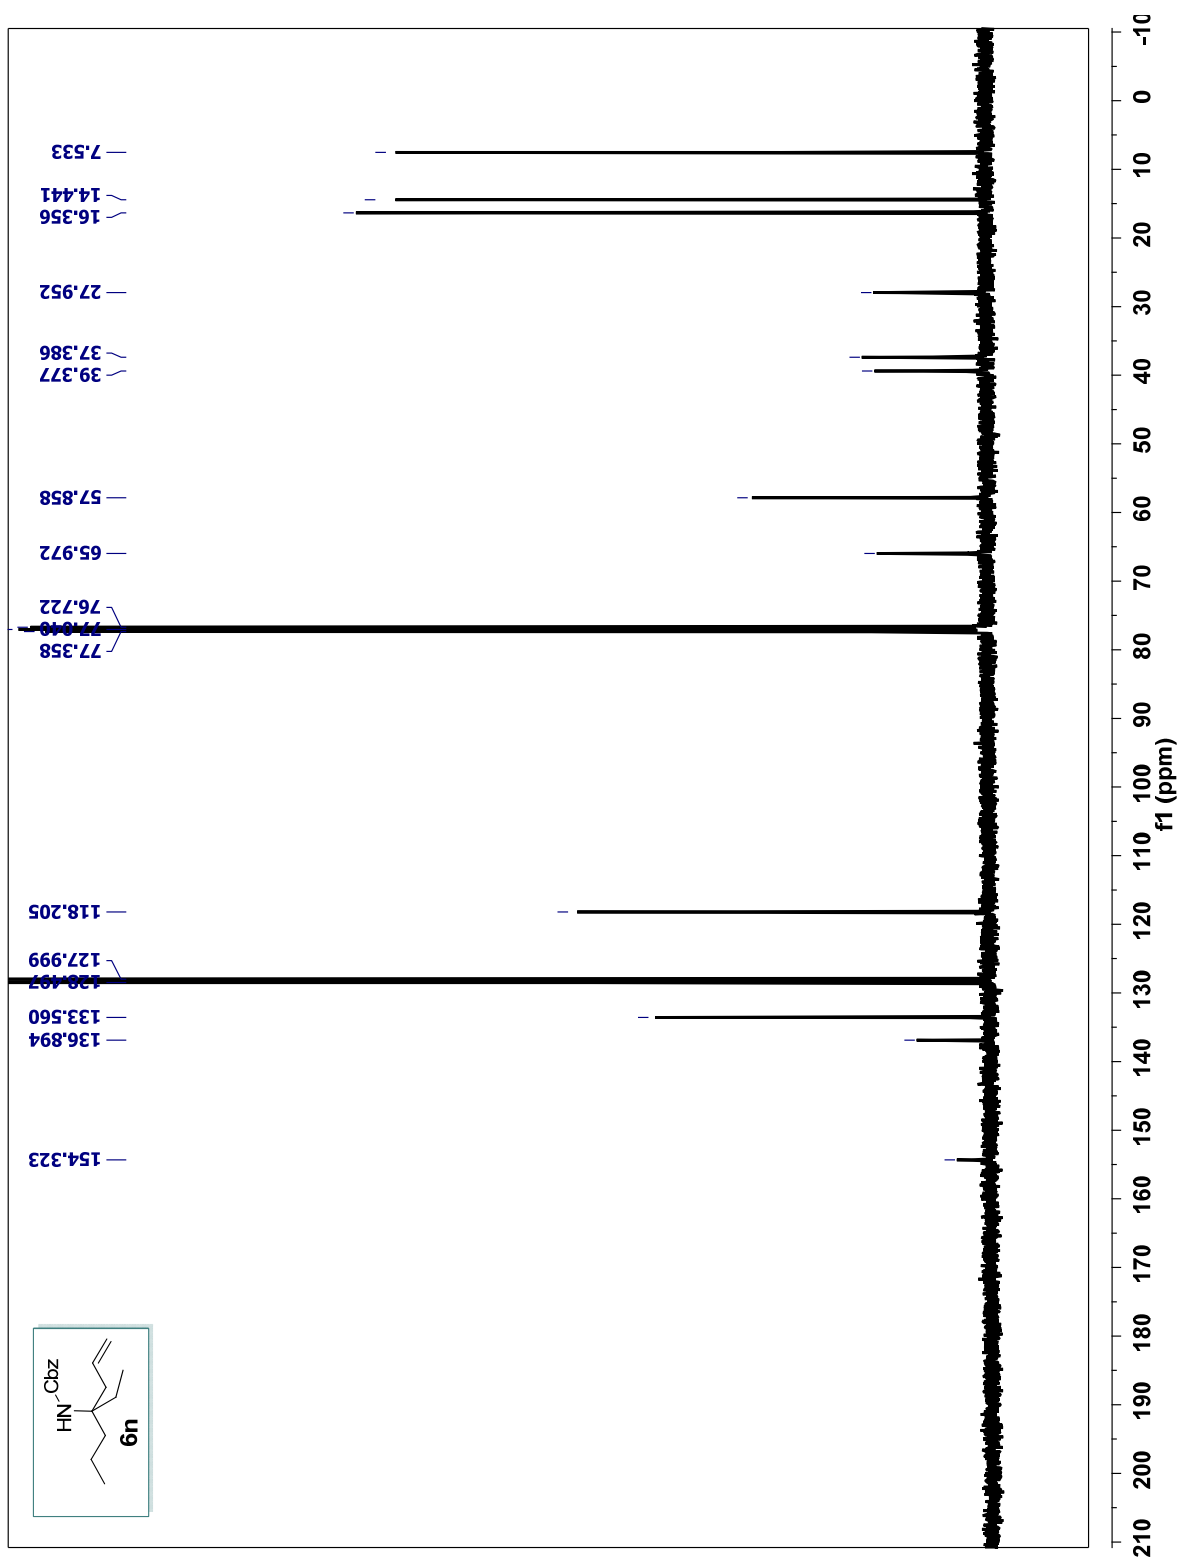

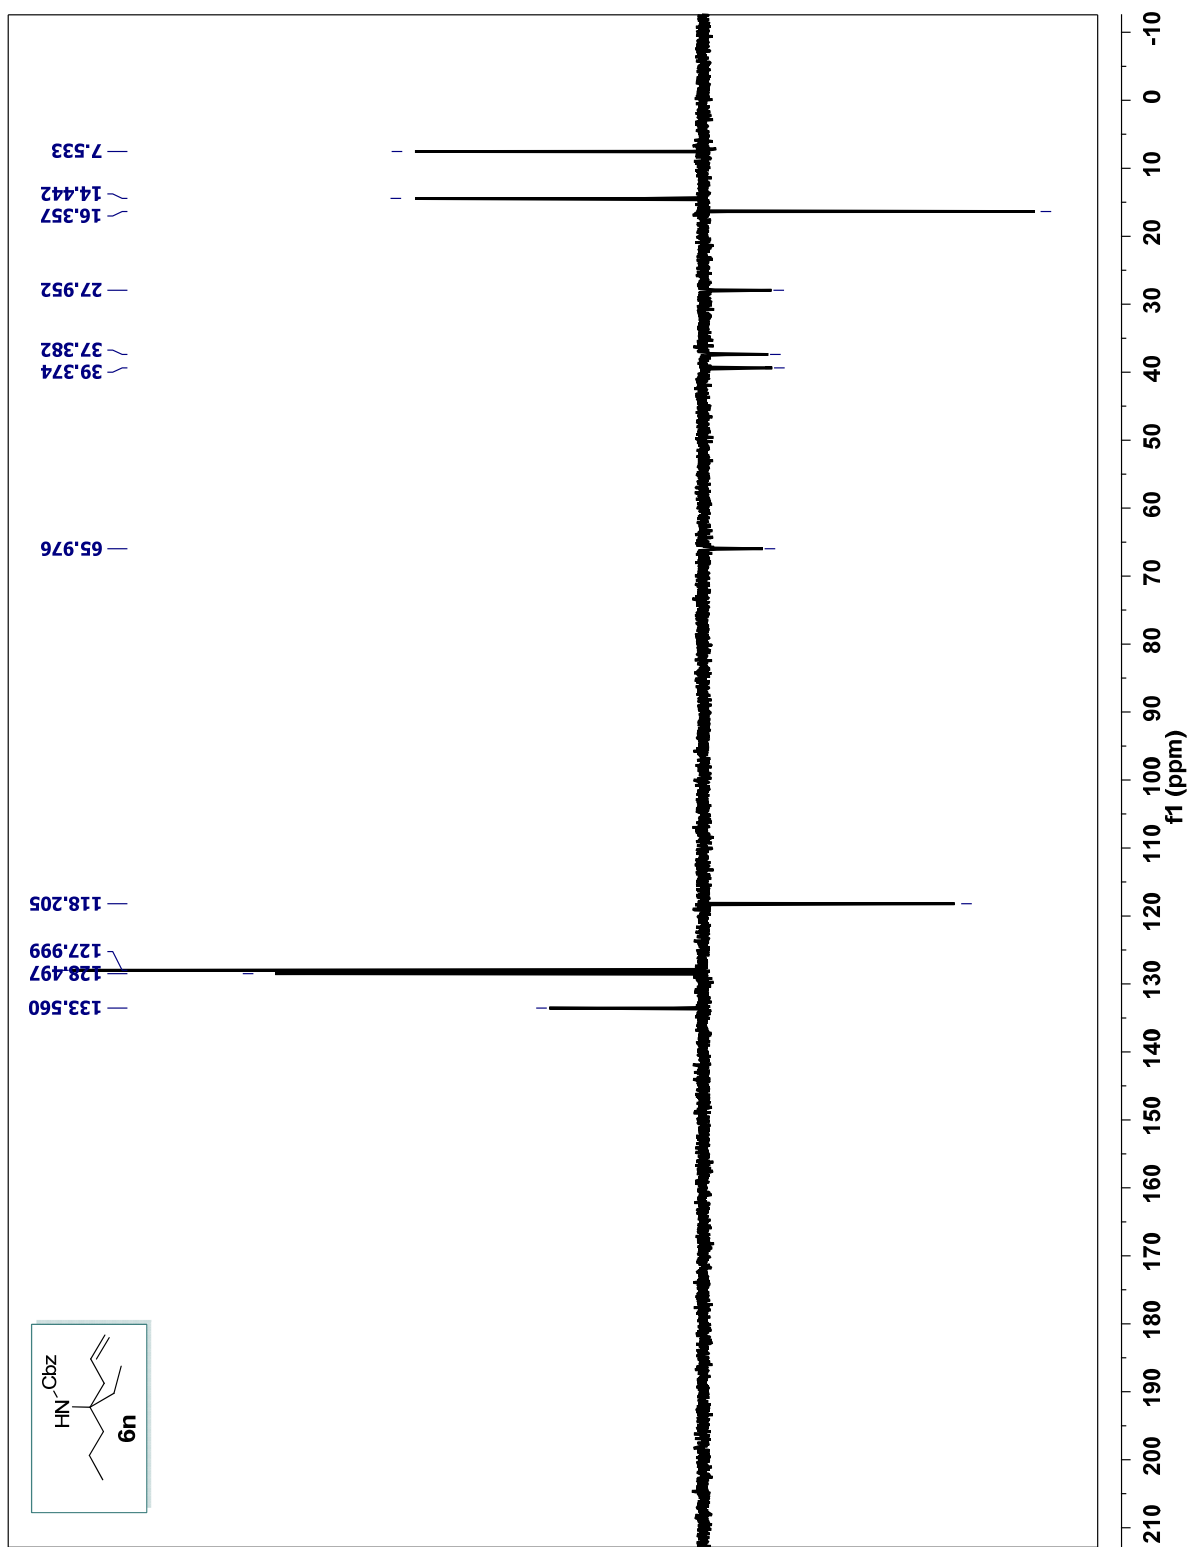

Supplement: c2cc15472b_2.pdf [file c2cc15472b_2.pdf]
