# Supplementary material for: Re2O7-catalyzed three-component synthesis of protected secondary and tertiary homoallylic amines
Source: Royal Society of Chemistry journal article supplement (doi:10.1039/c2cc15472b), 2012-01-01
Supplement: c2cc15472b.pdf [file c2cc15472b.pdf]

## Supporting Information - I: *Experimental Procedures and Characterization*

### Re<sub>2</sub>O<sub>7</sub>-Catalyzed Three-Component Synthesis of Protected Secondary and Tertiary Homoallylic Amines

Suman Pramanik and Prasanta Ghorai\*

Department of Chemistry, Indian Institute of Science Education and Research Bhopal, Bhopal-462023, India. *E-mail*: [pghorai@iiserbhopal.ac.in](mailto:pghorai@iiserbhopal.ac.in)

| Contents:                                                                  | Page: |
|----------------------------------------------------------------------------|-------|
| General Experimental Procedures                                            | 2     |
| Standard procedure for one-pot homoallylic amine synthesis                 | 2     |
| Benzyl-(1-phenylbut-3-en-1-yl)carbamate ( <b>3a</b> )                      | 2     |
| Benzyl-(1-(p-tolyl)but-3-en-1-yl)carbamate ( <b>3b</b> )                   | 3     |
| Benzyl-(1-(4-methoxyphenyl)but-3-en-1-yl)carbamate ( <b>3c</b> )           | 3     |
| Benzyl-(1-(4-chlorophenyl)but-3-en-1-yl)carbamate ( <b>3d</b> )            | 3     |
| Benzyl (1-(4-nitrophenyl)but-3-en-1-yl)carbamate ( <b>3e</b> )             | 3     |
| Benzyl (1-(4-cyanophenyl)but-3-en-1-yl)carbamate ( <b>3f</b> )             | 4     |
| Benzyl (1-(4-(trifluoromethyl)phenyl)but-3-en-1-yl)carbamate ( <b>3g</b> ) | 4     |
| Benzyl (1-(thiophen-3-yl)but-3-en-1-yl)carbamate ( <b>3h</b> )             | 4     |
| Benzyl (1-(naphthalen-1-yl)but-3-en-1-yl)carbamate ( <b>3i</b> )           | 5     |
| (E)-Benzyl (1-phenylhexa-1,5-dien-3-yl)carbamate ( <b>3j</b> )             | 5     |
| Benzyl (1-phenylhex-5-en-1-yn-3-yl)carbamate ( <b>3k</b> )                 | 5     |
| Benzyl (1-cyclohexylbut-3-en-1-yl)carbamate ( <b>3l</b> )                  | 6     |
| Benzyl (6-methylhept-1-en-4-yl)carbamate ( <b>3m</b> )                     | 6     |
| Benzyl (1-phenylpent-4-en-2-yl)carbamate ( <b>3n</b> )                     | 6     |
| Benzyl (1-phenylhex-5-en-3-yl)carbamate ( <b>3o</b> )                      | 6     |
| Ethyl (1-phenylbut-3-en-1-yl)carbamate ( <b>3p</b> )                       | 7     |
| Benzyl (1-allylcyclohexyl)carbamate ( <b>6a</b> )                          | 7     |
| Ethyl (1-allylcyclohexyl)carbamate ( <b>6b</b> )                           | 7     |
| Benzyl (1-allyl-2-methylcyclohexyl)carbamate ( <b>6c</b> )                 | 7     |
| Benzyl ((1r,4r)-1-allyl-4-methylcyclohexyl)carbamate ( <b>6d</b> ):        | 8     |
| Benzyl ((1r,4r)-1-allyl-4-hydroxycyclohexyl)carbamate ( <b>6e</b> ):       | 8     |
| Benzyl ((1r,4r)-1-allyl-4-(tert-butyl)cyclohexyl)carbamate ( <b>6f</b> )   | 9     |
| Ethyl ((1r,4r)-1-allyl-4-(tert-butyl)cyclohexyl)carbamate ( <b>6g</b> )    | 9     |
| Benzyl (1-allylcycloheptyl)carbamate ( <b>6h</b> ):                        | 9     |
| Benzyl ((1r,3r,5r,7r)-2-allyladamantan-2-yl)carbamate ( <b>6i</b> )        | 9     |
| Benzyl (3-methyl-1-phenylhex-5-en-3-yl)carbamate ( <b>6j</b> )             | 10    |
| Benzyl (3-ethyl-1-phenylhex-5-en-3-yl)carbamate ( <b>6k</b> ):             | 10    |
| Benzyl (4-methylnone-1-en-4-yl)carbamate ( <b>6l</b> )                     | 10    |
| Benzyl (4-methylpentadec-1-en-4-yl)carbamate ( <b>6m</b> )                 | 11    |
| Benzyl (4-ethylhept-1-en-4-yl)carbamate ( <b>6n</b> ):                     | 11    |
| References                                                                 | 11    |

### General Experimental Procedures:

All reagents and solvents were used as supplied commercially. Commercial  $\text{Re}_2\text{O}_7$ , ranging in color from yellow to brown-black, were stored in a desiccator over  $\text{CaCl}_2$ . Reactions were conducted in open atmosphere. Analytical thin-layer chromatography (TLC) were performed on 0.2 mm coated Science silica gel (EM 60-F254) plates purchased from Merck, Germany. Visualization was accomplished with UV light (254 nm) and exposure to either ethanolic phosphomolybdic acid (PMA), anisaldehyde or  $\text{KMnO}_4$  solution followed by heating. Melting points are uncorrected.  $^1\text{H}$  NMR spectra were acquired on a Bruker AVANCE (at 400 MHz) and chemical shifts are reported relative to the residual solvent peak.  $^{13}\text{C}$  NMR spectra were acquired on a Bruker AVANCE (at 100 MHz) and chemical shifts are reported in ppm relative to the residual solvent peak. Unless noted, NMR spectra were acquired in  $\text{CDCl}_3$ ; individual peaks are reported as: multiplicity, integration, coupling constant in Hz. All IR spectra were obtained as neat films with a Perkin-Elmer Model Spectrum BX FT-IR and selected absorbances are reported in  $\text{cm}^{-1}$ . Low resolution (LR) and High-resolution (HR) mass spectrometry data were acquired by the Central Instrumentation Facility (CIF), Indian Institute of Science Education and Research Bhopal on a Bruker Daltonics MicroTOF-Q-II Mass Spectrometer using  $\text{CH}_3\text{CN}/\text{H}_2\text{O}$  as solvent.

**Standard procedure for one-pot homoallylic amine synthesis:** To a stirred solution of carbonyl (1.00 mmol) and carbamate (1.20 or 1.50 mmol) in acetonitrile (4.0 ml) at rt allyl trimethyl silane (1.50 or 2.00 mmol) was added followed by the addition of  $\text{Re}_2\text{O}_7$  (1.5 or 2.5 mol%). After stirring for given time on *Table 2, 3, or 4*, the reaction mixture was passed through a plug of silica. The solvent was removed under vacuum and the crude was purified by flash column chromatography (EtOAc/Hexane) on silica gel.

**Benzyl-(1-phenylbut-3-en-1-yl)carbamate (3a):**<sup>1-3</sup> 90% yield;  $R_f = 0.32$  (10:90 = EtOAc/Hexane); Colorless solid; mp. 62-64°C; IR (neat): 3325, 3065, 3032, 1715, 1519, 1250, 1027, 917, 752, 698  $\text{cm}^{-1}$ ;  $^1\text{H}$  NMR (400 MHz,  $\text{CDCl}_3$ ): 7.50–7.17 (10H), 5.80-5.62 (m, 1H), 5.25-5.05 (5H), 4.85 (s br, 1H), 2.57 (s, 2H);  $^{13}\text{C}$  NMR (100 MHz,  $\text{CDCl}_3$ ): 155.7 (C=O), 141.9 (C), 136.5 (C), 133.7 (CH=CH<sub>2</sub>), 128.6, 128.5,

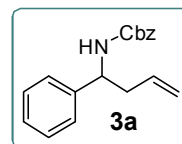

128.2, 127.3, 126.3 ( $\text{CH}^{\text{Ar}}$ ), 118.5 ( $\text{CH}=\text{CH}_2$ ), 66.8 ( $\text{OCH}_2$ ), 54.5 (allyl- $\text{CH}$ ), 41.0 (vinyl- $\text{CH}_2$ ); LRMS (ESI,  $m/z$ ):  $[\text{M} + \text{Na}]^+$  calculated for  $\text{C}_{18}\text{H}_{19}\text{NNaO}_2$ : 304.1; found; 304.1.

**Benzyl(1-(p-tolyl)but-3-en-1-yl)carbamate (3b):**<sup>4</sup> 90% yield;  $R_f = 0.31$

(10:90 = EtOAc/Hexane); Colorless solid; mp. 66-67°C; IR (neat): 3335, 3032, 2922, 1697, 1515, 1250, 1042, 917, 733  $\text{cm}^{-1}$ ;  $^1\text{H}$  NMR (400 MHz,  $\text{CDCl}_3$ ): 7.45-7.20 (5H), 7.19-7.05 (4H), 5.75-5.55 (1H), 5.20-4.95 (5H),

4.80-4.60 (1H), 2.49 (s, 2H), 2.29 (s, 3H);  $^{13}\text{C}$  NMR (100 MHz,  $\text{CDCl}_3$ ): 155.6 (q  $\text{C}=\text{O}$ ), 138.9, 136.9, 136.5 (C), 133.9 ( $\text{CH}=\text{CH}_2$ ), 129.2, 128.5, 128.1, 126.2 ( $\text{CH}^{\text{Ar}}$ ), 118.3 ( $\text{CH}=\text{CH}_2$ ), 66.7 ( $\text{OCH}_2$ ), 54.3 (allyl- $\text{CH}$ ), 41.0 (vinyl- $\text{CH}_2$ ), 21.0 ( $\text{CH}_3$ ); LRMS (ESI,  $m/z$ ):  $[\text{M} + \text{Na}]^+$  calculated for  $\text{C}_{19}\text{H}_{21}\text{NNaO}_2$ , 318.1; found, 318.1.

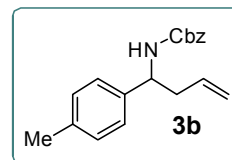

**Benzyl(1-(4-methoxyphenyl)but-3-en-1-yl)carbamate (3c):**<sup>1-3</sup> 82%

yield;  $R_f = 0.22$  (10:90 = EtOAc/Hexane); Colorless solid; mp. 68-69°C; IR (neat): 3317, 2953, 1694, 1513, 1245, 1033, 919  $\text{cm}^{-1}$ ;  $^1\text{H}$  NMR (400 MHz,  $\text{CDCl}_3$ ): 7.55-7.30 (5H), 7.20 (d,  $J = 8$  Hz, 2H), 6.90 (d,  $J = 8$  Hz,

2H), 5.70 (m,  $J = 8$  Hz, 1H), 5.24-5.02 (5H), 4.78 (br, 1H), 3.82 (s, 3H), 2.56 (s, 2H);  $^{13}\text{C}$  NMR (100 MHz,  $\text{CDCl}_3$ ): 158.8 (C-OMe), 155.7 (C=O), 136.5 (C), 133.9 ( $\text{CH}=\text{CH}_2$ ), 128.5, 128.1, 127.4 ( $\text{CH}^{\text{Ar}}$ ), 118.3 ( $\text{CH}=\text{CH}_2$ ), 114 (CH), 66.7 ( $\text{OCH}_2$ ), 55.3 ( $\text{CH}_3\text{O}$ ), 54.0 (allyl- $\text{CH}$ ), 41.0 (vinyl- $\text{CH}_2$ ); LRMS (ESI,  $m/z$ ):  $[\text{M} + \text{Na}]^+$  calculated for  $\text{C}_{19}\text{H}_{21}\text{NNaO}_3$ , 334.1; found: 334.1.

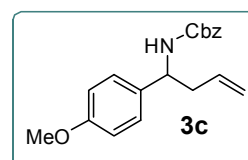

**Benzyl(1-(4-chlorophenyl)but-3-en-1-yl)carbamate (3d):**<sup>2,3</sup> 81% yield;

$R_f = 0.32$  (10:90 = EtOAc/Hexane); Colorless solid; mp. 65-66°C; IR (neat): 3343, 3034, 1693, 1520, 1250, 1038, 823  $\text{cm}^{-1}$ ;  $^1\text{H}$  NMR (400 MHz,

$\text{CDCl}_3$ ): 7.55-7.05 (9H), 5.66 (m,  $J = 8$  Hz, 1H), 5.25-4.95 (5H), 4.90-4.60 (s, 1H), 2.53 (s, 2H);  $^{13}\text{C}$  NMR (100 MHz,  $\text{CDCl}_3$ ): 155.5 (C=O), 140.5 (C), 136.2 (C), 133.2 ( $\text{CH}=\text{CH}_2$ ), 132.9 (q C), 128.5, 128.1, 127.5 (CH), 118.8 ( $\text{CH}_2$ ), 66.8 ( $\text{OCH}_2$ ), 53.9 (allyl- $\text{CH}$ ), 40.8 (vinyl- $\text{CH}_2$ ); LRMS (ESI,  $m/z$ ):  $[\text{M} + \text{Na}]^+$  calculated for  $\text{C}_{18}\text{H}_{18}\text{ClNNaO}_2$ , 338.0; found: 338.0.

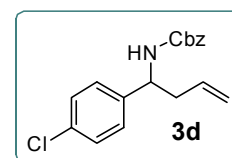

**Benzyl(1-(4-nitrophenyl)but-3-en-1-yl)carbamate (3e):**<sup>1,2</sup> 63% yield;  $R_f = 0.16$  (10:90 = EtOAc/Hexane); Colorless solid; mp. 87-88°C; IR (neat):

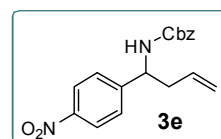

3324, 3032, 1693, 1519, 1347, 1257, 1041, 854  $\text{cm}^{-1}$ ;  $^1\text{H}$  NMR (400 MHz,  $\text{CDCl}_3$ ): 8.21 (d,  $J = 8$  Hz, 2H), 7.55-7.15 (7H), 5.75-5.55 (1H), 5.27 (s, 1H), 5.26- 5.01 (4H), 4.89 (br s, 1H) 2.56 (2H);  $^{13}\text{C}$  NMR (100 MHz,  $\text{CDCl}_3$ ): 155.6 (C=O), 149.7 (C), 147.2 ( $\text{NO}_2\text{-C}$ ), 136.1 (C), 132.5 ( $\text{CH}=\text{CH}_2$ ), 128.6, 128.3, 128.2, 127.1, 123.9 ( $\text{CH}^{\text{Ar}}$ ), 119.7 ( $\text{CH}=\text{CH}_2$ ), 67.1 ( $\text{OCH}_2$ ), 54.1 (allyl-CH), 40.7 (vinyl- $\text{CH}_2$ ); LRMS (ESI,  $m/z$ ):  $[\text{M} + \text{Na}]^+$  calculated for  $\text{C}_{18}\text{H}_{18}\text{N}_2\text{NaO}_4$ , 349.1; found; 349.1.

**Benzyl (1-(4-cyanophenyl)but-3-en-1-yl)carbamate (3f):**<sup>3</sup> 64% yield;  $R_f$

= 0.34 (20:80 = EtOAc/Hexane); Colorless oil; IR (neat): 3343, 3067, 2228,

1713, 1519, 1250, 1042, 921, 836, 739  $\text{cm}^{-1}$ ;  $^1\text{H}$  NMR (400 MHz,  $\text{CDCl}_3$ ):

7.64 (d,  $J = 8$  Hz, 2H), 7.50-7.21 (7H), 5.73-5.53 (1H), 5.33-5.00 (5H), 4.85

(br s, 1H), 2.56 (br s, 2H);  $^{13}\text{C}$  NMR (100 MHz,  $\text{CDCl}_3$ ): 155.6 (C=O), 147.7 (C), 136.1 (C),

132.6 ( $\text{CH}=\text{CH}_2$ ), 132.4, 128.5, 128.3, 127.0 ( $\text{CH}^{\text{Ar}}$ ), 119.5 (CN), 118.7 ( $\text{CH}=\text{CH}_2$ ), 111.2 (NC-

C), 67.1 ( $\text{OCH}_2$ ), 54.3 (ally-CH), 40.7 (vinyl- $\text{CH}_2$ ); LRMS (ESI,  $m/z$ ):  $[\text{M} + \text{Na}]^+$  calculated for

$\text{C}_{19}\text{H}_{18}\text{N}_2\text{NaO}_2$ , 329.1; found: 329.1.

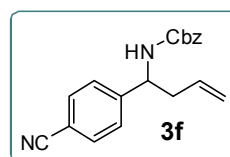

**Benzyl (1-(4-(trifluoromethyl)phenyl)but-3-en-1-yl)carbamate (3g):**<sup>3</sup>

87% yield;  $R_f = 0.37$  (10:90 = EtOAc/Hexane); Colorless solid; mp. 69-

70°C; IR (neat): 3334, 2945, 1681, 1530, 1331, 1260, 1116, 921, 834  $\text{cm}^{-1}$ ;

$^1\text{H}$  NMR (400 MHz,  $\text{CDCl}_3$ ): 7.61 (d,  $J = 8$  Hz, 2H), 7.48-6.80 (7H), 5.80-

5.56 (1H), 5.34-5.02 (5H), 4.88 (s br, 1H), 2.55 (s br, 2H);  $^{13}\text{C}$  NMR (100 MHz,  $\text{CDCl}_3$ ): 155.6

(C=O), 146.2 (C), 136.2 (C), 132.9 ( $\text{CH}=\text{CH}_2$ ), 130.0, 129.7, 129.4, 129.0, (quartet,  $\text{CF}_3$ ) 128.5,

128.4, 128.3, 126.5 ( $\text{CH}^{\text{Ar}}$ ), 125.63, 125.59, 125.55, 125.51, 125.4 ( $\text{CF}_3\text{-C}$ ), 122.7 ( $\text{CH}^{\text{Ar}}$ ), 119.2

( $\text{CH}=\text{CH}_2$ ), 67.0 ( $\text{OCH}_2$ ), 54.1 (allyl-CH), 40.9 (vinyl- $\text{CH}_2$ ); LRMS (ESI,  $m/z$ ):  $[\text{M} + \text{Na}]^+$

calculated for  $\text{C}_{19}\text{H}_{18}\text{F}_3\text{NNaO}_2$ , 372.1; found: 372.1.

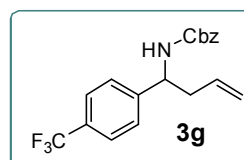

**Benzyl (1-(thiophen-3-yl)but-3-en-1-yl)carbamate (3h):** 92% yield;  $R_f = 0.25$

(10:90 = EtOAc/Hexane); Colorless solid; mp. 45-46°C; IR (neat): 3324, 3068,

1702, 1527, 1328, 1250, 1042, 917, 785  $\text{cm}^{-1}$ ;  $^1\text{H}$  NMR (400 MHz,  $\text{CDCl}_3$ ):

7.50-7.25 (6H), 7.13 (s, 1H), 7.03 (d,  $J = 4$  Hz, 1H), 5.84-5.64 (m, 1H), 5.28-4.72 (6H), 2.61

(2H);  $^{13}\text{C}$  NMR (100 MHz,  $\text{CDCl}_3$ ): 155.7 (C=O), 143.0 (C), 136.5 (C), 133.7 ( $\text{CH}=\text{CH}_2$ ), 128.5,

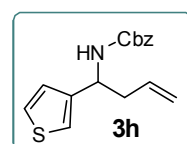

128.2, 126.2, 126.1, 120.9 ( $\text{CH}^{\text{Ar}}$ ), 118.5 ( $\text{CH}=\text{CH}_2$ ), 66.8 ( $\text{OCH}_2$ ), 50.5 (allyl- $\text{CH}$ ), 40.3 (vinyl- $\text{CH}_2$ ); HRMS (ESI,  $m/z$ ):  $[\text{M} + \text{Na}]^+$  calculated for  $\text{C}_{16}\text{H}_{17}\text{NNaO}_2\text{S}$ , 310.0872; found: 310.0879.

**Benzyl (1-(naphthalen-1-yl)but-3-en-1-yl)carbamate (3i):** 93% yield;  $R_f$  = 0.30 (10:90 = EtOAc/Hexane); Colorless solid; mp. 111-113°C; IR (neat): 3328, 3065, 1702, 1510, 1250, 1027, 917, 777  $\text{cm}^{-1}$ ;  $^1\text{H}$  NMR (400 MHz,  $\text{CDCl}_3$ ): 8.17 (s, 1H), 7.91 (d,  $J = 8$  Hz, 1H), 7.82 (1H), 7.65-7.25 (9H), 5.90-5.55 (2H), 5.40-5.85 (5H), 2.90-2.55 (2H);  $^{13}\text{C}$  NMR (100

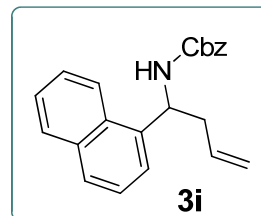

MHz,  $\text{CDCl}_3$ ): 155.7 ( $\text{C}=\text{O}$ ), 137.4 (C), 136.5 (C), 134.0 ( $\text{CH}=\text{CH}_2$ ), 130.8 (C), 128.9, 128.5, 128.1, 126.4, 125.7, 125.2 ( $\text{CH}^{\text{Ar}}$ ), 123.0 (C), 122.7 ( $\text{CH}^{\text{Ar}}$ ), 118.4 ( $\text{CH}=\text{CH}_2$ ), 66.8 ( $\text{OCH}_2$ ), 50.4 (allyl- $\text{CH}$ ), 40.2 (vinyl- $\text{CH}_2$ ); HRMS (ESI,  $m/z$ ):  $[\text{M} + \text{Na}]^+$  calculated for  $\text{C}_{22}\text{H}_{21}\text{NNaO}_2$ , 354.1470; found: 354.1495.

**(E)-Benzyl (1-phenylhexa-1,5-dien-3-yl)carbamate (3j):**<sup>2</sup> 85% yield;  $R_f$  = 0.33 (10:90 = EtOAc/Hexane); Colorless solid; mp. 73-75°C; IR (neat): 3326, 3063, 1713, 1519, 1236, 1027, 966, 917, 749  $\text{cm}^{-1}$ ;  $^1\text{H}$  NMR (400 MHz,

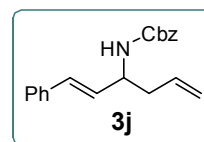

$\text{CDCl}_3$ ): 7.55-7.10 (10H), 6.56 (d,  $J = 16$  Hz, 1H), 6.17 (dd,  $J = 8$  Hz, 16 Hz, 1H), 5.91-5.75 (1H), 5.26-5.08 (4H), 4.92 (s, 1H), 4.51 (s, 1H), 2.25 (s, 2H);  $^{13}\text{C}$  NMR (100 MHz,  $\text{CDCl}_3$ ): 155.7 ( $\text{C}=\text{O}$ ), 136.6 (C), 136.5 (C), 133.5 ( $\text{CH}=\text{CH}_2$ ), 130.5 (CH), 129.5, 128.6, 128.5, 128.2, 127.7, 126.5 ( $\text{CH}^{\text{Ar}}$ ), 118.6 ( $\text{CH}=\text{CH}_2$ ), 66.8 ( $\text{OCH}_2$ ), 52.2 (allyl- $\text{CH}$ ), 39.8 (vinyl- $\text{CH}_2$ ); LRMS (ESI,  $m/z$ ):  $[\text{M} + \text{Na}]^+$  calculated for  $\text{C}_{20}\text{H}_{21}\text{NNaO}_2$ , 346.1; found: 346.1.

**Benzyl (1-phenylhex-5-en-1-yn-3-yl)carbamate (3k):**<sup>2</sup> 98% yield;  $R_f$  = 0.21 (05:95 = EtOAc/Hexane); Colorless solid; mp. 54-55°C; IR (neat): 3318, 3065, 1713, 1505, 1337, 1237, 1027, 918, 755  $\text{cm}^{-1}$ ;  $^1\text{H}$  NMR (400 MHz,  $\text{CDCl}_3$ ):

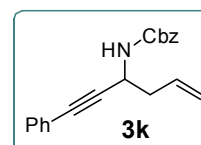

7.54-7.22 (10H), 6.10-6.85 (1H), 5.40-5.00 (5H), 4.84 (s, 1H), 2.80-2.40 (2H);  $^{13}\text{C}$  NMR (100 MHz,  $\text{CDCl}_3$ ): 155.3 ( $\text{C}=\text{O}$ ), 136.3 (C), 132.8 ( $\text{CH}=\text{CH}_2$ ), 131.7, 128.5, 128.4, 128.3, 128.2 ( $\text{CH}^{\text{Ar}}$ ), 122.5 (C), 119.1 ( $\text{CH}=\text{CH}_2$ ), 87.8 (Ph- $\text{C}\equiv\text{C}$ ), 83.7 (Ph- $\text{C}\equiv\text{C}$ ), 67.0 ( $\text{OCH}_2$ ), 43.4 (allyl- $\text{CH}$ ), 40.4 (vinyl- $\text{CH}_2$ ); LRMS (ESI,  $m/z$ ):  $[\text{M} + \text{Na}]^+$  calculated for  $\text{C}_{20}\text{H}_{19}\text{NNaO}_2$ : (M + Na): 328.1; found: 328.1.

**Benzyl (1-cyclohexylbut-3-en-1-yl)carbamate (3l):**<sup>2,3</sup> 96% yield;  $R_f = 0.48$

(10:90 = EtOAc/Hexane); Colorless solid; mp. 59-60°C; IR (neat): 3329, 2926, 1694, 1537, 1255, 1026, 912  $\text{cm}^{-1}$ ;  $^1\text{H}$  NMR (400 MHz,  $\text{CDCl}_3$ ): 7.45-7.30

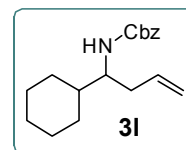

(5H), 5.78 (m,  $J = 4, 8$  Hz, 1H), 5.20-5.00 (4H), 4.61 (d,  $J = 8$  Hz, 1H), 3.61 (1H), 2.40-2.05 (2H), 1.85-1.60 (5H), 1.50-0.85 (6H);  $^{13}\text{C}$  NMR (100 MHz,  $\text{CDCl}_3$ ): 156.3 (C=O), 136.7 (C), 134.7 (CH=CH<sub>2</sub>), 128.5, 128.0 (CH<sup>Ar</sup>), 117.5 (CH=CH<sub>2</sub>), 66.5 (OCH<sub>2</sub>), 55.2 (allyl-CH), 41.4 (CH), 36.7 (vinyl-CH<sub>2</sub>), 29.7, 28.3, 26.4, 26.2, 26.1 (CH<sub>2</sub>); LRMS (ESI,  $m/z$ ): [M + K]<sup>+</sup> calculated for C<sub>18</sub>H<sub>25</sub>NKO<sub>2</sub>, 326.1; found: 326.1.

**Benzyl (6-methylhept-1-en-4-yl)carbamate (3m):** 90% yield;  $R_f = 0.43$

(10:90 = EtOAc/Hexane); Colorless liquid; IR (neat): 3329, 2956, 1694, 1531, 1263, 1232, 1025, 914  $\text{cm}^{-1}$ ;  $^1\text{H}$  NMR (400 MHz,  $\text{CDCl}_3$ ): 7.42-7.30 (5H),

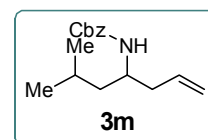

5.79 (m,  $J = 8$  Hz, 1H), 5.25-4.95 (4H), 4.55 (1H), 3.82 (1H), 2.25 (dq,  $J = 8, 16$  Hz, 2H), 1.69 (ht,  $J = 8$  Hz, 1H), 1.32 (t,  $J = 8$  Hz, 2H), 0.94 (t,  $J = 4$  Hz, 6H);  $^{13}\text{C}$  NMR (100 MHz,  $\text{CDCl}_3$ ): 155.9 (C=O), 136.7 (C), 134.2 (CH=CH<sub>2</sub>), 128.5, 128.04, 128.01 (CH<sup>Ar</sup>), 117.9 (CH=CH<sub>2</sub>), 66.5 (OCH<sub>2</sub>), 48.8 (allyl-CH), 43.9 (CH<sub>2</sub>), 40.0 (CH<sub>2</sub>), 24.8 (CHMe<sub>2</sub>), 23.0, 22.2 (CH<sub>3</sub>); HRMS (ESI,  $m/z$ ): [M + Na]<sup>+</sup> calculated for C<sub>16</sub>H<sub>23</sub>NNaO<sub>2</sub>: 284.1621; found: 284.1627.

**Benzyl (1-phenylpent-4-en-2-yl)carbamate (3n):**<sup>1,3</sup> 76% yield;  $R_f = 0.40$

(10:90 = EtOAc/Hexane); Colorless solid; mp. 46-48°C; IR (neat): 3351, 2933, 1726, 1505, 1455, 1237, 1086, 916, 745  $\text{cm}^{-1}$ ;  $^1\text{H}$  NMR (400 MHz,  $\text{CDCl}_3$ ): 7.45-7.10 (10H), 5.95-5.70 (1H), 5.25-5.00 (4H), 4.68 (s, 1H), 4.01

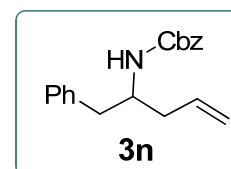

(s, 1H), 2.98-2.70 (2H), 2.45-2.05 (2H);  $^{13}\text{C}$  NMR (100 MHz,  $\text{CDCl}_3$ ): 155.7 (C=O), 137.8 (C), 136.6 (C), 134.1 (CH=CH<sub>2</sub>), 129.4, 128.5, 128.4, 128.1, 128.0, 126.4, 118.2 (CH=CH<sub>2</sub>), 66.5 (OCH<sub>3</sub>), 51.6 (allyl-CH), 40.4 (CH<sub>2</sub>), 38.1 (CH<sub>2</sub>); HRMS (ESI,  $m/z$ ): [M + Na]<sup>+</sup> calculated for C<sub>19</sub>H<sub>21</sub>NNaO<sub>2</sub>, 318.1470; found: 318.1462.

**Benzyl (1-phenylhex-5-en-3-yl)carbamate (3o):**<sup>2</sup> 88% yield;  $R_f = 0.17$

(5:95 = EtOAc/Hexane); Colorless solid; mp. 49-50°C; IR (neat): 3328, 3029, 2944, 1698, 1531, 1454, 1242, 1046, 915  $\text{cm}^{-1}$ ;  $^1\text{H}$  NMR (400 MHz,  $\text{CDCl}_3$ ): 7.50-7.08 (10H), 5.92-5.65 (1H), 5.25-5.00 (4H), 4.81- 4.40 (1H), 4.00 – 3.60

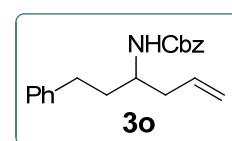

(1H), 2.80-2.60 (2H), 2.40-2.15 (2H), 1.95-1.65 (2H);  $^{13}\text{C}$  NMR (100 MHz,  $\text{CDCl}_3$ ): 156.0 (C=O), 141.1 (C), 136.6 (C), 133.9 (CH=CH<sub>2</sub>), 128.5, 128.4, 128.3, 128.1, 128.0, 125.9 (CH<sup>Ar</sup>), 118.1 (CH=CH<sub>2</sub>), 66.6 (OCH<sub>2</sub>), 50.5 (allyl-C), 39.5 (vinyl-CH<sub>2</sub>), 36.5, 32.4 (CH<sub>2</sub>); HRMS (ESI,  $m/z$ ): [M + Na]<sup>+</sup> calculated for C<sub>20</sub>H<sub>23</sub>NNaO<sub>2</sub>, 332.1626; found: 332.1617.

**Ethyl (1-phenylbut-3-en-1-yl)carbamate (3p):**<sup>2,3</sup> 95% yield; R<sub>f</sub> = 0.27 (10:90 = EtOAc/Hexane); Colorless liquid; IR (neat): 3324, 2980, 1694, 1531, 1252, 1047, 917 cm<sup>-1</sup>;  $^1\text{H}$  NMR (400 MHz,  $\text{CDCl}_3$ ): 7.42-7.21 (5H), 5.80-5.60 (1H),

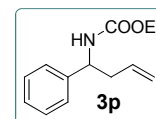

5.20-5.00 (3H), 4.81 (s, 1H), 4.10 (q, J = 8 Hz, 2H), 2.56 (t, J = 8 Hz, 2H), 1.24 (bs, 3H);  $^{13}\text{C}$  NMR (100 MHz,  $\text{CDCl}_3$ ): 155.9 (C=O), 142.1 (C), 133.8 (CH=CH<sub>2</sub>), 128.5, 127.2, 126.2 (CH<sup>Ar</sup>), 118.3 (CH=CH<sub>2</sub>), 60.9 (OCH<sub>2</sub>), 54.3 (allyl-CH), 41.1 (vinyl-CH<sub>2</sub>), 14.6 (CH<sub>3</sub>); HRMS (ESI,  $m/z$ ): [M + Na]<sup>+</sup> calculated for C<sub>13</sub>H<sub>17</sub>NNaO<sub>2</sub>: 242.1157; found: 242.1161.

**Benzyl (1-allylcyclohexyl)carbamate (6a):**<sup>2</sup> 70% yield; R<sub>f</sub> = 0.43 (05:95 = EtOAc/Hexane); Colorless liquid; IR (neat): 3352, 2931, 1730, 1505, 1248, 1092, 973, 917 cm<sup>-1</sup>;  $^1\text{H}$  NMR (400 MHz,  $\text{CDCl}_3$ ): 7.42-7.30 (5H), 5.86-5.70

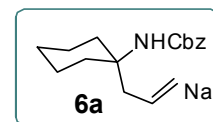

(1H), 5.15-4.95 (4H), 4.56 (s, 1H), 2.50 (d, J = 8 Hz, 2H), 2.99 (bs, 2H), 1.65-1.11 (8H);  $^{13}\text{C}$  NMR (100 MHz,  $\text{CDCl}_3$ ): 154.5 (C=O), 136.8 (C), 133.7 (CH=CH<sub>2</sub>), 128.5, 128.0 (CH<sup>Ar</sup>), 118.0 (CH=CH<sub>2</sub>), 65.9 (OCH<sub>2</sub>), 54.7 (allyl-C), 42.5 (vinyl-CH<sub>2</sub>), 34.7, 25.6, 21.6 (CH<sub>2</sub>); LRMS (ESI,  $m/z$ ): [M + Na]<sup>+</sup> calculated for C<sub>17</sub>H<sub>23</sub>NNaO<sub>2</sub>, 296.1; found: 296.1.

**Ethyl (1-allylcyclohexyl)carbamate (6b):** 75% yield; R<sub>f</sub> = 0.42 (05:95 = EtOAc/Hexane); Colorless liquid; IR (neat): 3352, 2932, 1713, 1505, 1228, 1103, 914 cm<sup>-1</sup>;  $^1\text{H}$  NMR (400 MHz,  $\text{CDCl}_3$ ): 5.86-5.66 (1H), 5.16-5.00

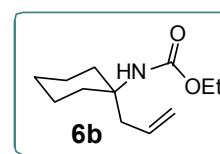

(2H), 4.43 (s, 1H), 4.07 (s, 2H), 2.47 (d, J = 8Hz, 2H), 2.08- 1.85 (2H), 1.65-1.05 (11H);  $^{13}\text{C}$  NMR (100 MHz,  $\text{CDCl}_3$ ): 154.8 (C=O), 133.8 (CH=CH<sub>2</sub>), 117.9 (CH=CH<sub>2</sub>), 60.0 (OCH<sub>2</sub>), 54.5 (allyl-C), 42.6 (vinyl-CH<sub>2</sub>), 34.7, 25.6, 21.6 (CH<sub>2</sub>), 14.6 (CH<sub>3</sub>); HRMS (ESI,  $m/z$ ): [M + Na]<sup>+</sup> calculated for C<sub>12</sub>H<sub>21</sub>NNaO<sub>2</sub>: (M + Na): 234.1465; found: 234.1467.

**Benzyl (1-allyl-2-methylcyclohexyl)carbamate (6c):** 61% yield; R<sub>f</sub> = 0.50 (5:95 = EtOAc/Hexane); dr = 20:80; Colorless liquid; IR (neat): 3358, 2931,

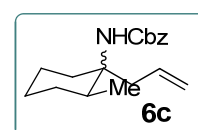

1714, 1513, 1213, 1075, 913  $\text{cm}^{-1}$ ;  $^1\text{H}$  NMR (400 MHz,  $\text{CDCl}_3$ ): 7.50-7.30 (5H), 5.79 (m,  $J = 8$  Hz, 1H), 5.25-4.95 (4H), 4.76-4.48 (1H), 2.96 (s, 1H), 2.65-1.95 (2H), 1.90-1.10 (8H), 1.01-0.86 (3H);  $^{13}\text{C}$  NMR (100 MHz,  $\text{CDCl}_3$ ): 154.8 (C=O), 154.7 (C=O of second diastereomer), 136.8 (C), 134.1, 133.4, 128.54, 128.51, 128.1, 128.06, 128.02, 128.00, 118.6 (CH=CH<sub>2</sub>), 117.9 (CH=CH<sub>2</sub> of second diastereomer), 66.1 (OCH<sub>2</sub>), 57.9 (allyl-C), 57.3, 40.7, 36.8, 35.4, 31.5, 29.8, 24.6, 22.1, 21.5, 15.0 (CH<sub>3</sub>); HRMS (ESI,  $m/z$ ):  $[\text{M} + \text{Na}]^+$  calculated for  $\text{C}_{18}\text{H}_{25}\text{NNaO}_2$ , 310.1778; found: 310.1777.

**Benzyl ((1*r*,4*r*)-1-allyl-4-methylcyclohexyl)carbamate (6d):** 82% yield;

$R_f = 0.15$  (2:98 = EtOAc/Hexane);  $dr = 10:90$ ; Colorless liquid; IR (neat):

3351, 2924, 1713, 1505, 1455, 1226, 1094, 988, 915  $\text{cm}^{-1}$ ;  $^1\text{H}$  NMR (400

MHz,  $\text{CDCl}_3$ ): 7.45-7.30 (5H), 5.90-5.70 (1H), 5.30-4.90 (4H), 4.70-4.30 (two s, 1H), 2.56 & 2.48 (two d for two diastereomers,  $J = 7.2$  Hz, 2H), 2.11 (d,  $J = 13.2$  Hz, 2H), 1.67-1.45 (2H), 1.43-1.20 (3H), 1.18-1.01 (2H), 0.97-0.85 (3H);  $^{13}\text{C}$  NMR (100 MHz,  $\text{CDCl}_3$ ): 154.58 & 154.53 (C=O of two diastereomers), 136.9 (C), 133.8 & 133.6 (CH=CH<sub>2</sub>), 128.5, 128.02, 128.01 (CH<sup>Ar</sup>), 118.1 & 118.0 (CH=CH<sub>2</sub>), 66.0 (OCH<sub>2</sub>), 54.2 (allyl-C), 43.9 (vinyl-CH<sub>2</sub>), 34.5, 32.2 (CH), 30.2 (CH<sub>2</sub>), 22.2 (CH<sub>3</sub>); HRMS (ESI,  $m/z$ ):  $[\text{M} + \text{Na}]^+$  calculated for  $\text{C}_{18}\text{H}_{25}\text{NNaO}_2$ , 310.1783; found: 310.1788.

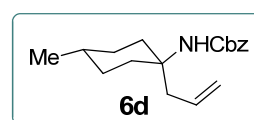

**Benzyl ((1*r*,4*r*)-1-allyl-4-hydroxycyclohexyl)carbamate (6e):** 76%

yield;  $R_f = 0.33$  (40:60 = EtOAc/Hexane);  $dr = 23:77$ ; Colorless liquid; IR

(neat): 3410, 3342, 2935, 1702, 1508, 1455, 1247, 1073, 989, 916  $\text{cm}^{-1}$ ;

$^1\text{H}$  NMR (400 MHz,  $\text{CDCl}_3$ ): 7.50-7.20 (5H), 5.87-5.66 (1H), 5.25-4.95 (4H), 4.75-4.55 (two s, 1H), 3.98 - 3.54 (two m for two diastereomers, 1H), 2.52 & 2.46 (two d,  $J = 7.2$  Hz, 2H), 1.96 (b s, 1H), 1.86-1.65 (5H), 1.64-1.25 (3H);  $^{13}\text{C}$  NMR (100 MHz,  $\text{CDCl}_3$ ): 154.7 & 154.6 (C=O of two diastereomers), 136.7 (C), 133.4 133.2 (CH=CH<sub>2</sub>), 128.5, 128.08, 128.04, 128.01 (CH<sup>Ar</sup>), 118.5 & 118.4 (CH=CH<sub>2</sub>), 69.7, 66.9 (HO-CH), 66.1 (OCH<sub>2</sub>), 54.4, 53.7 (allyl-C), 41.1 (vinyl-CH<sub>2</sub>), 30.4, 29.2 (CH<sub>2</sub>); HRMS (ESI,  $m/z$ ):  $[\text{M} + \text{Na}]^+$  calculated for  $\text{C}_{17}\text{H}_{23}\text{NNaO}_3$ , 312.1570; found: 312.1554.

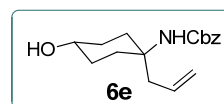



**Benzyl ((1*r*,4*r*)-1-allyl-4-(tert-butyl)cyclohexyl)carbamate (6f):** 90%

yield;  $R_f = 0.45$  (5:95 = EtOAc/Hexane);  $dr = 6:94$ ; Colorless solid; mp.

80-81°C; IR (neat): 3353, 2948, 1694, 1523, 1256, 1234, 1098, 911  $\text{cm}^{-1}$ ;

$^1\text{H}$  NMR (400 MHz,  $\text{CDCl}_3$ ): 7.45-7.25 (5H), 5.88-5.70 (1H), 5.30-4.90 (4H), 4.48 (s, 1H), 2.46 (d,  $J = 8$  Hz, 2H), 2.17 (d,  $J = 12$  Hz, 2H), 1.72-1.52 (2H), 1.40-1.06 (4H), 1.05-0.75 (10H);  $^{13}\text{C}$

NMR (100 MHz,  $\text{CDCl}_3$ ): 154.6 (C=O), 154.5 (C=O), 136.9 (C), 133.8 (CH=CH<sub>2</sub>), 128.0, 127.9 (CH<sup>Ar</sup>), 118.0 (CH=CH<sub>2</sub>), 65.9 (OCH<sub>2</sub>), 54.3 (allyl-C), 47.7, 44.0, 35.0, 32.3, 27.5, 22.3 (CH<sub>3</sub>);

HRMS (ESI,  $m/z$ ):  $[\text{M} + \text{Na}]^+$  calculated for  $\text{C}_{21}\text{H}_{31}\text{NNaO}_2$ , 352.2247; found: 352.2247.

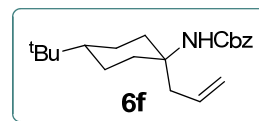

**Ethyl ((1*r*,4*r*)-1-allyl-4-(tert-butyl)cyclohexyl)carbamate (6g):** 86%

yield;  $R_f = 0.42$  (5:95 = EtOAc/Hexane);  $dr = 6:94$ ; Colorless liquid; IR

(neat): 3346, 2943, 1713, 1505, 1257, 1234, 1103, 913  $\text{cm}^{-1}$ ;  $^1\text{H}$  NMR

(400 MHz,  $\text{CDCl}_3$ ): 5.90-5.70 (1H), 5.18-4.98 (2H), 4.35 (s, 1H), 4.08

(q,  $J = 8$  Hz, 2H), 2.44 (d,  $J = 8$  Hz, 2H), 2.26-1.98 (2H), 1.68-1.52 (2H), 1.35-0.75 (17H);  $^{13}\text{C}$

NMR (100 MHz,  $\text{CDCl}_3$ ): 154.9 (C=O), 134.0 (CH=CH<sub>2</sub>), 117.8 (CH=CH<sub>2</sub>), 60.0 (OCH<sub>2</sub>), 54.1

(allyl-C), 47.8, 44.0, 35.1, 32.3, 27.5, 22.9, 22.3 (CH<sub>2</sub>), 14.6 (CH<sub>3</sub>); HRMS (ESI,  $m/z$ ):  $[\text{M} + \text{Na}]^+$  calculated for  $\text{C}_{16}\text{H}_{29}\text{NNaO}_2$ : (M + Na): 290.2096; found: 290.2096.

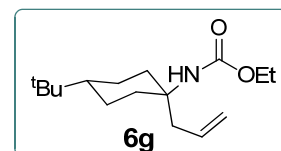

**Benzyl (1-allylcycloheptyl)carbamate (6h):**<sup>2</sup> 77% yield;  $R_f = 0.41$  (5:95 =

EtOAc/Hexane); Colorless liquid; IR (neat): 3351, 2926, 2856, 1715, 1505,

1461, 1227, 1099, 1024, 914  $\text{cm}^{-1}$ ;  $^1\text{H}$  NMR (400 MHz,  $\text{CDCl}_3$ ): 7.44-7.29

(5H), 5.86-5.70 (1H), 5.20-4.95 (4H), 4.61 (s, 1H), 2.52 (d,  $J = 7.2$  Hz, 2H), 2.00-1.80 (2H),

1.78-1.40 (10H);  $^{13}\text{C}$  NMR (100 MHz,  $\text{CDCl}_3$ ): 154.5 (C=O), 136.8 (C), 134.1 (CH=CH<sub>2</sub>),

128.5, 128.03, 128.01 (CH<sup>Ar</sup>), 118.1 (CH=CH<sub>2</sub>), 66.0 (OCH<sub>2</sub>), 58.5 (allyl-C), 43.0 (vinyl-CH<sub>2</sub>),

38.4, 29.4, 22.2 (CH<sub>2</sub>); HRMS (ESI,  $m/z$ ):  $[\text{M} + \text{Na}]^+$  calculated for  $\text{C}_{18}\text{H}_{25}\text{NNaO}_2$ , 310.1778;

found: 310.1776.

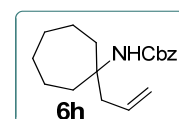

**Benzyl ((1*r*,3*r*,5*r*,7*r*)-2-allyladamantan-2-yl)carbamate (6i):** 68% yield;

$R_f = 0.41$  (5:95 = EtOAc/Hexane); Colorless solid; mp. 52-53°C; IR

(neat): 3352, 2910, 1738, 1505, 1230, 1089, 991, 913  $\text{cm}^{-1}$ ;  $^1\text{H}$  NMR (400

MHz,  $\text{CDCl}_3$ ): 7.41-7.30 (5H), 7.85-7.65 (1H), 5.20-4.95 (4H), 4.63 (s,

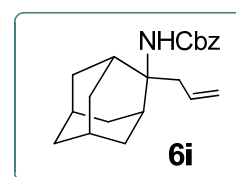

1H), 2.80 (d,  $J = 8$  Hz, 2H), 2.15 (s, 2H), 2.10-1.93 (4H), 1.94-1.78 (2H), 1.77-1.53 (6H);  $^{13}\text{C}$  NMR (100 MHz,  $\text{CDCl}_3$ ): 154.2 (C=O), 136.9 (C), 133.7 (CH=CH<sub>2</sub>), 128.5, 128.0, 127.9 (CH<sup>Ar</sup>), 117.8 (CH=CH<sub>2</sub>), 65.9 (OCH<sub>2</sub>), 59.5 (allyl-C), 38.5 (vinyl-CH<sub>2</sub>), 37.0 (CH), 33.3 (CH<sub>2</sub>), 32.9, 32.8, 27.2 (CH), 27.0 (CH<sub>2</sub>); HRMS (ESI,  $m/z$ ):  $[\text{M} + \text{Na}]^+$  calculated for  $\text{C}_{21}\text{H}_{27}\text{NNaO}_2$ : (M + Na): 348.1934; found: 348.1936.

**Benzyl (3-methyl-1-phenylhex-5-en-3-yl)carbamate (6j):** 62% yield;

$R_f = 0.32$  (5:95 = EtOAc/Hexane); Colorless liquid; IR (neat): 3351, 2933, 1713, 1505, 1237, 1074, 916  $\text{cm}^{-1}$ ;  $^1\text{H}$  NMR (400 MHz,  $\text{CDCl}_3$ ): 7.50-7.10 (10H), 5.92-5.76 (1H), 5.25-5.03 (4H), 4.71 (s, 1H), 2.70-2.54

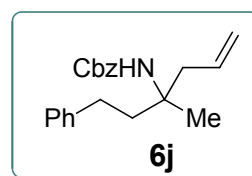

(3H), 2.50-2.32 (1H), 2.22-1.82 (2H), 1.36 (s, 3H);  $^{13}\text{C}$  NMR (100 MHz,  $\text{CDCl}_3$ ): 153.6 (C=O), 141.2 (C), 135.9 (C), 132.5 (CH=CH<sub>2</sub>), 127.6, 127.5, 127.24, 127.21, 124.9 (CH<sup>Ar</sup>), 117.9 (CH=CH<sub>2</sub>), 65.2 (OCH<sub>2</sub>), 54.1 (allyl-C), 42.4 (vinyl-CH<sub>2</sub>), 39.6, 29.3 (CH<sub>2</sub>), 23.6 (CH<sub>3</sub>); HRMS (ESI,  $m/z$ ):  $[\text{M} + \text{Na}]^+$  calculated for  $\text{C}_{21}\text{H}_{25}\text{NNaO}_2$ , 346.1778; found: 346.1778.

**Benzyl (3-ethyl-1-phenylhex-5-en-3-yl)carbamate (6k):** 40% yield;  $R_f$

$= 0.39$  (5:95 = EtOAc/Hexane); Colorless liquid; IR (neat): 3353, 2962, 2937, 1715, 1505, 1455, 1231, 1088, 916  $\text{cm}^{-1}$ ;  $^1\text{H}$  NMR (400 MHz,

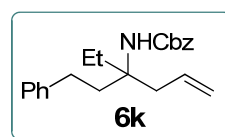

$\text{CDCl}_3$ ): 7.50-7.10 (10H), 5.95-5.67 (1H), 5.25-5.00 (4H), 4.54 (s, 1H), 2.66-2.38 (4H), 2.10-1.85 (2H), 1.75 (q,  $J = 7.6$  Hz, 2H), 0.92 (t,  $J = 7.6$  Hz, 3H);  $^{13}\text{C}$  NMR (100 MHz,  $\text{CDCl}_3$ ): 154.3 (C=O), 142.2 (C), 136.8 (C), 133.2 (CH=CH<sub>2</sub>), 128.5, 128.3, 128.0, 125.8 (CH<sup>Ar</sup>), 118.5 (CH=CH<sub>2</sub>), 66.1 (OCH<sub>2</sub>), 57.8 (allyl-C), 39.2, 37.1, 29.8, 27.9 (CH<sub>2</sub>), 7.8 (CH<sub>3</sub>); HRMS (ESI,  $m/z$ ):  $[\text{M} + \text{Na}]^+$  calculated for  $\text{C}_{22}\text{H}_{27}\text{NNaO}_2$ , 360.1939; found: 360.1937.

**Benzyl (4-methylnone-1-en-4-yl)carbamate (6l):** 54% yield;  $R_f = 0.45$

(5:95 = EtOAc/Hexane); Colorless liquid; IR (neat): 3352, 2931, 1714, 1505, 1235, 1089, 914  $\text{cm}^{-1}$ ;  $^1\text{H}$  NMR (400 MHz,  $\text{CDCl}_3$ ): 7.45-7.25

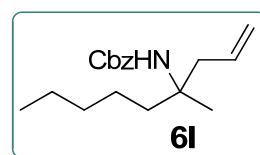

(5H), 5.88-5.72 (1H), 5.16-5.00 (4H), 4.63 (s, 1H), 2.60-2.25 (2H), 1.85-1.45 (2H), 1.40-1.10 (9H), 0.90 (t,  $J = 6.8$  Hz, 3H);  $^{13}\text{C}$  NMR (100 MHz,  $\text{CDCl}_3$ ): 154.5 (C=O), 136.8 (C), 133.7 (CH=CH<sub>2</sub>), 128.5, 128.0, 128.01 (CH<sup>Ar</sup>), 118.4 (CH=CH<sub>2</sub>), 66.0 (OCH<sub>2</sub>), 55.0

(allyl-C), 43.0 (vinyl-CH<sub>2</sub>), 38.6, 32.1, 29.7, 24.3 (CH<sub>2</sub>), 23.2 (CH<sub>3</sub>), 22.6 (CH<sub>2</sub>), 14.0 (CH<sub>3</sub>); HRMS (ESI, *m/z*): [M + Na]<sup>+</sup> calculated for C<sub>18</sub>H<sub>27</sub>NNaO<sub>2</sub>: 312.1934; found: 312.1931.

**Benzyl (4-methylpentadec-1-en-4-yl)carbamate (6m):** 49%

yield; R<sub>f</sub> = 0.41 (5:95 = EtOAc/Hexane); Colorless liquid; IR

(neat): 3356, 2925, 1730, 1505, 1235, 1088, 914 cm<sup>-1</sup>; <sup>1</sup>H NMR

(400 MHz, CDCl<sub>3</sub>): 7.44-7.29 (5H), 5.88-5.68 (1H), 5.20-5.00 (4H), 4.62 (s, 1H), 2.60-2.22

(2H), 1.90-1.10 (23H), 0.90 (t, *J* = 8Hz, 3H); <sup>13</sup>C NMR (100 MHz, CDCl<sub>3</sub>): 154.5 (C=O), 136.8

(C), 133.8 (CH=CH<sub>2</sub>), 128.5, 128.05, 128.02 (CH<sup>Ar</sup>), 118.4 (CH=CH<sub>2</sub>), 55.0 (OCH<sub>2</sub>), 31.9, 29.9,

29.6, 29.3 (CH<sub>2</sub>), 23.6 (CH<sub>3</sub>), 22.7 (CH<sub>2</sub>), 14.1 (CH<sub>3</sub>); HRMS (ESI, *m/z*): [M + Na]<sup>+</sup> calculated for C<sub>24</sub>H<sub>39</sub>NNaO<sub>2</sub>, 396.2873; found: 396.2863.

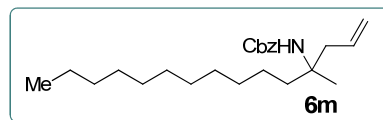

**Benzyl (4-ethylhept-1-en-4-yl)carbamate (6n):** 78% yield; R<sub>f</sub> = 0.33 (5:95 =

EtOAc/Hexane); Colorless liquid; IR (neat): 3351, 2961, 1715, 1506, 1455,

1233, 1097, 1075 cm<sup>-1</sup>; <sup>1</sup>H NMR (400 MHz, CDCl<sub>3</sub>): 7.45-7.25 (5H), 5.88-

5.72 (1H), 5.20-5.00 (4H), 4.48 (s, 1H), 2.42 (d, *J* = 7.2 Hz, 2H), 1.80-1.50 (4H), 1.40-1.20 (2H),

0.93 (t, *J* = 7.2 Hz, 3H), 0.84 (t, *J* = 7.2 Hz, 3H); <sup>13</sup>C NMR (100 MHz, CDCl<sub>3</sub>): 154.3 (C=O),

136.8 (C), 133.5 (CH=CH<sub>2</sub>), 128.5, 128.0 (CH<sup>Ar</sup>), 118.2 (CH=CH<sub>2</sub>), 65.9 (OCH<sub>2</sub>), 57.8 (allyl-C),

39.3, 37.4, 27.9, 16.3 (CH<sub>2</sub>), 14.4, 7.5 (CH<sub>3</sub>); HRMS (ESI, *m/z*): [M + Na]<sup>+</sup> calculated for

C<sub>17</sub>H<sub>25</sub>NNaO<sub>2</sub>: 298.1783; found: 298.1784.

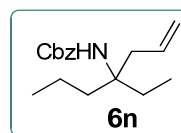

## References:

- [1] P. Phukan, *J. Org. Chem.*, 2004, **69**, 4005.
- [2] Q.-Y. Song, B.-L. Yang and S.-K. Tian, *J. Org. Chem.*, 2007, **72**, 5407.
- [3] T. Ollevier and Z. Li, *Adv. Synth. Catal.*, 2009, **351**, 3251.
- [4] B. Das, K. Damodar, D. Saritha, N. Chowdhury and M. Krishnaiah, *Tetrahedron Letters*, 2007, **48**, 7930.
